# Supplementary material for: Novel Mobile Integrons and Strain-Specific Integrase Genes within <em>Shewanella</em> spp. Unveil Multiple Lateral Genetic Transfer Events within the Genus
Source: Preprints.org preprint supplement (doi:10.20944/preprints202204.0173.v1), 2022-04-19
Supplement: Supplementary file 1 [file supplementary]

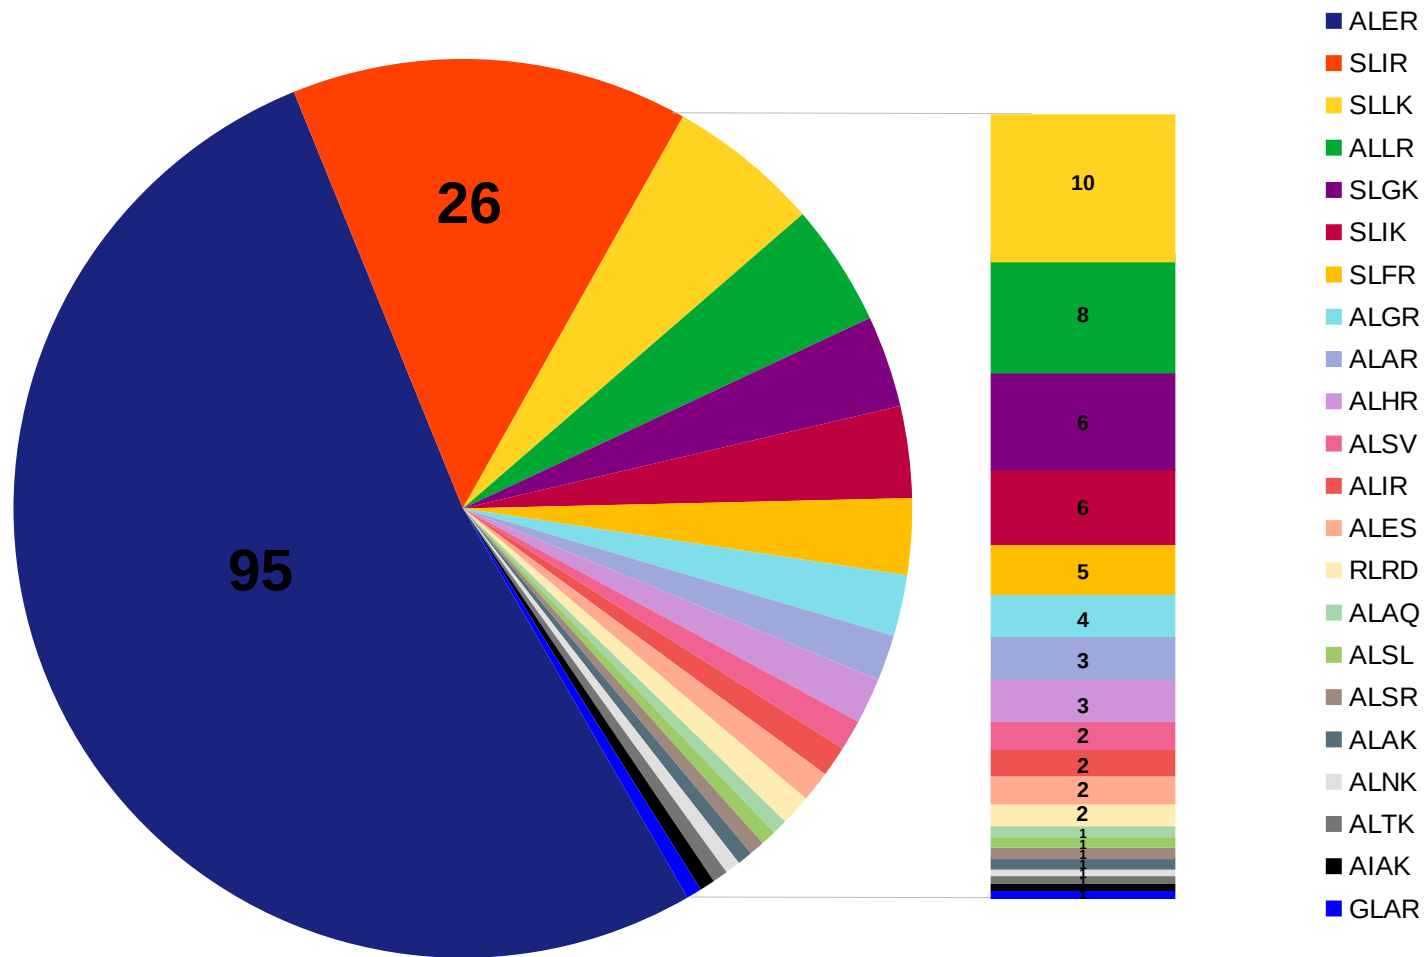

**Figure S3.** Diversity of ALER motives identified in the different integron-integrases found in *Shewanella* spp..Each color corresponds to a different variant of the ALER motive.
