# Supplementary material for: Novel Mobile Integrons and Strain-Specific Integrase Genes within <em>Shewanella</em> spp. Unveil Multiple Lateral Genetic Transfer Events within the Genus
Source: Preprints.org preprint supplement (doi:10.20944/preprints202204.0173.v1), 2022-04-19
Supplement: Supplementary file 1 [file Table S1. Data Set.xlsx]

## Sheet: Data Set
Table S1. Data Set.
Organism Name	Strain	Assembly/sequence	Level	Size(Mb)	WGS	Scaffolds	CDS
Shewanella aestuarii	PN3F2	GCA_011765625.1	Complete	4.47286	N/A	3	3630
Shewanella aestuarii	JCM 17801	GCA_014647215.1	Contig	3.884	BMOT01	27	3297
Shewanella algae	CCU101	GCA_003427415.1	Complete	4.91934	N/A	2	3944
Shewanella algae	KC-Na-R1	GCA_003721455.1	Complete	5.20344	N/A	2	4528
Shewanella algae	RQs-106	GCA_009730655.1	Complete	4.99003	N/A	1	4282
Shewanella algae	18064-CSB-B-B	GCA_009846595.1	Complete	4.90387	N/A	2	4249
Shewanella algae	2NE11	GCA_014263185.1	Complete	5.03081	N/A	1	4288
Shewanella algae	VGH117	GCA_014702225.1	Complete	4.7968	N/A	1	4110
Shewanella algae	CECT 5071	GCA_009183365.2	Complete	4.92476	N/A	1	4224
Shewanella algae	150735	GCA_017570325.1	Complete	5.07055	N/A	1	4357
Shewanella algae	A291	GCA_017570045.1	Complete	4.97157	N/A	1	4206
Shewanella algae	A59	GCA_017570125.1	Complete	4.81765	N/A	1	4116
Shewanella algae	G1	GCA_017570225.1	Complete	4.88775	N/A	1	4200
Shewanella algae	C6G3	GCA_000956365.1	Contig	4.87943	JPMA01	43	0
Shewanella algae	BrY	GCA_001870495.1	Contig	4.54712	MDKA01	121	4003
Shewanella algae	Sh392	GCA_003124085.1	Contig	4.79585	QFDC01	153	4198
Shewanella algae	NCTC10738	GCA_900457125.1	Contig	4.99704	UGYO01	3	4291
Shewanella algae	CLS1	GCA_007595085.1	Contig	4.88725	LTBI01	159	4327
Shewanella algae	CLS2	GCA_007595365.1	Contig	4.87873	LVDV01	115	4243
Shewanella algae	SYT1	GCA_007595095.1	Contig	4.8146	LUCP01	103	4181
Shewanella algae	TYL	GCA_007636495.1	Contig	4.82172	LVDS01	100	4183
Shewanella algae	ATCC 51192	GCA_012396675.1	Contig	4.97836	JAAXPX01	52	4301
Shewanella algae	404	GCA_017580715.1	Contig	4.88081	JADZHZ01	71	4261
Shewanella algae	5043	GCA_017580635.1	Contig	4.99718	JADZHW01	52	4378
Shewanella algae	28011	GCA_017580565.1	Contig	4.94371	JADZHR01	71	4312
Shewanella algae	97087	GCA_017580395.1	Contig	4.8565	JADZHJ01	98	4202
Shewanella algae	159418	GCA_017580345.1	Contig	4.76954	JADZHI01	62	4120
Shewanella algae	669801	GCA_017580325.1	Contig	4.77617	JADZHG01	36	4138
Shewanella algae	950570	GCA_017580295.1	Contig	4.75637	JADZHF01	46	4116
Shewanella algae	6F5	GCA_017580285.1	Contig	4.87028	JADZHE01	71	4230
Shewanella algae	A292	GCA_017580235.1	Contig	4.95777	JADZHD01	46	4319
Shewanella algae	A41	GCA_017580225.1	Contig	4.86921	JADZHC01	129	4230
Shewanella algae	A56	GCA_017580215.1	Contig	4.84839	JADZHB01	51	4196
Shewanella algae	A57	GCA_017580185.1	Contig	4.661	JADZHA01	95	4040
Shewanella algae	A58	GCA_017580205.1	Contig	4.82278	JADZGZ01	111	4215
Shewanella algae	A60	GCA_017580095.1	Contig	4.81851	JADZGY01	38	4177
Shewanella algae	A65	GCA_017580125.1	Contig	4.90178	JADZGX01	61	4264
Shewanella algae	A93	GCA_017580145.1	Contig	4.9574	JADZGW01	64	4331
Shewanella algae	A94	GCA_017580105.1	Contig	4.88208	JADZGV01	44	4259
Shewanella algae	A97	GCA_017580085.1	Contig	5.00595	JADZGU01	62	4384
Shewanella algae	CCUG-12945	GCA_017580665.1	Contig	4.87589	JADZHV01	40	4229
Shewanella algae	CCUG-15259	GCA_017580585.1	Contig	4.8915	JADZHU01	50	4270
Shewanella algae	CCUG-20533	GCA_017580595.1	Contig	4.83593	JADZHT01	58	4200
Shewanella algae	CCUG-24987	GCA_017580525.1	Contig	4.8143	JADZHS01	89	4192
Shewanella algae	CCUG-38646	GCA_017580485.1	Contig	4.7902	JADZHQ01	35	4136
Shewanella algae	CCUG-48086	GCA_017580505.1	Contig	4.84441	JADZHP01	33	4194
Shewanella algae	CCUG-50501	GCA_017580535.1	Contig	5.01662	JADZHO01	71	4390
Shewanella algae	CCUG-526	GCA_017580685.1	Contig	4.78437	JADZHY01	45	4161
Shewanella algae	CCUG-56496	GCA_017580455.1	Contig	4.79618	JADZHN01	38	4160
Shewanella algae	CCUG-58400	GCA_017580385.1	Contig	4.76686	JADZHM01	51	4121
Shewanella algae	CCUG-72638	GCA_017580425.1	Contig	4.87614	JADZHL01	60	4194
Shewanella algae	CCUG-72678	GCA_017580415.1	Contig	4.87023	JADZHK01	46	4204
Shewanella algae	CCUG-789	GCA_017580705.1	Contig	4.86334	JADZHX01	62	4258
Shewanella algae	HUD-D8	GCA_017579985.1	Contig	4.83199	JADZGT01	36	4198
Shewanella algae	HUD-G3	GCA_017580065.1	Contig	4.98058	JADZGS01	69	4310
Shewanella algae	HUD-H4	GCA_017580015.1	Contig	4.93228	JADZGR01	60	4319
Shewanella algae	HUD-I2	GCA_017580005.1	Contig	4.93298	JADZGQ01	61	4320
Shewanella algae	SF7	GCA_017580025.1	Contig	4.84361	JADZGP01	51	4205
Shewanella algae	MARS 14	GCA_000947195.1	Scaffold	5.00585	CDQH01	11	4283
Shewanella algae	CSB04KR	GCA_001858195.1	Scaffold	4.80336	MBFW01	64	4167
Shewanella algae	MN-01	GCA_002237105.1	Scaffold	4.76513	LIRM01	102	4123
Shewanella algae	YHL	GCA_002318995.1	Scaffold	4.85044	LVDU01	27	4198
Shewanella algae	20-23R	GCA_002836995.1	Scaffold	4.75878	NIJL01	56	4103
Shewanella algae	AC	GCA_003024535.1	Scaffold	4.75335	LVDH01	28	4130
Shewanella algae	SYT4	GCA_003024575.1	Scaffold	4.83965	LVDK01	37	4182
Shewanella algae	ACCC	GCA_003025175.1	Scaffold	4.7448	LVCY01	74	4151
Shewanella algae	CHL	GCA_007595205.1	Scaffold	4.88859	LVDF01	55	4226
Shewanella algae	CLS3	GCA_007595375.1	Scaffold	4.60313	LVDX01	128	3978
Shewanella algae	CLS4	GCA_007595165.1	Scaffold	4.86675	LVDD01	35	4161
Shewanella algae	CLS5	GCA_007595175.1	Scaffold	4.82409	LVDE01	43	4228
Shewanella algae	melkephyllucas	GCA_007595215.1	Scaffold	4.80822	LVDG01	51	4193
Shewanella algae	SYT2	GCA_007595325.1	Scaffold	4.78253	LVDT01	37	4141
Shewanella algae	SYT3	GCA_007595405.1	Scaffold	4.82342	LVDW01	80	4200
Shewanella algae	JFC3	GCA_007636355.1	Scaffold	4.81965	LVCX01	43	4182
Shewanella algae	JFL	GCA_007636455.1	Scaffold	4.80111	LVDI01	41	4166
Shewanella algae	RC	GCA_007636395.1	Scaffold	4.80724	LVCZ01	54	4152
Shewanella algae	YTH	GCA_007636365.1	Scaffold	4.81183	LVDA01	52	4155
Shewanella algae	YTL	GCA_007636415.1	Scaffold	4.78583	LVDB01	60	4175
Shewanella algae	JFC2	GCA_007844895.1	Scaffold	4.84012	LUKM01	44	4188
Shewanella algae	JFC1	GCA_007860205.1	Scaffold	4.80334	LUJI01	91	4225
Shewanella algae	SYC	GCA_008119825.1	Scaffold	4.77072	LVDC01	49	4152
Shewanella algae	A3/19	GCA_014444625.1	Scaffold	4.94429	JACDTT01	276	4317
Shewanella algae	590722	GCA_017580335.1	Scaffold	4.99247	JADZHH01	74	4318
Shewanella algae	SA2	GCA_004153715.2	Contig	5.07186	NZ_LSHE00000000.1	108	4481
Shewanella algae	JCM 14758	GCA_000614935.1	Contig	4.92992	BALL01	125	0
Shewanella algae	JCM 21037 = NBRC 103173	GCA_000615045.1	Contig	4.82769	BALO01	108	0
Shewanella algae	38A_GOM-205m	GCA_000518445.1	Scaffold	4.73935	JADP01	57	4138
Shewanella algicola	JCM 31091	GCA_014648035.1	Contig	4.93824	BMQI01	175	4233
Shewanella algidipiscicola	1Shewanella algidipiscicola H1	GCA_900380485.1	Contig	4.13838	OXJV01	22	3494
Shewanella algidipiscicola	LMG 23746	GCA_003605125.1	Contig	4.20333	QPQT01	38	3596
Shewanella amazonensis	SB2B	GCA_000015245.1	Complete	4.30614	N/A	1	3662
Shewanella atlantica	HAW-EB5	GCA_003966265.1	Scaffold	5.39213	RXNV01	47	4442
Shewanella baltica	CW2	GCA_003030925.1	Complete	4.94478	N/A	1	3989
Shewanella baltica	128	GCA_003052765.1	Complete	4.89621	N/A	1	3986
Shewanella baltica	NCTC10737	GCA_900636855.1	Complete	4.99975	N/A	1	4064
Shewanella baltica	M1	GCA_001620325.1	Contig	5.16758	LWED01	91	4256
Shewanella baltica	NCTC10735	GCA_900456975.1	Contig	5.30084	UGYM01	2	4386
Shewanella baltica	UBA8873	GCA_003516645.1	Scaffold	3.8935	DPCR01	600	3633
Shewanella baltica	30PF3	MG717483.1	Partial sequence	0.001014	N/A	N/A	N/A
Shewanella baltica	OS155	GCA_000015845.1	Complete	5.3429	N/A	5	4352
Shewanella baltica	OS625	GCA_000231345.2	Contig	5.19524	AGEX01	53	4272
Shewanella baltica	BA175	GCA_000147735.3	Complete	5.1994	N/A	3	4279
Shewanella baltica	OS117	GCA_000215895.1	Complete	5.52602	N/A	4	4558
Shewanella baltica	OS183	GCA_000179535.2	Chromosome	5.04993	N/A	1	4167
Shewanella baltica	OS185	GCA_000017325.1	Complete	5.31291	N/A	2	4387
Shewanella baltica	OS195	GCA_000018765.1	Complete	5.54754	N/A	4	4627
Shewanella baltica	OS223	GCA_000021665.1	Complete	5.35888	N/A	4	4378
Shewanella baltica	OS678	GCA_000178875.2	Complete	5.36877	N/A	2	4432
Shewanella benthica	DB21MT-2	GCA_900476435.1	Complete	4.35351	N/A	1	3455
Shewanella benthica	KT99	GCA_000172075.1	Contig	4.35159	ABIC01	129	3445
Shewanella benthica	DSM 8812	GCA_015069875.1	Scaffold	4.03451	JADDKM01	46	3298
Shewanella bicestrii	JAB-1	GCA_002216875.1	Complete	5.00441	N/A	3	4211
Shewanella canadensis	HAW-EB2	GCA_003966225.1	Contig	5.67692	RXNU01	60	4733
Shewanella carassii	CGMCC 1.16033	GCA_014644375.1	Scaffold	4.37058	BMKO01	38	3806
Shewanella carassii	08MAS2251	GCA_002777975.1	Scaffold	4.37529	NGVS01	46	3810
Shewanella chilikensis	DC57	GCA_011106835.1	Complete	4.91043	N/A	1	4203
Shewanella chilikensis	JC5	GCA_003217175.1	Scaffold	4.44126	QJSY01	90	3842
Shewanella chilikensis	KCTC 22540	GCA_014651975.1	Scaffold	4.43497	BMXX01	119	3831
Shewanella colwelliana	CSB03KR	GCA_001735525.1	Scaffold	4.64254	MCBT01	52	4009
Shewanella colwelliana	ATCC 39565	GCA_000518705.1	Scaffold	4.57562	JAEC01	58	3893
Shewanella corallii	A687	GCA_003353085.1	Contig	5.21504	QRCS01	284	4646
Shewanella cyperi	FJAT-53726	GCA_017354925.1	Complete	4.13607	N/A	1	3534
Shewanella decolorationis	sesselensis	GCA_004354305.1	Chromosome	4.71936	N/A	1	4024
Shewanella decolorationis	Ni1-3	GCA_007923045.4	Complete	5.28836	N/A	2	4410
Shewanella decolorationis	S12	GCA_000485795.1	Scaffold	4.84397	AXZL01	77	4094
Shewanella denitrificans	OS217	GCA_000013765.1	Complete	4.54591	N/A	1	3765
Shewanella donghaensis	LT17	GCA_007567505.1	Complete	4.91277	N/A	1	4007
Shewanella fidelis	ATCC BAA-318	GCA_000518605.1	Scaffold	4.79869	JADX01	27	4059
Shewanella fodinae	KCTC 22506	GCA_014651955.1	Contig	3.90572	BMXW01	50	3468
Shewanella fodinae	74A	GCA_004342405.1	Scaffold	4.03497	SLWF01	91	3562
Shewanella frigidimarina	Ag06-30	GCA_001529365.1	Contig	4.79663	LRDC01	100	4042
Shewanella frigidimarina	UBA11170	GCA_003500745.1	Scaffold	3.9621	DNQQ01	550	4068
Shewanella frigidimarina	KCCM 41815	GCA_003797845.1	Scaffold	4.85481	RKKC01	57	4071
Shewanella frigidimarina	KCTC 23109	GCA_003797125.1	Scaffold	4.78407	RKKE01	19	4019
Shewanella frigidimarina	CG_2015-04_42_94	GCA_009994665.1	Scaffold	4.65443	JAACRB01	57	3898
Shewanella frigidimarina	NCIMB 400	GCA_000014705.1	Complete	4.84526	N/A	1	4001
Shewanella gelidii	JCM 30804	GCA_014647855.1	Scaffold	3.90484	BMPZ01	38	3339
Shewanella hafniensis	T2.3D-1.1	GCA_902728295.3	Contig	4.67945	CACVBT03	107	4068
Shewanella halifaxensis	6JANF4-E-4	GCA_003112715.1	Contig	5.46284	BFBQ01	5	4644
Shewanella halifaxensis	HAW-EB4	GCA_000019185.1	Complete	5.22692	N/A	1	4293
Shewanella hanedai	JCM 20706	GCA_007197645.1	Contig	5.93903	VKGK01	86	4900
Shewanella indica	KJW27	GCA_002836975.1	Scaffold	4.40281	NIJK01	55	3796
Shewanella indica	KCTC 23171	GCA_014652115.1	Scaffold	4.39691	BMYE01	67	3786
Shewanella insulae	JBTF-M18	GCA_009831655.1	Contig	4.67254	WRPA01	51	3921
Shewanella inventionis	CGMCC 1.15339	GCA_014641855.1	Scaffold	4.9615	BMII01	135	4168
Shewanella japonica	KCTC 22435	GCA_002075795.1	Complete	4.97568	N/A	1	4056
Shewanella japonica	KCTC 12235	GCA_003605145.1	Contig	4.83139	QPQU01	41	4026
Shewanella japonica	P1-14-1	GCA_001401775.1	Contig	4.91642	LKTL01	150	4148
Shewanella khirikhana	TH2012	GCA_003957745.1	Complete	4.859	N/A	2	4104
Shewanella litoralis	JCM 32306	GCA_014648335.1	Scaffold	4.60151	BMQX01	101	3864
Shewanella litorisediminis	SMK1-12	GCA_016834455.1	Complete	4.23777	N/A	1	3626
Shewanella livingstonensis	LMG 19866	GCA_003855395.1	Complete	4.83988	N/A	1	4006
Shewanella loihica	PV-4	GCA_000016065.1	Complete	4.60259	N/A	1	3891
Shewanella mangrovi	YQH10	GCA_000753795.1	Contig	4.21579	JPEO01	49	3686
Shewanella marina	JCM 15074	GCA_000614975.1	Contig	4.42465	BALM01	75	3524
Shewanella marisflavi	EP1	GCA_002215585.1	Complete	4.32145	N/A	1	3650
Shewanella marisflavi	ECSMB14101	GCA_006494755.1	Complete	4.34349	N/A	1	3655
Shewanella maritima	D4-2	GCA_004295345.1	Complete	4.71801	N/A	1	3776
Shewanella morhuae	CW7	GCA_003028295.1	Contig	4.2857	PYSG01	3	3492
Shewanella morhuae	NCTC10736	GCA_900457045.1	Contig	4.62617	UGYV01	7	3815
Shewanella morhuae	ATCC BAA-1205	GCA_900156405.1	Scaffold	4.19037	FTNN01	32	3473
Shewanella oneidensis	S2_009_000_R2_72	GCA_003241225.1	Scaffold	4.80102	QFOM01	95	4089
Shewanella oneidensis	MR-1	GCA_013267215.1	Chromosome	4.97234	N/A	1	4138
Shewanella pealeana	ATCC 700345	GCA_000018285.1	Complete	5.17458	N/A	1	4234
Shewanella piezotolerans	WP3	GCA_000014885.1	Complete	5.39648	N/A	1	4390
Shewanella polaris	SM1901	GCA_006385555.1	Complete	4.64854	N/A	1	3863
Shewanella psychromarinicola	M2	GCA_003855155.1	Chromosome	5.13495	N/A	1	4195
Shewanella psychromarinicola	R106	GCA_003797165.1	Scaffold	5.09425	RKKB01	53	4193
Shewanella psychrophila	WP2	GCA_002005305.1	Complete	6.35341	N/A	1	5285
Shewanella putrefaciens	WS13	GCA_003044255.1	Complete	4.38446	N/A	1	3227
Shewanella putrefaciens	NCTC12093	GCA_900636665.1	Complete	5.0494	N/A	1	4209
Shewanella putrefaciens	FDAARGOS_681	GCA_009730575.1	Complete	4.65962	N/A	1	3940
Shewanella putrefaciens	ATCC 8071	GCA_016406325.1	Complete	4.38633	N/A	1	3697
Shewanella putrefaciens	CGMCC-1.6515	GCA_016406305.1	Complete	4.5754	N/A	1	3810
Shewanella putrefaciens	XY07	GCA_017068195.1	Complete	4.38624	N/A	1	3696
Shewanella putrefaciens	NCTC10695	GCA_900457065.1	Contig	4.50006	UGYP01	3	3767
Shewanella putrefaciens	97	GCA_003315425.1	Scaffold	4.95454	QNSC01	45	4193
Shewanella putrefaciens	CIP69.34	AF324211	Partial sequence	0.001909	N/A	N/A	N/A
Shewanella putrefaciens	HRCR-6	GCA_000519065.1	Scaffold	3.63135	JAEU01	250	2906
Shewanella putrefaciens	200	GCA_000169215.2	Complete	4.84025	N/A	1	4145
Shewanella putrefaciens	CN-32	GCA_000016585.1	Complete	4.65922	N/A	1	3939
Shewanella putrefaciens	JCM 20190	GCA_000615005.1	Contig	4.32798	BALN01	49	3072
Shewanella saliphila	JCM 32304	GCA_014648295.1	Scaffold	4.62135	BMQV01	126	3910
Shewanella schlegeliana	JCM 11561	GCA_016765635.1	Scaffold	4.8729	JAESVD01	29	4045
Shewanella sedimentimangrovi	FJAT-52962	GCA_017354965.1	Complete	4.24236	N/A	1	3633
Shewanella sediminis	HAW-EB3	GCA_000018025.1	Complete	5.51767	N/A	1	4529
Shewanella sp.	CSH_ALOHA_XIX_Bin₂	GCA_004566245.1	Contig	1.59854	SPLD01	402	0
Shewanella sp.	RGIG9240	GCA_017635155.1	Contig	2.47498	JAGBMC01	1061	2869
Shewanella sp.	12P2G11	MG717479.1	Partial sequence	0.001014	N/A	N/A	N/A
Shewanella sp.	15P3A4	MG717480.1	Partial sequence	0.001014	N/A	N/A	N/A
Shewanella sp.	CG 4 10 14 0 8 um filter 42 13	GCA_002784445.1	Scaffold	4.87494	PFLD01	93	4260
Shewanella sp.	CG 4 10 14 3 um filter 42 91	GCA_002783895.1	Scaffold	4.73362	PFJF01	55	4089
Shewanella sp.	CG_4_9_14_0_8_um_filter_42_14	GCA_002789495.1	Scaffold	4.62089	PFTI01	43	3968
Shewanella sp.	CG18 big fil WC 8 21 14 2 50 42 11	GCA_002770875.1	Scaffold	4.83425	PCTY01	69	4200
Shewanella sp.	10N.286.51.B7	GCA_002873615.1	Scaffold	4.86107	MCUF01	108	3993
Shewanella sp.	DW31	GCA_015767295.2	Contig	4.94218	JADWMP02	64	4110
Shewanella sp.	JCM 19057	GCA_001310535.1	Contig	4.89958	BAXN01	78	0
Shewanella sp.	MR-7	GCA_000014665.1	Complete	4.79911	N/A	2	4022
Shewanella sp.	RCRI7	GCA_016774375.1	Contig	4.46431	JAEUAZ01	2858	0
Shewanella sp.	SE1	GCA_010214955.1	Contig	4.53202	JAAEJW01	119	3899
Shewanella sp.	SR43-8	GCA_014163775.1	Scaffold	4.67328	JACJDX01	67	3919
Shewanella sp.	UCD-FRSSP16_17	GCA_001675935.1	Contig	4.96018	LZFV01	50	4142
Shewanella sp.	WE21	GCA_002966515.1	Complete	5.26675	N/A	1	4381
Shewanella sp.	YLB-07	GCA_009377275.1	Scaffold	7.29515	VOQB01	43	5921
Shewanella sp.	NORP143	GCA_002732765.1	Contig	2.30868	NVSK01	47	1911
Shewanella sp.	Glo_26	GCA_003353675.1	Contig	4.88312	PIWH01	1103	0
Shewanella sp.	MAG-BB-1	GCA_004195335.1	Contig	5.93655	SDWK01	1061	0
Shewanella sp.	HS_Bin2	GCA_015163755.1	Contig	2.41375	JAAOIN01	348	2161
Shewanella sp.	NORP246	GCA_016764815.1	Contig	4.17619	JAESRC01	642	3743
Shewanella sp.	UBA8824	GCA_003486485.1	Scaffold	4.56777	DNHG01	416	4438
Shewanella sp.	UBA12176	GCA_003517635.1	Scaffold	4.29384	DPAE01	149	3877
Shewanella sp.	DT_112	GCA_013214165.1	Scaffold	4.80522	JABSSM01	181	3966
Shewanella sp.	10N.286.48.A6	GCA_002873135.1	Scaffold	4.64992	MCVI01	104	3816
Shewanella sp.	10N.286.48.B5	GCA_002874355.1	Scaffold	4.7135	MCVG01	181	3891
Shewanella sp.	10N.286.52.B9	GCA_002873635.1	Scaffold	4.68844	MCTY01	238	3826
Shewanella sp.	10N.286.52.C2	GCA_002874545.1	Scaffold	4.54742	MCTV01	88	3741
Shewanella sp.	11B5	GCA_002836795.1	Contig	4.25295	PJAP01	1135	3811
Shewanella sp.	4t3-1-2LB	GCA_017368415.1	Scaffold	4.1304	JAFNJD01	201	3661
Shewanella sp.	Actino-trap-3	GCA_002836275.1	Contig	4.55409	PJCE01	1	3766
Shewanella sp.	ALD9	GCA_002836315.1	Scaffold	4.94121	PJCD01	44	4179
Shewanella sp.	ANA-3	GCA_000203935.1	Complete	5.25115	N/A	2	4387
Shewanella sp.	Arc9-LZ	GCA_010092445.1	Complete	4.91103	N/A	1	4048
Shewanella sp.	BC20	GCA_003129585.1	Contig	4.77298	NHRI01	54	4064
Shewanella sp.	BF02_Schw	GCA_014596695.2	Contig	5.30424	JABKAW02	29	4507
Shewanella sp.	Bg11-22	GCA_002836615.1	Contig	5.03025	PJAZ01	76	4239
Shewanella sp.	CG12_big_fil_rev_8_21_14_0_65_47_15	GCA_002783505.1	Scaffold	4.71738	PFGL01	72	3960
Shewanella sp.	Choline-02u-19	GCA_002836205.1	Contig	5.10298	PJBE01	13	4294
Shewanella sp.	cp20	GCA_000832025.1	Contig	4.47455	JPII01	63	3723
Shewanella sp.	DC2-4	GCA_013248875.1	Contig	5.27601	JABRVR01	4	4388
Shewanella sp.	DNRA4	GCA_012843185.1	Contig	4.67242	JABAIP01	64	3895
Shewanella sp.	ECSMB14102	GCA_000813075.1	Contig	4.41244	JWGX01	154	3836
Shewanella sp.	FDAARGOS_354	GCA_002209245.2	Complete	5.06998	N/A	2	4206
Shewanella sp.	FJAT-51800	GCA_017354945.1	Complete	4.20168	N/A	1	3587
Shewanella sp.	FJAT-53720	GCA_017354985.1	Complete	4.13636	N/A	1	3543
Shewanella sp.	GutCb	GCA_002836135.1	Contig	5.15684	PJBL01	106	4340
Shewanella sp.	GutDb-MelDb	GCA_002836075.1	Contig	4.99473	PJBM01	265	4232
Shewanella sp.	HN-41	GCA_000217915.2	Contig	4.41403	AFOZ01	47	3608
Shewanella sp.	Iso12	GCA_012030025.1	Contig	4.97391	JAAUHW01	57	4363
Shewanella sp.	ISTPL2	GCA_013283205.1	Scaffold	5.17315	JAAPAV01	10	4330
Shewanella sp.	KCT	GCA_007636505.1	Scaffold	4.79083	LVDJ01	40	4096
Shewanella sp.	KX20019	GCA_016757755.1	Complete	5.32922	N/A	2	4442
Shewanella sp.	LC2	GCA_006385775.1	Contig	5.35569	VFSJ01	147	4613
Shewanella sp.	LC6	GCA_006385735.2	Complete	5.51963	N/A	3	4695
Shewanella sp.	LZH-2	GCA_016859145.1	Complete	4.63453	N/A	1	3891
Shewanella sp.	MEBiC00475	GCA_005234075.1	Complete	4.72852	N/A	1	3944
Shewanella sp.	MR-4	GCA_000014685.1	Complete	4.70629	N/A	1	3910
Shewanella sp.	MSW	GCA_007636515.1	Scaffold	4.49746	LVDR01	39	3885
Shewanella sp.	OPT22	GCA_004168585.1	Scaffold	4.42515	PGVH01	69	3799
Shewanella sp.	Pdp11	GCA_002838165.1	Complete	4.9737	N/A	1	4092
Shewanella sp.	POL2	GCA_000282755.1	Contig	4.91395	AKZL01	242	4135
Shewanella sp.	S-1	GCA_012584455.1	Scaffold	5.03599	JABAEB01	26	4229
Shewanella sp.	SACH	GCA_001887095.2	Scaffold	4.91908	MPDG02	49	4086
Shewanella sp.	Scap07	GCA_013394145.1	Complete	5.12964	N/A	1	4381
Shewanella sp.	SG41-3	GCA_014164545.1	Scaffold	4.61814	JACJFJ01	52	3832
Shewanella sp.	SG41-4	GCA_014164505.1	Scaffold	5.00328	JACJFI01	808	4296
Shewanella sp.	SG44-2	GCA_014164215.1	Scaffold	4.67903	JACJEU01	132	3928
Shewanella sp.	SG44-6	GCA_014164185.1	Scaffold	5.05339	JACJER01	404	4263
Shewanella sp.	Shew256	GCA_002196695.1	Contig	5.34014	NAJR01	64	4642
Shewanella sp.	SHSM-M6	GCA_012911865.1	Contig	4.2452	JAAXYH01	39	3621
Shewanella sp.	SNU WT4	GCA_006494715.1	Complete	4.1297	N/A	2	3454
Shewanella sp.	SR41-2	GCA_014164055.1	Contig	3.31378	JACJEJ01	1458	3569
Shewanella sp.	SR43-4	GCA_014163845.1	Scaffold	4.71391	JACJEB01	87	3935
Shewanella sp.	SR44-3	GCA_014163735.1	Scaffold	4.0411	JACJDV01	166	3456
Shewanella sp.	SR44-4	GCA_014163715.1	Scaffold	5.01173	JACJDU01	209	4210
Shewanella sp.	TC10	GCA_009663145.1	Contig	4.99057	VKHR01	129	4107
Shewanella sp.	UCD-KL12	GCA_001957125.1	Contig	5.69153	MPHJ01	61	4742
Shewanella sp.	UCD-KL21	GCA_001957135.1	Contig	4.59877	MPHK01	84	3770
Shewanella sp.	VB17	GCA_013248905.1	Contig	5.1727	JABRVS01	2	4175
Shewanella sp.	W3-18-1	GCA_000015185.1	Complete	4.70838	N/A	1	4027
Shewanella sp.	WPAGA9	GCA_014840975.1	Complete	4.94299	N/A	1	4069
Shewanella sp.	WXL01	GCA_012263345.1	Scaffold	4.70055	JAAIKQ01	37	3812
Shewanella sp.	XMDDZSB0408	GCA_009647595.1	Scaffold	3.9918	WJHV01	38	3237
Shewanella sp.	YLB-06	GCA_007197555.1	Complete	6.4492	N/A	1	5042
Shewanella sp.	YLB-08	GCA_007004545.2	Complete	5.78546	N/A	1	4698
Shewanella sp.	YLB-09	GCA_009372175.1	Complete	6.22549	N/A	1	5124
Shewanella sp.	ZOR0012	GCA_000798835.1	Scaffold	4.9532	JTLE01	94	4227
Shewanella ulleungensis	JCM 32305	GCA_014648315.1	Contig	4.63752	BMQW01	44	3884
Shewanella vesiculosa	CG_2015-05_42_77	GCA_009994445.1	Scaffold	4.62776	JAACRJ01	41	3855
Shewanella vesiculosa	CG_2015-06_42_33	GCA_009994365.1	Scaffold	4.5532	JAACRN01	26	3795
Shewanella vesiculosa	CG_2015-07_42_57	GCA_009994185.1	Scaffold	4.61202	JAACRW01	55	3865
Shewanella vesiculosa	CG_2015-08_42_61	GCA_009994065.1	Scaffold	4.46345	JAACSD01	30	3714
Shewanella vesiculosa	CG_2015-09_42_97	GCA_009993915.1	Scaffold	4.55157	JAACSM01	51	3782
Shewanella vesiculosa	CG_2015-10_42_47	GCA_009993825.1	Scaffold	4.65221	JAACSQ01	68	3888
Shewanella vesiculosa	CG_2015-19_42_30	GCA_009993165.1	Scaffold	4.60138	JAACTY01	46	3840
Shewanella vesiculosa	LMG 24424	GCA_003797885.1	Scaffold	4.72264	RKKD01	45	3929
Shewanella violacea	DSS12	GCA_000091325.1	Complete	4.9621	N/A	1	3888
Shewanella waksmanii	ATCC BAA-643	GCA_000518805.1	Scaffold	4.97148	JAEH01	82	4276
Shewanella woodyi	Alg231_23	GCA_900079515.1	Contig	5.81772	FKJK01	23	4886
Shewanella woodyi	ATCC 51908	GCA_000019525.1	Complete	5.9354	N/A	1	4870
Shewanella xiamenensis	Sh95	GCA_001308045.1	Contig	4.82087	LGYY01	289	4025
Shewanella xiamenensis	T17	GCA_001723195.1	Contig	5.36819	LDOA01	2	4531
Shewanella xiamenensis	AS58	GCA_002738015.1	Contig	4.66178	PEGD01	16	3913
Shewanella xiamenensis	SxND_W2_2018	GCA_012490345.1	Contig	4.59942	BLRE01	107	3905
Shewanella xiamenensis	SxND_W5_2018	GCA_012490465.1	Contig	4.87331	BLRF01	177	4114
Shewanella xiamenensis	SxND_W9_2018	GCA_012490605.1	Contig	4.52355	BLRG01	145	3822
Shewanella xiamenensis	JCM 16212	GCA_014647135.1	Contig	4.60067	BMOP01	68	3861
Shewanella xiamenensis	BC01	GCA_000712635.2	Scaffold	4.67259	JGVI01	110	3948
Shewanella xiamenensis	ZYW2	GCA_007595225.1	Scaffold	4.82125	LVDM01	59	4102
Shewanella xiamenensis	ZYW3	GCA_007595265.1	Scaffold	4.82815	LVDN01	58	4098
Shewanella xiamenensis	ZYW4	GCA_007595275.1	Scaffold	4.8279	LVDO01	60	4099
Shewanella xiamenensis	ZYW5	GCA_007595335.1	Scaffold	4.82972	LVDP01	56	4105
Shewanella xiamenensis	ZYW6	GCA_007595285.1	Scaffold	4.76519	LVDQ01	40	4032
Shewanella xiamenensis	ZYW1	GCA_007636465.1	Scaffold	4.82846	LVDL01	60	4103
Shewanella xiamenensis	DCB2-1	GCA_003130545.1	Contig	4.73663	QFLG01	100	3992
