# Supplementary material for: Novel Mobile Integrons and Strain-Specific Integrase Genes within <em>Shewanella</em> spp. Unveil Multiple Lateral Genetic Transfer Events within the Genus
Source: Preprints.org preprint supplement (doi:10.20944/preprints202204.0173.v1), 2022-04-19
Supplement: Supplementary file 3 [file supplementary]

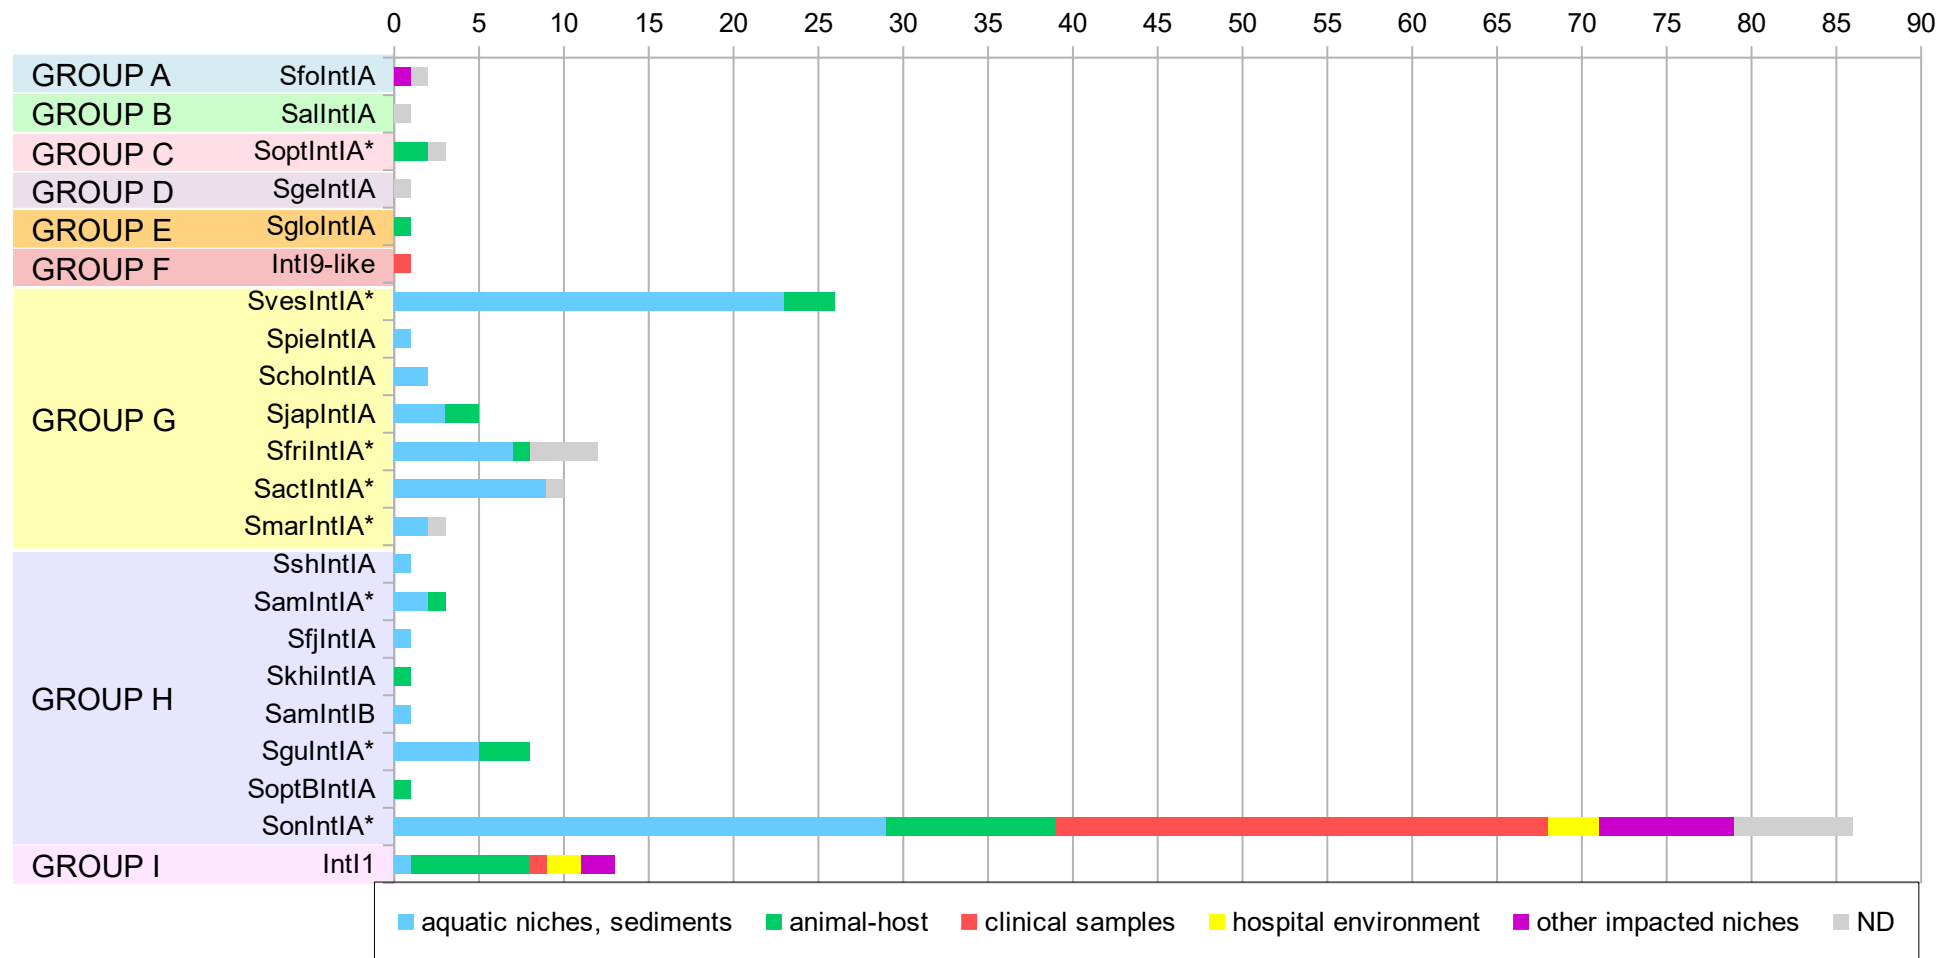

**Figure S4.** Source of integron integrases found in *Shewanella* spp..

\* Indicate include IntI-like type.
