# Supplementary material for: Novel Mobile Integrons and Strain-Specific Integrase Genes within <em>Shewanella</em> spp. Unveil Multiple Lateral Genetic Transfer Events within the Genus
Source: Preprints.org preprint supplement (doi:10.20944/preprints202204.0173.v1), 2022-04-19
Supplement: Supplementary file 3 [file Table S2. Similarity and Identity of all integron integrase found in Shewanella spp..xlsx]

## Sheet: Sheet1
Table S2. Similarity and Identity of all integron integrase found in Shewanella spp.
				Identity
				Similarity
		1	2	3	4	5	6	7	8	9	10	11	12	13	14	15	16	17	18	19	20	21	22	23	24	25	26	27	28	29	30	31	32	33	34	35	36	37	38	39	40	41	42	43	44	45	46	47	48
1	XerCEco		49	38	34.9	26.2	26.5	25.4	26.2	24.2	25.5	26.4	24.3	24.9	24.5	25	24.7	25.6	23.6	24.4	27	26.8	24	24	24	24	24	24	24	24	24	24	24	24	24	23.8	23	24.4	23.7	24.4	24.1	24.7	23.1	25.1	24.3	24.5	23.3	23.9	22.2
2	XerCSonMR1	68		34	30.9	26.8	26.2	23.9	26.1	26.4	26.3	26.1	23.9	23.1	26.1	24.6	23.9	25	23.1	23.7	22.9	22.4	22.4	22.4	22.4	22.4	22.4	22.4	22.4	22.4	22.4	22.4	22.4	22.4	22.4	22.1	22.6	21.9	22.4	22.4	22.6	22.7	22.1	22.3	21.8	22.9	21	21.3	22.2
3	XerDKpneu	58.4	56.9		61.8	27.8	27.8	27.8	27.4	25.7	29.2	27.4	28.5	28.8	30.5	27.6	27.7	28.7	26.6	26	26.4	26.5	25.4	25.4	25.4	25.4	25.4	25.4	25.4	25.4	25.4	25.4	25.4	25.4	25.4	25.4	24.9	26.5	25.4	25.1	24.9	24.6	25.1	24.4	23.7	23.4	24.6	24.3	23.3
4	XerDSonMR1	57	55.2	76		29.6	29.6	28.8	28.9	26	28.4	25.1	28.9	29.2	26.4	26.5	25.4	27.2	25.1	26	24.3	25.4	23.1	23.1	23.1	23.1	23.1	23.1	23.1	23.1	23.1	23.1	23.1	23.1	22.8	22.8	23.1	23.3	23.1	23.1	22.7	22.6	22.6	23.4	22.6	23.1	22.6	22.4	22.3
5	S. fodinae 74A	47.2	47.8	48.8	48.8		98.5	55.6	52.1	50	55.4	53.1	52.5	52.5	52.2	51.9	52.5	47.4	40.4	40.1	35.8	33.4	38.8	38.8	38.8	38.8	38.8	38.8	38.8	38.8	38.8	38.8	38.8	38.8	38.5	38.5	38.8	37.6	38.5	38.5	38.8	38.8	38.5	38.2	37.1	36.7	35.4	36	34
6	S. fodinae KCTC 22506	47.5	47.8	48.8	49.1	98.8		54.3	51.5	49.7	55.1	52.8	52.2	52.2	52.2	51.9	52.5	47.1	40.7	40.4	35.5	33.2	39.1	39.1	39.1	39.1	39.1	39.1	39.1	39.1	39.1	39.1	39.1	39.1	38.8	38.8	39.1	37.9	38.8	38.8	39.1	39.1	38.8	38.5	37.4	37	35.7	36.3	34.3
7	IntI10	46.6	45.6	50	48.1	74.7	74.1		59.1	57.8	53.7	57.5	58.4	60	56.3	56.6	56.6	52.8	38.6	38.3	36.3	34.9	37.9	37.9	37.9	37.9	37.9	37.9	37.9	37.9	37.9	37.9	37.9	37.9	37.9	37.9	37.9	37	37.6	37.6	37.9	37.6	37.6	37.7	37.1	37.6	36.4	36.8	33.6
8	S. algicola JCM 31091 (a)	47.4	45.8	50.2	49.2	72.5	71.9	77.4		55.9	54.4	54.3	54.5	54.2	51.4	51.1	49.2	55.4	43	42.7	36.8	36.7	39	39	39	39	39	39	39	39	39	39	39	39	39	39	39	38.4	38.7	38.7	38.7	38.7	38.4	38.1	38.1	38.1	37.5	38.1	33.2
9	S. sp. OPT22 (a)	46.3	49.4	47.2	49.1	68.8	68.8	72.7	74		69.8	69.9	58.7	58.4	57.5	57.5	56.5	54.2	42.4	41.8	39.6	38.5	40.4	40.4	40.4	40.4	40.4	40.4	40.4	40.4	40.4	40.4	40.4	40.4	40.4	40.4	40.4	39.2	40.1	40.1	40.1	40.1	40.1	39.9	39.6	39.5	39.4	39.6	39.1
10	S. sp. HS_Bin2	47.6	46.6	47.6	50.3	70.7	70.7	71.3	70.4	85.4		67.4	60.1	58.8	57	55.5	56.4	53.8	41.5	41.2	38.3	38.5	41.5	41.5	41.5	41.5	41.5	41.5	41.5	41.5	41.5	41.5	41.5	41.5	41.5	41.5	41.5	40.3	41.2	41.2	41.2	41.8	41.2	41	40.4	39.5	39.5	39.6	37.6
11	S. gelidii JCM 30804	47.8	46	46.3	49.4	70.7	70.7	72.7	71.2	83.9	80.2		59	58.7	55.9	56.8	56.8	54.5	42.4	41.5	38.2	37.8	40.9	40.9	40.9	40.9	40.9	40.9	40.9	40.9	40.9	40.9	40.9	40.9	40.9	40.6	40.9	39.6	40.6	40.6	40.6	41.2	40.2	40.6	39.8	41.7	41.5	42.1	37.6
12	IntI4	47.2	45.6	48.4	49.1	71.9	71.9	75.6	73.4	75.5	75.6	77		94.1	75.6	65.9	66.9	55.6	39.5	39.5	39.7	37.6	38.3	38.3	38.3	38.3	38.3	38.3	38.3	38.3	38.3	38.3	38.3	38.3	38.3	38	38.3	37.1	38	38	38	38	37.7	38.6	38	37.7	38	38	34.2
13	IntI5	46.9	44.7	47.5	49.4	71.9	71.9	75.6	74	74.2	74.4	75.2	97.2		74.4	66.6	66.9	56.5	39.2	39.2	39.7	37.6	38	38	38	38	38	38	38	38	38	38	38	38	38	37.7	38	37.1	37.7	37.7	37.7	37.7	37.4	38	37.4	37.4	38	38	33.6
14	VmeIntIA	48.4	45	48.8	50	69.8	69.4	71.3	73.4	74.2	73.8	74.5	90.6	89.4		65.9	66.6	59.3	38.6	38.3	37.2	34.9	38.2	38.2	38.2	38.2	38.2	38.2	38.2	38.2	38.2	38.2	38.2	38.2	37.9	38.4	38.2	37.3	37.9	37.9	37.9	37.6	37.9	38	37.7	37.9	36.4	36.8	32.8
15	V. sp. DAT722	47.2	45.9	48.4	46.3	69.8	69.4	73.8	72.1	74.8	74.7	74.2	84.1	83.1	84.1		88.4	56.5	38	37.7	38.8	37.1	38.4	38.4	38.4	38.4	38.4	38.4	38.4	38.4	38.4	38.4	38.4	38.4	38.7	38.4	37.9	37.2	38.1	38.1	38.6	38.1	38.6	38.7	38.1	39.5	38.4	38.1	35.8
16	VpaIntIA	47.5	46.3	48.8	47.5	68.8	68.5	74.4	72.1	75.2	74.7	73.9	84.4	82.8	84.7	96.3		57.1	36.8	36.5	38.8	37.1	37.7	37.7	37.7	37.7	37.7	37.7	37.7	37.7	37.7	37.7	37.7	37.7	38	37.7	37.7	36.1	37.4	37.4	37.4	36.8	37.4	38.6	38	39.1	37.1	36.1	36
17	S. sp. Glo_26	45.4	43.2	47.8	48.1	68.2	68.2	72.8	75	74.4	73.2	72.5	77.5	76.9	78.1	76.2	76.9		39.2	38.2	37.7	35.4	37.5	37.5	37.5	37.5	37.5	37.5	37.5	37.5	37.5	37.5	37.5	37.5	37.5	37.5	37.5	36.9	37.2	37.2	36.9	37.5	37.2	36.4	36.3	38.5	36	36.3	34.1
18	AfiIntIA	45.9	44.6	46.5	44.6	63	63	59.6	61.2	64.2	61.6	63	59.6	59.6	59.6	57.8	57.8	61.5		98.2	37.8	36.9	41.9	41.9	41.9	41.9	41.9	41.9	41.9	41.9	41.9	41.9	41.9	41.9	41.9	41.6	41.9	41	41.9	41.9	41.9	41.9	42.2	41.9	41.6	41	41.9	41.9	40.5
19	VfiIntIA	46.5	48	46.2	45.9	62.7	62.7	59.6	61.2	63.6	61.6	62.1	59.9	59.6	59.6	57.5	57.5	60.9	98.8		37.5	36.6	42.2	42.2	42.2	42.2	42.2	42.2	42.2	42.2	42.2	42.2	42.2	42.2	42.2	41.9	42.2	41.3	42.2	42.2	42.2	42.2	42.5	42.2	41.9	41.3	42.2	42.2	40.5
20	S. xiamenensis Sh95 (a)	47	42.2	50	48.7	55.2	54.9	55.9	58.8	57.1	57	56.8	59.4	60	59.1	58.8	58.4	60.5	58.7	58.7		78.7	47.4	47.4	47.4	47.4	47.4	47.4	47.4	47.4	47.4	47.4	47.4	47.4	47.4	47.4	47.4	46.9	47.4	47.7	47.4	48.3	48.3	48.4	48.1	47.1	45.9	46.6	42.9
21	IntI9	45	40.3	45.6	45.3	53.9	53.9	53.9	57.5	56.1	57.5	56.4	58.3	58.3	58.3	58	57.7	59.4	56.9	57.2	79		46.4	46.4	46.4	46.4	46.4	46.4	46.4	46.4	46.4	46.4	46.4	46.4	46.4	46.4	46.4	46	46.4	46.7	46.4	47.3	47.3	47.4	47.1	45.9	44.4	44.9	45.9
22	S. sp. CG18BIGCG18_big_fil_WC_8_21_14_2_50_42_11	46.4	41.4	46.1	45.8	57.7	58.3	59.7	61	60.9	61.6	63	63.1	61.6	62.8	61.9	60.6	59.9	59.3	59.3	65.5	62.7		100	100	100	100	100	100	100	100	100	100	100	99.7	99.4	99.7	98.1	99.7	99.7	99.1	97.5	96.9	95.6	95.3	90	84	83.7	66.2
23	S. sp. SG44-2	46.4	41.4	46.1	45.8	57.7	58.3	59.7	61	60.9	61.6	63	63.1	61.6	62.8	61.9	60.6	59.9	59.3	59.3	65.5	62.7	100		100	100	100	100	100	100	100	100	100	100	99.7	99.4	99.7	98.1	99.7	99.7	99.1	97.5	96.9	95.6	95.3	90	84	83.7	66.2
24	S. frigidimarina CG_2015-04_42_94	46.4	41.4	46.1	45.8	57.7	58.3	59.7	61	60.9	61.6	63	63.1	61.6	62.8	61.9	60.6	59.9	59.3	59.3	65.5	62.7	100	100		100	100	100	100	100	100	100	100	100	99.7	99.4	99.7	98.1	99.7	99.7	99.1	97.5	96.9	95.6	95.3	90	84	83.7	66.2
25	S. sp. SG44-6	46.4	41.4	46.1	45.8	57.7	58.3	59.7	61	60.9	61.6	63	63.1	61.6	62.8	61.9	60.6	59.9	59.3	59.3	65.5	62.7	100	100	100		100	100	100	100	100	100	100	100	99.7	99.4	99.7	98.1	99.7	99.7	99.1	97.5	96.9	95.6	95.3	90	84	83.7	66.2
26	S. baltica NCTC10737	46.4	41.4	46.1	45.8	57.7	58.3	59.7	61	60.9	61.6	63	63.1	61.6	62.8	61.9	60.6	59.9	59.3	59.3	65.5	62.7	100	100	100	100		100	100	100	100	100	100	100	99.7	99.4	99.7	98.1	99.7	99.7	99.1	97.5	96.9	95.6	95.3	90	84	83.7	66.2
27	S. vesiculosa CG_2015-05_42_77	46.4	41.4	46.1	45.8	57.7	58.3	59.7	61	60.9	61.6	63	63.1	61.6	62.8	61.9	60.6	59.9	59.3	59.3	65.5	62.7	100	100	100	100	100		100	100	100	100	100	100	99.7	99.4	99.7	98.1	99.7	99.7	99.1	97.5	96.9	95.6	95.3	90	84	83.7	66.2
28	S. baltica 128	46.4	41.4	46.1	45.8	57.7	58.3	59.7	61	60.9	61.6	63	63.1	61.6	62.8	61.9	60.6	59.9	59.3	59.3	65.5	62.7	100	100	100	100	100	100		100	100	100	100	100	99.7	99.4	99.7	98.1	99.7	99.7	99.1	97.5	96.9	95.6	95.3	90	84	83.7	66.2
29	S. vesiculosa LMG 24424 (a)	46.4	41.4	46.1	45.8	57.7	58.3	59.7	61	60.9	61.6	63	63.1	61.6	62.8	61.9	60.6	59.9	59.3	59.3	65.5	62.7	100	100	100	100	100	100	100		100	100	100	100	99.7	99.4	99.7	98.1	99.7	99.7	99.1	97.5	96.9	95.6	95.3	90	84	83.7	66.2
30	S. sp. CG_4_10_14_0_8_um_filter_42_13	46.4	41.4	46.1	45.8	57.7	58.3	59.7	61	60.9	61.6	63	63.1	61.6	62.8	61.9	60.6	59.9	59.3	59.3	65.5	62.7	100	100	100	100	100	100	100	100		100	100	100	99.7	99.4	99.7	98.1	99.7	99.7	99.1	97.5	96.9	95.6	95.3	90	84	83.7	66.2
31	S. vesiculosa CG_2015-09_42_97	46.4	41.4	46.1	45.8	57.7	58.3	59.7	61	60.9	61.6	63	63.1	61.6	62.8	61.9	60.6	59.9	59.3	59.3	65.5	62.7	100	100	100	100	100	100	100	100	100		100	100	99.7	99.4	99.7	98.1	99.7	99.7	99.1	97.5	96.9	95.6	95.3	90	84	83.7	66.2
32	S. vesiculosa CG_2015-07_42_57	46.4	41.4	46.1	45.8	57.7	58.3	59.7	61	60.9	61.6	63	63.1	61.6	62.8	61.9	60.6	59.9	59.3	59.3	65.5	62.7	100	100	100	100	100	100	100	100	100	100		100	99.7	99.4	99.7	98.1	99.7	99.7	99.1	97.5	96.9	95.6	95.3	90	84	83.7	66.2
33	S. sp. CG_4_10_14_3_um_filter_42_91	46.4	41.4	46.1	45.8	57.7	58.3	59.7	61	60.9	61.6	63	63.1	61.6	62.8	61.9	60.6	59.9	59.3	59.3	65.5	62.7	100	100	100	100	100	100	100	100	100	100	100		99.7	99.4	99.7	98.1	99.7	99.7	99.1	97.5	96.9	95.6	95.3	90	84	83.7	66.2
34	S. sp. CG_4_9_14_0_8_um_filter_42_14	46.4	41.4	46.1	45.8	57.7	58.3	59.7	60.7	60.6	61.3	62.7	62.8	61.9	62.8	61.9	60.6	60.2	59	59	65.8	63	100	100	100	100	100	100	100	100	100	100	100	100		99.1	99.4	97.8	99.4	99.4	98.7	97.5	96.6	95.3	95	90	84	83.7	66.2
35	S. baltica OS195 (a)	47	41.1	46.1	45.5	57.4	58	59.7	60.7	60.6	61.6	62.4	62.8	61.3	63.1	61.9	60.6	59.6	59	59	65.5	62.7	99.4	99.4	99.4	99.4	99.4	99.4	99.4	99.4	99.4	99.4	99.4	99.4	99.4		99.1	97.5	99.1	99.1	98.4	96.9	96.9	95	94.7	89.3	83.4	83.1	66.2
36	S. sp. SR43-8	45.8	41.4	45.1	45.8	57.7	58.3	59.7	61.3	60.9	61.6	63	63.1	61.6	62.8	61.6	60.6	59.9	59.3	59.3	65.5	62.7	99.7	99.7	99.7	99.7	99.7	99.7	99.7	99.7	99.7	99.7	99.7	99.7	99.7	99.1		97.8	99.4	99.4	98.7	97.2	96.6	95.3	95	89.7	83.7	83.4	65.9
37	S. sp. SR43-4	48.4	41.7	47.5	46.5	56.5	57.1	58.4	60.1	59.6	60.4	61.8	61.9	60.6	61.9	60.3	59.1	59	58.4	58.4	65.6	61.9	98.1	98.1	98.1	98.1	98.1	98.1	98.1	98.1	98.1	98.1	98.1	98.1	98.1	97.5	97.8		97.8	97.8	97.2	95.6	95	93.7	93.4	88.1	82.8	82.8	65.2
38	S. sp. SG41-3 (a)	46.4	41.4	46.1	45.8	57.7	58.3	59.7	61	60.9	61.6	63	63.1	61.6	62.8	61.9	60.6	59.9	59.3	59.3	65.5	62.7	100	100	100	100	100	100	100	100	100	100	100	100	100	99.4	99.7	98.1		99.4	98.7	97.2	96.6	95.3	95	89.7	83.7	83.4	65.9
39	S. denitrificans OS217	47.6	41.4	46.1	45.8	57.7	58.3	59.7	61	60.9	61.6	63	63.1	61.6	62.8	61.9	60.6	59.9	59.3	59.3	65.5	62.7	100	100	100	100	100	100	100	100	100	100	100	100	100	99.4	99.7	98.1	100		99.4	97.8	97.2	95.9	95.6	90.3	84.3	84	66.2
40	S. sp. SR44-3 (a)	47.6	42	46.4	46.4	58	58.6	60	60.7	60.9	61.6	63	62.8	61.3	62.5	61.9	60.3	59.9	59	59	65.2	62.4	99.7	99.7	99.7	99.7	99.7	99.7	99.7	99.7	99.7	99.7	99.7	99.7	99.7	99.1	99.4	97.8	99.7	99.7		97.2	96.6	95.3	95	89.7	83.7	83.4	65.6
41	S. algidipiscicola 1ShewanellaalgidipiscicolaH1	47.3	41.4	46.7	44.8	58	58.6	60	60.4	60.6	61.9	63	62.8	61.6	62.2	61.6	60.3	60.2	58.7	58.7	65.5	62.7	98.4	98.4	98.4	98.4	98.4	98.4	98.4	98.4	98.4	98.4	98.4	98.4	98.4	97.8	98.1	96.6	98.4	98.4	98.1		96.6	95.9	95.6	89.3	83.7	84	66.2
42	S. sp. UCD-KL21	46.7	41.7	46.7	45.1	58	58.6	60.3	60.1	61.2	62.2	63.4	63.1	61.9	62.8	62.2	60.6	60.5	59	59	65.8	63	97.8	97.8	97.8	97.8	97.8	97.8	97.8	97.8	97.8	97.8	97.8	97.8	97.8	97.8	97.5	95.9	97.8	97.8	97.5	98.1		95.3	95	89	83.1	82.8	65.6
43	S. sp. 10N.286.48.A6	46.4	42	46.1	45.8	57.7	58.3	60	60.1	59.9	61.6	64	63.8	62.5	62.8	62.2	60.9	59	59.9	59.9	64.3	61.6	97.8	97.8	97.8	97.8	97.8	97.8	97.8	97.8	97.8	97.8	97.8	97.8	97.8	97.2	97.5	95.9	97.8	97.8	97.5	97.8	97.5		98.1	88.7	83.4	83.1	65.9
44	S. sp. 10N.286.48.B5	44.8	42.3	46.4	45.1	56.5	57.1	60.3	60.4	59.9	61.6	63.4	63.8	62.5	62.5	62.2	60.9	59.6	59.3	59.3	64.6	61.9	97.2	97.2	97.2	97.2	97.2	97.2	97.2	97.2	97.2	97.2	97.2	97.2	97.2	96.6	96.9	95.3	97.2	97.2	96.9	97.2	96.9	98.4		88.4	83.1	82.8	65.6
45	S. sp. DT_112	44.2	42.3	45.1	45.5	56.8	57.4	59.4	59.8	59.6	59.8	63.7	61.9	60.9	62.2	60.3	59.7	59.6	59	59.3	65.5	63.3	96.6	96.6	96.6	96.6	96.6	96.6	96.6	96.6	96.6	96.6	96.6	96.6	96.2	95.9	96.2	94.7	96.6	96.6	96.2	95.9	95.3	95.3	94.7		84.6	84.6	65.6
46	S. woodyi ATCC 51908 (b)	42.6	41.1	44.8	45.5	55.2	55.9	56.9	57.9	59.9	59.1	63	63.4	62.5	63.1	60	59.7	59.6	58.7	59.3	64.3	61.6	93.4	93.4	93.4	93.4	93.4	93.4	93.4	93.4	93.4	93.4	93.4	93.4	93.1	92.8	93.1	91.8	93.4	93.4	93.1	93.1	92.5	93.7	92.8	91.5		98.4	65.3
47	S. hanedai JCM 20706	42.6	41.1	44.8	45.5	54.9	55.6	57.2	58.2	59.6	59.1	63	63.4	62.5	63.8	60	59.7	59.9	58.4	59	64.6	61.9	94	94	94	94	94	94	94	94	94	94	94	94	93.7	93.4	93.7	92.5	94	94	93.7	93.7	93.1	94.4	93.4	92.2	99.4		65.6
48	S. piezotolerans WP3	43.3	39.5	44.4	43.6	53.5	53.8	55	57.6	60.2	58.8	62	59.4	58.8	58.2	58.2	58.2	58.2	58.2	58.2	59.6	65.5	81	81	81	81	81	81	81	81	81	81	81	81	80.7	81	80.7	79.5	81	80.7	80.4	80.4	80.1	79.8	79.5	80.1	79.5	79.8
49	S. sp. Choline-02u-19	45	42.5	41.3	40	48.1	48.5	49.7	50.5	54	52.1	53.4	51.3	51.3	50.9	49.1	48.1	49.4	51.1	50.5	66.4	52.8	71.8	71.8	71.8	71.8	71.8	71.8	71.8	71.8	71.8	71.8	71.8	71.8	71.5	71.8	71.8	71.3	71.8	71.8	71.5	71.5	71.8	71.8	71.2	70.8	70.2	70.2	70.8
50	S. sp. Bg11-22	45	42.5	41.3	40	48.1	48.5	49.7	50.5	54	52.1	53.4	51.3	51.3	50.9	49.1	48.1	49.4	51.1	50.5	66.4	52.8	71.8	71.8	71.8	71.8	71.8	71.8	71.8	71.8	71.8	71.8	71.8	71.8	71.5	71.8	71.8	71.3	71.8	71.8	71.5	71.5	71.8	71.8	71.2	70.8	70.2	70.2	70.8
51	S. japonica P1-14-1	45.9	47.5	48.7	46.5	57.7	58.3	59.1	60.7	62.4	60.4	63.4	61.6	61.9	62.2	61.3	59.7	63	59.9	59.3	65.1	62.7	79.3	79.3	79.3	79.3	79.3	79.3	79.3	79.3	79.3	79.3	79.3	79.3	79	79.3	79	78.3	79.3	79.3	79	79.3	79.3	80.3	79.3	78.7	77.7	78.1	73.1
52	S. sp. WPAGA9	45.9	47.5	48.7	46.5	57.7	58.3	59.1	60.7	62.4	60.4	63.4	61.6	61.9	62.2	61.3	59.7	63	59.9	59.3	65.1	62.7	79.3	79.3	79.3	79.3	79.3	79.3	79.3	79.3	79.3	79.3	79.3	79.3	79	79.3	79	78.3	79.3	79.3	79	79.3	79.3	80.3	79.3	78.7	77.7	78.1	73.1
53	S. japonica KCTC 22435	45.9	47.5	48.7	46.5	57.7	58.3	59.1	60.4	62.1	60.1	63	61.6	61.9	62.2	61.3	59.7	63	59.6	59	65.1	62.7	79.3	79.3	79.3	79.3	79.3	79.3	79.3	79.3	79.3	79.3	79.3	79.3	79	79.3	79	78.3	79.3	79.3	79	79.3	79.3	80.3	79.3	78.7	77.7	78.1	73.1
54	S. japonica KCTC 12235 (a)	43.9	46.3	46.3	45.4	57	57.6	56.4	58.5	60.5	59.3	61.4	57.3	57.6	58.2	56.7	56.4	61.4	57.9	57.3	59.6	60.8	73.6	73.6	73.6	73.6	73.6	73.6	73.6	73.6	73.6	73.6	73.6	73.6	73.3	73.6	73.3	71.8	73.6	73.6	73.3	73.6	73.6	74.5	73.6	73.3	71.2	71.5	72.2
55	S. sp. UCD-FRSSP16_17	45.9	47.5	49.7	45.9	58	58.6	59.4	62.2	63.4	60.7	64	60.9	61.3	61.6	60.9	59.4	62.7	60.6	59.9	65.4	63	79	79	79	79	79	79	79	79	79	79	79	79	78.7	79	78.7	78	79	79	78.7	79	79	79.9	79	79	77.4	77.7	73.4
56	S. livingstonensis LMG 19866	42.9	45.5	46.7	47.6	57.4	57.7	55.9	60.7	61.2	60.4	60.9	62.2	60.6	62.5	59.4	57.8	58.3	60.6	60.9	62.7	61.3	78.7	78.7	78.7	78.7	78.7	78.7	78.7	78.7	78.7	78.7	78.7	78.7	78.7	79	78.4	77.4	78.7	78.7	78.4	78.7	78.7	79.3	78.4	79.9	78.4	78.7	72.8
57	S. psychromarinicola R106	42.9	45.5	46.4	47.3	57.1	57.4	55.6	60.7	61.5	60.4	60.6	61.6	60	61.9	59.1	57.2	58	59.9	60.2	62.7	61.6	78.4	78.4	78.4	78.4	78.4	78.4	78.4	78.4	78.4	78.4	78.4	78.4	78.4	78.7	78.1	77.1	78.4	78.4	78.1	78.4	78.4	79	78.1	79	77.4	78.1	72.5
58	S. psychromarinicola M2	42.9	45.5	46.4	47.3	57.1	57.4	55.6	60.7	61.5	60.4	60.6	61.6	60	61.9	59.1	57.2	58	59.9	60.2	62.7	61.6	78.4	78.4	78.4	78.4	78.4	78.4	78.4	78.4	78.4	78.4	78.4	78.4	78.4	78.7	78.1	77.1	78.4	78.4	78.1	78.4	78.4	79	78.1	79	77.4	78.1	72.5
59	S. frigidimarina Ag06-30	42.9	45.5	46.7	48	57.4	57.7	55.9	60.7	61.2	60.7	60.9	62.2	60.6	62.8	59.4	57.8	58	60.6	61.2	62.4	61.3	78.7	78.7	78.7	78.7	78.7	78.7	78.7	78.7	78.7	78.7	78.7	78.7	78.7	79	78.4	77.4	78.7	78.7	78.4	78.7	78.7	79.3	78.4	79.9	78.7	79	72.5
60	S. algicola JCM 31091 (b)	42.6	45.1	46.4	47.3	57.1	57.4	56.9	61	61.5	60.7	60.9	62.2	60.9	62.8	59.7	58.1	58.6	60.9	60.6	62.1	61.6	78.4	78.4	78.4	78.4	78.4	78.4	78.4	78.4	78.4	78.4	78.4	78.4	78.4	78.7	78.1	77.1	78.4	78.4	78.1	78.4	78.4	79	78.1	79.6	78.1	78.4	72.2
61	S. sp. MEBiC00475	41.4	45.1	45.8	47.3	56.8	57.1	56.6	60.7	60.9	60.1	60.6	61.6	60	61.9	59.4	57.8	58.6	60.2	60.2	61.4	61	78.1	78.1	78.1	78.1	78.1	78.1	78.1	78.1	78.1	78.1	78.1	78.1	78.1	78.4	77.7	76.8	78.1	78.1	77.7	78.1	78.1	78.7	77.7	78.7	77.7	78.4	71.9
62	S. polaris SM1901	42	44.5	46.4	47	56.8	57.1	55.9	60.4	61.8	60.4	60.6	61.6	60	62.5	60.6	57.8	58.3	60.2	60.2	61.8	60.8	78.7	78.7	78.7	78.7	78.7	78.7	78.7	78.7	78.7	78.7	78.7	78.7	78.7	79	78.4	77.4	78.7	78.7	78.4	78.7	78.7	79.3	78.4	79	78.4	78.4	71.9
63	S. ulleungensis JCM 32305	44.2	43.9	47.6	47.3	56.8	57.1	56.9	60.1	61.8	61.3	60.9	60.6	60.9	63.1	61.6	59.1	59.3	60.6	60.9	63.3	60.8	78.7	78.7	78.7	78.7	78.7	78.7	78.7	78.7	78.7	78.7	78.7	78.7	79	78.7	78.4	77.4	78.7	78.7	78.4	79	79	79	78.1	79	77.7	77.7	71.9
64	S. inventionis CGMCC 1.15339	43.9	44.5	47	47	56.8	57.1	56.6	59.8	61.8	61.6	61.5	60.6	60.9	63.1	61.6	59.1	59	60.9	61.2	62.7	60.5	78.1	78.1	78.1	78.1	78.1	78.1	78.1	78.1	78.1	78.1	78.1	78.1	78.4	78.1	77.7	76.8	78.1	78.1	77.7	78.4	78.4	79	78.1	78.4	77.1	77.1	71.9
65	S. donghaensis LT17 (a)	43.9	47	46.4	48	57.1	57.4	58.1	58.5	61.8	61.9	61.8	60.9	60.9	63.8	59.7	59.4	59.3	60.9	60.6	64.6	61.9	78.7	78.7	78.7	78.7	78.7	78.7	78.7	78.7	78.7	78.7	78.7	78.7	79	79	78.4	77.1	78.7	78.7	78.4	79	79	79.3	78.1	78.4	78.4	79	73.4
66	S. aestuarii JCM 17801	45.6	45.3	47.5	44.7	56.2	56.5	57.5	58.5	59.6	59.8	62.4	61.9	60.9	62.8	59.7	59.7	59.9	59.6	59.9	62.2	59.7	77.8	77.8	77.8	77.8	77.8	77.8	77.8	77.8	77.8	77.8	77.8	77.8	77.8	77.8	77.5	76.3	77.8	77.8	77.5	78.1	77.8	78.1	76.9	78.1	78.1	78.4	71.6
67	S. sp. XMDDZSB0408	44.8	46.4	46.1	45.8	56.2	56.5	56.3	59.8	59.3	59.5	62.1	60.6	59.1	61.9	59.7	59.4	58	59	59	61.1	59.1	76.5	76.5	76.5	76.5	76.5	76.5	76.5	76.5	76.5	76.5	76.5	76.5	76.2	76.5	76.2	75.2	76.5	76.5	76.2	76.5	76.5	77.4	76.2	77.4	77.4	78.1	71.6
68	S. sp. Actino-trap-3	46.9	45.6	45.6	48.7	61.1	61.4	60.6	65	62.1	60.7	64	64.4	64.7	65.9	62.2	62.2	63.9	61.8	61.8	69.2	66.6	72.1	72.1	72.1	72.1	72.1	72.1	72.1	72.1	72.1	72.1	72.1	72.1	72.4	71.5	72.1	71.7	72.1	72.1	72.1	72.4	72.4	72.7	71.8	71.8	70.2	70.8	65.8
69	S. sp. SR44-4	46.9	45.6	45.6	48.7	61.1	61.4	60.6	65	62.1	60.7	64	64.4	64.7	65.9	62.2	62.2	63.9	61.8	61.8	69.2	66.6	72.1	72.1	72.1	72.1	72.1	72.1	72.1	72.1	72.1	72.1	72.1	72.1	72.4	71.5	72.1	71.7	72.1	72.1	72.1	72.4	72.4	72.7	71.8	71.8	70.2	70.8	65.8
70	S. vesiculosa LMG 24424 (b)	42.6	39.5	40.6	44.7	53.4	53.7	53.1	57.6	54.7	54	56.5	56.9	57.2	58.8	55	55	56.8	54.4	54.4	66.3	59.7	65.2	65.2	65.2	65.2	65.2	65.2	65.2	65.2	65.2	65.2	65.2	65.2	65.5	64.6	65.2	65.9	65.2	65.2	65.2	65.5	65.5	65.8	64.9	64.9	63	63.6	58.8
71	S. sp. SG41-3 (b)	46.7	45.4	46.4	48.3	61.4	61.7	60.6	63.8	62.4	60.1	62.7	63.8	64.1	64.4	61.6	61.9	63.3	60.6	60.6	69.1	66.3	70.5	70.5	70.5	70.5	70.5	70.5	70.5	70.5	70.5	70.5	70.5	70.5	70.8	70.5	70.5	70.3	70.5	70.5	70.5	70.8	71.5	71.2	70.2	69.9	68.7	69	64.6
72	S. saliphila JCM 32304	45.9	45	46.5	49.1	61.4	61.7	60.3	65	62.4	60.4	64	63.8	64.1	64.7	62.5	62.5	63.6	61.2	60.6	69.2	66.6	71.8	71.8	71.8	71.8	71.8	71.8	71.8	71.8	71.8	71.8	71.8	71.8	72.1	71.5	71.8	72	71.8	71.8	71.8	72.1	72.4	71.8	70.8	71.2	70.2	70.5	64.9
73	S. benthica KT99	47.1	42.6	46.2	48.4	59	59.3	61.9	64.1	61.8	60.1	63.7	65.6	65.6	65.9	61.6	61.3	62.3	60.9	60.9	70.5	65.2	70.8	70.8	70.8	70.8	70.8	70.8	70.8	70.8	70.8	70.8	70.8	70.8	71.2	70.5	70.8	71	70.8	70.5	70.5	70.5	71.2	70.2	69.6	71.2	69.9	70.5	67
74	S. benthica DB21MT-2	45.6	43.7	45.9	49.1	60.8	61.1	62.2	65	62.4	61.6	64.3	66.3	66.3	66.6	62.2	61.9	63.3	61.5	61.5	69.2	66.6	71.5	71.5	71.5	71.5	71.5	71.5	71.5	71.5	71.5	71.5	71.5	71.5	71.8	71.2	71.5	70.8	71.5	71.2	71.2	71.2	71.8	70.8	70.2	71.8	70.8	71.5	67.5
75	S. japonica KCTC 12235 (b)	44.3	42.8	46.9	48.7	62.3	62.3	61.6	65	64	62.2	64.9	65.6	65.6	65.9	62.2	62.8	63.9	60.6	60.6	68.6	66.6	71.2	71.2	71.2	71.2	71.2	71.2	71.2	71.2	71.2	71.2	71.2	71.2	71.5	70.8	71.2	70.4	71.2	71.2	71.2	71.2	71.8	71.2	70.2	70.8	71.8	72.4	65.5
76	S. sp. WXL01	42.4	42.4	44.5	46	59.1	59.3	57.9	60.8	59.1	59.1	62.6	60.8	61.1	60.5	60.5	60.2	61.4	59.6	59.3	64.7	66	66.5	66.5	66.5	66.5	66.5	66.5	66.5	66.5	66.5	66.5	66.5	66.5	66.8	66.2	66.5	65.3	66.5	66.5	66.5	66.8	67.1	66.2	65.6	67.1	65.3	65.6	65.5
77	S. sp. SR44-3 (b)	45.6	43.1	45.6	47.5	60.2	60.8	60	63.8	61.8	60.7	63	63.8	64.4	64.4	60.3	60.6	63.6	59.9	59.9	69.2	66.3	72.1	72.1	72.1	72.1	72.1	72.1	72.1	72.1	72.1	72.1	72.1	72.1	72.4	71.8	72.1	71.4	72.1	72.1	72.1	72.4	73	71.8	70.8	72.1	71.5	72.1	67
78	S. fidelis ATCC BAA-318	43.3	45.5	46.1	47.7	62	62.3	61.6	60.7	62.2	61.6	63.5	64.1	62.8	64.7	61.9	61.6	64.2	59.9	59.6	68.1	68	70.3	70.3	70.3	70.3	70.3	70.3	70.3	70.3	70.3	70.3	70.3	70.3	70.6	71.2	70	69.3	70.3	70.3	70	70.9	70.9	70.9	70.3	70.6	68.7	69	67.3
79	S. marina JCM 15074	44	44.3	47.1	49.8	60.2	60.8	60.4	61	63.5	61.9	64.4	64.1	62.8	65	61.6	60.7	63.6	59.6	59.3	66.6	66.6	69.7	69.7	69.7	69.7	69.7	69.7	69.7	69.7	69.7	69.7	69.7	69.7	70	70.6	70	68.4	69.7	69.7	69.3	69.7	70	70	69.3	70.3	69.3	69.3	64.9
80	S. psychrophila WP2	45.3	46.9	46.5	48.4	59.9	60.5	60	60.1	63	60.7	61.8	64.1	63.1	65	61.6	60.9	63.6	59.3	58.7	68.2	67.1	71.8	71.8	71.8	71.8	71.8	71.8	71.8	71.8	71.8	71.8	71.8	71.8	71.8	72.7	71.5	70.8	71.8	71.8	71.5	71.8	72.1	71.8	71.2	71.5	70.8	71.5	66.4
81	S. sonnei C202	47.4	46.8	47.7	48.3	63.1	63.1	61.8	64	64.3	62.2	63.4	65.2	64.9	63.7	63.4	62.8	64.3	59.6	59.6	61.8	61.6	59.1	59.1	59.1	59.1	59.1	59.1	59.1	59.1	59.1	59.1	59.1	59.1	59.1	59.1	59.1	57.8	59.1	59.1	58.5	59.7	59.7	58.5	58.2	58.8	60	60	59.6
82	IntI2	47.4	46.8	47.7	48.3	63.1	63.1	61.8	64	64.3	62.2	63.4	65.2	64.9	63.7	63.4	62.8	64.3	59.6	59.6	61.8	61.6	59.1	59.1	59.1	59.1	59.1	59.1	59.1	59.1	59.1	59.1	59.1	59.1	59.1	59.1	59.1	57.8	59.1	59.1	58.5	59.7	59.7	58.5	58.2	58.8	60	60	59.6
83	E. coli DH5a	32.6	31.4	33.2	34.7	36.1	36.4	35.6	34.7	36	35.4	35.4	37.2	37.2	37.5	37.2	37.5	35.5	32.4	32.7	34.9	34	31.3	31.3	31.3	31.3	31.3	31.3	31.3	31.3	31.3	31.3	31.3	31.3	31.3	31.3	31.3	32.2	31.3	31.3	30.7	31.7	31.7	31	32	30.7	32.9	32.9	32.2
84	S. sp. SHSM-M6	48.8	46.9	48.5	50	63.3	63.3	64.5	65.4	63.9	62.5	62.7	63.9	64.2	65.1	61.4	61.7	62.3	64.5	63.6	59.6	58	60.5	60.5	60.5	60.5	60.5	60.5	60.5	60.5	60.5	60.5	60.5	60.5	60.5	60.5	60.5	59.3	60.5	60.5	60.2	59.9	60.2	59.9	60.2	59.9	61.1	61.1	59.1
85	S. sp. OPT22 (b)	40.6	40.8	40.9	40.7	46.3	46.3	45.9	49.5	48.1	49.4	48.1	50	48.8	50.9	45.3	45.9	49.4	48.3	48.3	55.4	44.2	48.3	48.3	48.3	48.3	48.3	48.3	48.3	48.3	48.3	48.3	48.3	48.3	48.3	48.3	48.3	47.5	48.3	48.3	48	48.6	48.3	48.3	48.3	47.3	48.3	48.6	45.9
86	SamIntIA	47.2	44.7	48.1	49.1	62.7	63	61.3	65	66.5	64.6	66.5	66.3	65.9	67.8	65.6	64.4	65.4	61.8	61.5	63.5	62.2	64.6	64.6	64.6	64.6	64.6	64.6	64.6	64.6	64.6	64.6	64.6	64.6	64.6	64.3	64.3	63.2	64.6	64.6	64.3	64.3	64.3	64.3	64.6	63	63.6	63.9	62.6
87	S. sedimentimangrovi FJAT-52962 (a)	48.9	46.4	49.2	48.9	63	63.3	59.1	62.8	65.8	64.9	65.2	65.9	64.7	65.6	63.8	63.1	63.6	62.4	62.1	61.8	60.8	61.1	61.1	61.1	61.1	61.1	61.1	61.1	61.1	61.1	61.1	61.1	61.1	60.8	61.1	60.8	59.6	61.1	61.1	60.8	60.8	61.1	60.8	61.1	59.6	60.5	60.8	59.1
88	S. corallii A687	46.7	45.5	46.4	46.7	60.2	60.5	58.8	61.9	64.9	63.4	64.9	65.6	65	67.2	63.4	62.2	63.9	63.3	63.3	61.8	61.3	61.4	61.4	61.4	61.4	61.4	61.4	61.4	61.4	61.4	61.4	61.4	61.4	61.4	61.4	61.1	59.9	61.4	61.4	61.1	61.8	61.8	61.4	61.4	60.5	61.1	61.4	58.2
89	S. sedimentimangrovi FJAT-52962 (b)	38.6	43.1	43.6	44.7	54.3	54.6	52.2	57.3	58.1	57.6	57.1	58.4	57.8	57.2	57.5	54.7	56.8	54.4	54.4	54.1	49.7	52.7	52.7	52.7	52.7	52.7	52.7	52.7	52.7	52.7	52.7	52.7	52.7	52.7	52.7	52.7	52.2	51.7	52.7	52	52	52.4	52	52.4	51.7	52.7	52	50.6
90	S. khirikhana TH2012	41.3	43.1	44.3	46	53.4	53.4	51.6	56.3	56.5	56.4	56.8	57.5	57.5	55.6	56.9	54.7	54.6	52.9	52.9	54.3	49.4	51.1	51.1	51.1	51.1	51.1	51.1	51.1	51.1	51.1	51.1	51.1	51.1	51.1	51.1	51.1	50.3	51.1	51.1	50.5	50.5	50.8	50.5	50.8	50.2	51.1	51.7	49.1
91	S. sp. GutCb	44.8	48.3	48	48.3	62.3	62.7	60.9	63.5	68.9	65.9	65.8	66.3	65.9	67.2	65.9	65.6	64.5	62.1	61.8	58.9	58.3	62.7	62.7	62.7	62.7	62.7	62.7	62.7	62.7	62.7	62.7	62.7	62.7	62.7	62.7	62.7	60.8	62.7	62.7	62.1	63	63	62.7	63	63.3	62.7	63	60.2
92	S. sp. KX20019	46.1	47.6	47.6	48	61.4	61.7	60	62.5	67.4	64.3	64.6	65.3	64.7	66.3	64.4	64.4	64.8	62.1	61.8	59.2	58.6	62.1	62.1	62.1	62.1	62.1	62.1	62.1	62.1	62.1	62.1	62.1	62.1	62.1	62.1	62.1	60.2	62.1	62.1	61.4	62.4	62.4	62.1	62.4	62.7	61.8	62.1	59.4
93	S. sp. YLB-08	40.6	42.5	43.3	41.3	48.8	48.8	51.6	52.9	55	50.6	52.2	52.8	52.5	53.8	51.9	51.9	50.9	52.9	52.3	58.1	46.1	52.4	52.4	52.4	52.4	52.4	52.4	52.4	52.4	52.4	52.4	52.4	52.4	52.4	52.4	52	51.3	52.4	52.4	52	52.4	52	51.7	52	51.7	50.5	51.1	48
94	S. sp. YLB-06	46.4	47.3	48.3	48.3	60.2	60.5	59.4	62.2	68	64	64.3	64.4	64.7	65.9	65	65	64.8	62.7	61.8	60.5	59.7	62.4	62.4	62.4	62.4	62.4	62.4	62.4	62.4	62.4	62.4	62.4	62.4	62.7	62.4	62.4	60.5	62.4	62.4	62.1	62.4	62.7	62.1	62.4	62.4	62.1	62.1	59.1
95	S. atlantica HAW-EB5	45.8	47	46.7	47.6	60.8	61.1	60.9	61.3	68.6	64	64	64.7	64.4	66.6	63.1	62.5	62	61.2	61.2	58.3	57.7	62.1	62.1	62.1	62.1	62.1	62.1	62.1	62.1	62.1	62.1	62.1	62.1	62.1	61.4	62.1	60.2	62.1	62.1	61.4	62.4	62.1	61.8	62.4	61.8	62.7	62.7	57.9
96	S. woodyi ATCC 51908 (a)	47.3	46.7	46.4	48.6	58.6	59	59.1	62.2	67.7	64.3	64.6	62.8	62.2	65.6	62.8	63.1	64.2	61.8	61.2	58.9	58.6	61.8	61.8	61.8	61.8	61.8	61.8	61.8	61.8	61.8	61.8	61.8	61.8	61.8	61.8	61.8	60.2	61.8	61.8	61.1	61.4	61.8	61.4	61.8	61.8	61.4	61.4	56.4
97	S. waksmanii ATCC BAA-643	45.1	48	48.9	47.6	61.4	61.7	62.2	63.2	68.3	64.9	65.2	65	65	67.5	64.7	63.8	64.8	63	62.7	63	62.4	64.3	64.3	64.3	64.3	64.3	64.3	64.3	64.3	64.3	64.3	64.3	64.3	64.3	64.3	64.3	62.4	64.3	64.3	63.9	64.6	64.6	64.3	64.6	63.9	62.4	62.7	59.9
98	S. sp. Scap07	46.7	47.6	48.9	48.9	61.1	61.4	62.2	63.5	69.3	65.5	65.5	65.9	65.9	67.8	65	64.1	65.1	63	62.7	63	61.9	64.3	64.3	64.3	64.3	64.3	64.3	64.3	64.3	64.3	64.3	64.3	64.3	64.3	64.3	64.3	62.4	64.3	64.3	63.6	64.6	64.6	64.3	64.6	64.3	63.3	63.6	60.2
99	SamIntIB	42.4	43.8	43.8	46.4	55.2	54.9	55.6	57.3	59.3	55.5	58.1	58.8	57.5	59.7	56.6	56.3	54	52.3	52	53	50.6	54.5	54.5	54.5	54.5	54.5	54.5	54.5	54.5	54.5	54.5	54.5	54.5	54.2	54.2	54.5	55.1	54.5	54.5	54.2	55.2	55.2	54.5	54.9	53.9	54.9	54.9	52.9
100	S. sp. LC6 (a)	46.1	47.6	47.6	46.7	62	62	61.6	64.1	64.6	61	63	65	63.4	65	63.1	62.2	61.7	63.9	63.9	59.2	58.8	63.6	63.6	63.6	63.6	63.6	63.6	63.6	63.6	63.6	63.6	63.6	63.6	63.3	63.3	63.6	61.8	63.6	63.6	63.3	63.6	63.6	63	63.3	62.7	61.8	62.1	59.4
101	S. xiamenensis Sh95 (b)	46.1	47.6	47.6	46.7	62	62	61.6	64.1	64.6	61	63	65	63.4	65	63.1	62.2	61.7	63.9	63.9	59.2	58.8	63.6	63.6	63.6	63.6	63.6	63.6	63.6	63.6	63.6	63.6	63.6	63.6	63.3	63.3	63.6	61.8	63.6	63.6	63.3	63.6	63.6	63	63.3	62.7	61.8	62.1	59.4
102	S. sp. FDAARGOS_354 (a)	46.1	47.6	47.6	46.7	62	62	61.6	64.1	64.6	61	63	65	63.4	65	63.1	62.2	61.7	63.9	63.9	59.2	58.8	63.6	63.6	63.6	63.6	63.6	63.6	63.6	63.6	63.6	63.6	63.6	63.6	63.3	63.3	63.6	61.8	63.6	63.6	63.3	63.6	63.6	63	63.3	62.7	61.8	62.1	59.4
103	S. putrefaciens NCTC12093	46.1	47.6	47.6	46.7	62	62	61.6	64.1	64.6	61	63	65	63.4	65	63.1	62.2	61.7	63.9	63.9	59.2	58.8	63.6	63.6	63.6	63.6	63.6	63.6	63.6	63.6	63.6	63.6	63.6	63.6	63.3	63.3	63.6	61.8	63.6	63.6	63.3	63.6	63.6	63	63.3	62.7	61.8	62.1	59.4
104	S. xiamenensis AS58	46.1	47.6	47.6	46.7	62	62	61.6	64.1	64.6	61	63	65	63.4	65	63.1	62.2	61.7	63.9	63.9	59.2	58.8	63.6	63.6	63.6	63.6	63.6	63.6	63.6	63.6	63.6	63.6	63.6	63.6	63.3	63.3	63.6	61.8	63.6	63.6	63.3	63.6	63.6	63	63.3	62.7	61.8	62.1	59.4
105	S. sp. FDAARGOS_354 (b)	46.1	47.6	47.6	46.7	62	62	61.6	64.1	64.6	61	63	65	63.4	65	63.1	62.2	61.7	63.9	63.9	59.2	58.8	63.6	63.6	63.6	63.6	63.6	63.6	63.6	63.6	63.6	63.6	63.6	63.6	63.3	63.3	63.6	61.8	63.6	63.6	63.3	63.6	63.6	63	63.3	62.7	61.8	62.1	59.4
106	S. decolorationis Ni1-3	46.1	47.6	47.6	46.7	62	62	61.6	64.1	64.6	61	63	65	63.4	65	63.1	62.2	61.7	63.9	63.9	59.2	58.8	63.6	63.6	63.6	63.6	63.6	63.6	63.6	63.6	63.6	63.6	63.6	63.6	63.3	63.3	63.6	61.8	63.6	63.6	63.3	63.6	63.6	63	63.3	62.7	61.8	62.1	59.4
107	S. xiamenensis T17 (b)	46.1	47.6	47.6	46.7	62	62	61.6	64.1	64.6	61	63	65	63.4	65	63.1	62.2	61.7	63.9	63.9	59.2	58.8	63.6	63.6	63.6	63.6	63.6	63.6	63.6	63.6	63.6	63.6	63.6	63.6	63.3	63.3	63.6	61.8	63.6	63.6	63.3	63.6	63.6	63	63.3	62.7	61.8	62.1	59.4
108	S. sp. LC2 (a)	46.1	47.6	47.6	46.7	62	62	61.6	64.1	64.6	61	63	65	63.4	65	63.1	62.2	61.7	63.9	63.9	59.2	58.8	63.6	63.6	63.6	63.6	63.6	63.6	63.6	63.6	63.6	63.6	63.6	63.6	63.3	63.3	63.6	61.8	63.6	63.6	63.3	63.6	63.6	63	63.3	62.7	61.8	62.1	59.4
109	S. xiamenensis T17 (c)	46.1	47.6	47.6	46.7	62	62	61.6	64.1	64.6	61	63	65	63.4	65	63.1	62.2	61.7	63.9	63.9	59.2	58.8	63.6	63.6	63.6	63.6	63.6	63.6	63.6	63.6	63.6	63.6	63.6	63.6	63.3	63.3	63.6	61.8	63.6	63.6	63.3	63.6	63.6	63	63.3	62.7	61.8	62.1	59.4
110	S. putrefaciens 200 (a)	44.5	47.6	48.3	46.7	62.3	62.3	61.9	64.4	65.2	61.6	63.4	65	63.4	65.3	63.4	62.5	62	63.9	63.9	60.2	59.7	63.9	63.9	63.9	63.9	63.9	63.9	63.9	63.9	63.9	63.9	63.9	63.9	63.6	63.6	63.9	62.1	63.9	63.9	63.6	63.9	63.9	63.3	63.6	62.7	62.1	62.4	59.6
111	S. putrefaciens NCTC10695	43.9	47.3	48.6	47	62.3	62.3	61.9	63.8	64.9	61.3	63	65.3	63.8	65.3	63.1	62.2	61.7	63.9	63.6	59.9	59.4	64.3	64.3	64.3	64.3	64.3	64.3	64.3	64.3	64.3	64.3	64.3	64.3	63.9	63.9	64.3	62.4	64.3	64.3	63.9	64.3	64.3	63.6	63.9	63	62.4	62.7	59.6
112	S. oneidensis MR-1	43.9	48.3	47.3	46.4	61.7	61.7	61.3	63.2	64.3	61.6	62.7	65.3	63.8	65	63.4	62.5	61.4	63.3	63.3	59.6	59.1	63.6	63.6	63.6	63.6	63.6	63.6	63.6	63.6	63.6	63.6	63.6	63.6	63.3	63.6	63.6	61.8	63.6	63.6	63.3	63.6	63.6	63	63.3	62.4	61.8	62.1	59.6
113	S. sp. MR-7	47	48.6	48.6	49.8	62	62	61.3	63.8	64.6	61.6	63	64.7	63.1	64.7	63.1	62.8	61.1	62.7	62.7	58.3	58	63	63	63	63	63	63	63	63	63	63	63	63	62.7	63	63	61.1	63	63	62.7	63	63	62.4	62.7	62.1	61.1	61.1	58.8
114	S. sp. BC20	46.7	48.6	48.6	48.3	62.3	62.3	61.6	63.8	64.9	61.9	63.4	65	63.4	65	63.4	63.1	61.4	63.6	63.6	58.9	58.8	63.3	63.3	63.3	63.3	63.3	63.3	63.3	63.3	63.3	63.3	63.3	63.3	63	63.3	63.3	61.4	63.3	63.3	63	63.3	63.3	62.7	63	62.4	61.4	61.4	59.1
115	S. xiamenensis T17 (a)	46.1	48	47.3	46.4	62	62	61.6	64.4	64.9	61.3	63.4	65.3	63.8	65.3	63.4	62.5	61.7	63.6	63.3	59.2	58.8	63.6	63.6	63.6	63.6	63.6	63.6	63.6	63.6	63.6	63.6	63.6	63.6	63.3	63.3	63.6	61.8	63.6	63.6	63.3	63.6	63.6	63	63.3	62.7	61.8	62.1	59.4
116	S. putrefaciens 200 (b)	46.1	48	47.3	46.4	62	62	61.6	64.4	64.9	61.3	63.4	65.3	63.8	65.3	63.4	62.5	61.7	63.6	63.3	59.2	58.8	63.6	63.6	63.6	63.6	63.6	63.6	63.6	63.6	63.6	63.6	63.6	63.6	63.3	63.3	63.6	61.8	63.6	63.6	63.3	63.6	63.6	63	63.3	62.7	61.8	62.1	59.4
117	S. mangrovi YQH10	45.1	47.6	46.1	46.1	61.7	61.7	62.2	62.2	63.7	61.3	62.1	65.3	63.8	65.6	63.4	62.8	60.5	64.2	63.9	59.2	59.1	63	63	63	63	63	63	63	63	63	63	63	63	62.7	63	63	61.1	63	63	62.7	63	63	62.1	62.7	62.1	61.4	61.8	59.1
118	S. colwelliana ATCC 39565	46.7	46.4	46.4	46.1	60.8	60.5	60.9	61.9	63.7	60.4	61.8	64.7	63.1	64.7	62.2	61.3	60.5	61.8	62.4	58	57.7	61.4	61.4	61.4	61.4	61.4	61.4	61.4	61.4	61.4	61.4	61.4	61.4	61.1	61.4	61.4	59.6	61.4	61.4	61.1	61.4	61.4	60.8	61.1	60.8	59.9	60.2	58.8
119	S. insulae JBTF-M181	47	46.4	47	46.4	61.1	60.8	61.9	62.2	64	60.7	62.1	65.3	63.8	65.3	62.8	61.9	60.8	62.4	63	58.6	58.3	62.1	62.1	62.1	62.1	62.1	62.1	62.1	62.1	62.1	62.1	62.1	62.1	61.8	62.1	62.1	60.2	62.1	62.1	61.8	62.1	62.1	61.4	61.8	61.4	60.5	60.8	59.4
120	S. sp. HN-41	49	46.1	47.4	48	56.5	57.1	56.9	58.5	58.4	57.6	55.9	61.6	60.3	62.5	58.4	57.8	54.6	60.9	60.6	61.3	53.3	57.7	57.7	57.7	57.7	57.7	57.7	57.7	57.7	57.7	57.7	57.7	57.7	57.4	57.7	58	56.7	57.7	57.7	57.4	57.7	57.7	56.7	57.7	57.1	56.4	56.7	55.6
121	S. baltica OS185 (b)	47.6	48.3	47.3	48.9	62	61.7	62.5	65	64	61.9	62.7	66.3	64.7	66.6	65.3	63.4	63	64.2	63.3	59.6	59.1	62.1	62.1	62.1	62.1	62.1	62.1	62.1	62.1	62.1	62.1	62.1	62.1	61.8	62.1	62.1	60.5	62.1	62.1	61.8	62.1	62.1	61.4	61.8	61.8	61.8	62.1	59.4
122	S. baltica M1	46.7	48	47	48.9	62	61.7	62.2	64.7	63.7	61.9	62.7	66.3	64.7	66.6	65	63.1	62.7	63.9	63	59.6	59.1	62.1	62.1	62.1	62.1	62.1	62.1	62.1	62.1	62.1	62.1	62.1	62.1	61.8	62.1	62.1	60.5	62.1	62.1	61.8	62.1	62.1	61.4	61.8	61.8	61.4	61.8	59.4
123	S. baltica NCTC10735	47.3	48	47.6	49.8	62	61.7	61.9	64.7	63.4	61.6	62.4	65.9	64.7	66.6	64.7	62.8	62.7	63.9	63	59.6	59.1	61.8	61.8	61.8	61.8	61.8	61.8	61.8	61.8	61.8	61.8	61.8	61.8	61.4	61.8	61.8	60.8	61.8	61.8	61.4	61.8	61.8	61.1	61.4	61.4	61.8	62.1	59.1
124	S. sp. ISTPL2	47.6	48	48	49.8	61.7	61.4	61.9	64.4	63	61.6	62.1	65.6	64.4	66.6	64.7	62.8	62.3	63.9	63	59.6	59.1	61.4	61.4	61.4	61.4	61.4	61.4	61.4	61.4	61.4	61.4	61.4	61.4	61.1	61.4	61.4	60.5	61.4	61.4	61.1	61.4	61.4	60.8	61.1	61.1	61.4	61.8	59.1
125	S. baltica OS195 (b)	46.4	47.6	46.7	48.6	61.4	61.1	61.9	64.1	63.4	61.6	62.4	65.9	64.4	66.3	64.7	62.8	62	63.6	62.7	59.6	59.1	60.8	60.8	60.8	60.8	60.8	60.8	60.8	60.8	60.8	60.8	60.8	60.8	60.5	60.8	60.8	59.2	60.8	60.8	60.5	60.8	60.8	60.2	60.5	60.5	61.1	61.4	59.1
126	S. baltica OS678	46.4	47.6	46.7	48.6	61.4	61.1	61.9	64.1	63.4	61.6	62.4	65.9	64.4	66.3	64.7	62.8	62	63.6	62.7	59.6	59.1	60.8	60.8	60.8	60.8	60.8	60.8	60.8	60.8	60.8	60.8	60.8	60.8	60.5	60.8	60.8	59.2	60.8	60.8	60.5	60.8	60.8	60.2	60.5	60.5	61.1	61.4	59.1
127	S. baltica OS625	46.4	47.6	46.7	48.6	61.4	61.1	61.9	64.1	63.4	61.6	62.4	65.9	64.4	66.3	64.7	62.8	62	63.6	62.7	59.6	59.1	60.8	60.8	60.8	60.8	60.8	60.8	60.8	60.8	60.8	60.8	60.8	60.8	60.5	60.8	60.8	59.2	60.8	60.8	60.5	60.8	60.8	60.2	60.5	60.5	61.1	61.4	59.1
128	S. putrefaciens CIP69.34	47.3	47.9	47.6	49.8	61.4	61.7	61.3	64.1	63.4	63.4	62.4	65	63.8	65.6	64.1	62.2	62	62.7	63	58.7	58	61.1	61.1	61.1	61.1	61.1	61.1	61.1	61.1	61.1	61.1	61.1	61.1	60.8	61.1	61.1	60.9	61.1	61.1	60.8	61.1	61.1	60.5	60.8	60.8	60.2	60.5	58.2
129	S. baltica OS185 (a)	47	48.3	47.3	48	62	62.3	62.5	65	64.3	64.3	63.4	66.3	64.7	66.6	65	63.1	62.7	62.4	62.7	58.9	58.8	62.4	62.4	62.4	62.4	62.4	62.4	62.4	62.4	62.4	62.4	62.4	62.4	62.1	62.4	62.4	60.8	62.4	62.4	62.1	62.4	62.4	61.8	62.1	62.1	61.4	61.8	59.1
130	S. putrefaciens HRCR-6	46.7	48	47	48.9	62	61.7	62.2	64.7	63.7	61.9	62.7	66.3	64.7	66.6	65	63.1	62.7	63.6	62.7	59.6	59.1	62.1	62.1	62.1	62.1	62.1	62.1	62.1	62.1	62.1	62.1	62.1	62.1	61.8	62.1	62.1	60.5	62.1	62.1	61.8	62.1	62.1	61.4	61.8	61.8	61.8	62.1	59.4
131	S. sp. WE21	48	48	48	49.2	62.3	62	62.2	65	63.7	61.9	63	66.3	64.7	66.6	65	63.1	62.7	63.6	62.7	59.6	59.1	62.1	62.1	62.1	62.1	62.1	62.1	62.1	62.1	62.1	62.1	62.1	62.1	61.8	62.1	62.1	60.5	62.1	62.1	61.8	62.1	62.1	61.4	61.8	61.8	61.8	62.1	59.4
132	S. canadensis HAW-EB2	46.1	46.1	49.5	48	61.4	61.1	61.6	64.4	65.2	63.4	64.3	65.3	63.8	65	63.1	63.1	63.9	62.1	63	58.9	58.3	62.1	62.1	62.1	62.1	62.1	62.1	62.1	62.1	62.1	62.1	62.1	62.1	62.1	62.1	62.1	60.2	62.1	62.1	61.8	62.1	62.7	62.1	62.4	63.3	63	63	59.4
133	S. benthica DSM 8812	45	46.5	48.4	48.4	60.2	59.9	62.5	65.3	64.3	61.6	63.4	65.6	64.4	65.9	65	65	65.7	63	63	60.4	59.4	63	63	63	63	63	63	63	63	63	63	63	63	63.3	63	63	61.3	63	63	62.7	63	63.3	62.7	63.3	63.6	64.3	64.3	59.9
134	S. halifaxensis HAW-EB4	44.4	47.5	47.5	48.4	59.9	59.6	63.1	64.1	67.7	63.1	64.9	66.3	65.3	65.9	64.4	64.1	64.8	62.1	61.5	59.4	58.8	60.3	60.3	60.3	60.3	60.3	60.3	60.3	60.3	60.3	60.3	60.3	60.3	60.3	60	60.3	58.4	60.3	60.3	60	60.6	60.6	60	60.6	61.3	62.5	62.5	59.4
135	S. schlegeliana JCM 11561	44.7	47.5	47.8	48.8	61.7	61.4	60.9	63.5	68	64.6	65.5	66.3	65.6	65.9	64.1	64.1	63.9	61.2	60.2	59.4	58.8	60.9	60.9	60.9	60.9	60.9	60.9	60.9	60.9	60.9	60.9	60.9	60.9	60.9	60.6	60.9	59.1	60.9	60.9	60.6	61.3	61.3	60.9	61.3	61.9	62.8	62.8	59.9
136	S. sp. SR44-3 (c)	46.4	46.1	47.6	48.3	62.3	62	62.8	63.2	64.6	61.3	63	65	63.4	64.1	61.9	62.5	62.3	62.1	61.8	58.9	58.3	62.4	62.4	62.4	62.4	62.4	62.4	62.4	62.4	62.4	62.4	62.4	62.4	62.4	62.4	62.4	60.5	62.4	62.4	62.1	62.4	62.7	62.7	62.7	63.6	64.3	64.6	59.6
137	S. donghaensis LT17 (b)	38.9	41.5	41.9	45.7	49.7	49.7	48.8	50.5	49.4	47.6	49.1	50.6	50.3	50.9	50.6	48.8	50	52	51.4	56.4	45	48.6	48.6	48.6	48.6	48.6	48.6	48.6	48.6	48.6	48.6	48.6	48.6	48.6	48.6	48.6	47.8	48.6	48.6	48.3	48.6	48.6	50.2	50.2	48.9	50.8	50.8	47.1
138	S. cyperi FJAT-53726	43.8	45	46.9	48.8	61.1	60.8	61.6	63.2	64.6	62.5	62.4	65.3	64.4	65.3	61.9	61.3	64.5	61.2	61.2	59.7	58.8	61.6	61.6	61.6	61.6	61.6	61.6	61.6	61.6	61.6	61.6	61.6	61.6	61.3	61.6	61.6	60.3	61.6	61.6	61.3	61.9	61.9	60.9	61.6	61.6	61.3	61.9	58.5
139	S. algae CCUG-50501	46.3	46.6	47.8	48.4	61.4	62.3	62.2	64.4	65.5	64	65.5	66.9	65.3	66.3	63.1	62.8	64.8	63.6	63.3	60.3	59.7	60.9	60.9	60.9	60.9	60.9	60.9	60.9	60.9	60.9	60.9	60.9	60.9	60.6	60.6	60.9	59.4	60.9	60.9	60.6	61.3	61.3	60.6	60.9	60.9	61.6	61.9	59.9
140	S. algae SA2	45.6	46.6	47.8	48.4	61.4	62.3	62.2	64.4	65.5	64	65.5	66.9	65.3	66.6	63.1	62.8	64.8	63.6	63.3	60.3	59.7	60.9	60.9	60.9	60.9	60.9	60.9	60.9	60.9	60.9	60.9	60.9	60.9	60.6	60.6	60.9	59.4	60.9	60.9	60.6	61.3	61.3	60.6	60.9	60.9	61.6	61.9	59.9
141	S. algae CCUG-526	45.6	46.6	47.8	48.4	61.4	62.3	62.2	64.4	65.5	64	65.5	66.9	65.3	66.6	63.1	62.8	64.8	63.6	63.3	60.3	59.7	60.9	60.9	60.9	60.9	60.9	60.9	60.9	60.9	60.9	60.9	60.9	60.9	60.6	60.6	60.9	59.4	60.9	60.9	60.6	61.3	61.3	60.6	60.9	60.9	61.6	61.9	59.9
142	S. algae 590722	45.6	46.6	47.8	48.4	61.4	62.3	62.2	64.4	65.5	64	65.5	66.9	65.3	66.6	63.1	62.8	64.8	63.6	63.3	60.3	59.7	60.9	60.9	60.9	60.9	60.9	60.9	60.9	60.9	60.9	60.9	60.9	60.9	60.6	60.6	60.9	59.4	60.9	60.9	60.6	61.3	61.3	60.6	60.9	60.9	61.6	61.9	59.9
143	S. algae A58	45.6	46.6	47.8	48.4	61.4	62.3	62.2	64.4	65.5	64	65.5	66.9	65.3	66.6	63.1	62.8	64.8	63.6	63.3	60.3	59.7	60.9	60.9	60.9	60.9	60.9	60.9	60.9	60.9	60.9	60.9	60.9	60.9	60.6	60.6	60.9	59.4	60.9	60.9	60.6	61.3	61.3	60.6	60.9	60.9	61.6	61.9	59.9
144	S. algae 150735	45.6	46.6	47.8	48.4	61.4	62.3	62.2	64.4	65.5	64	65.5	66.9	65.3	66.6	63.1	62.8	64.8	63.6	63.3	60.3	59.7	60.9	60.9	60.9	60.9	60.9	60.9	60.9	60.9	60.9	60.9	60.9	60.9	60.6	60.6	60.9	59.4	60.9	60.9	60.6	61.3	61.3	60.6	60.9	60.9	61.6	61.9	59.9
145	S. algae CCUG-38646	45.6	46.6	47.8	48.4	61.4	62.3	62.2	64.4	65.5	64	65.5	66.9	65.3	66.6	63.1	62.8	64.8	63.6	63.3	60.3	59.7	60.9	60.9	60.9	60.9	60.9	60.9	60.9	60.9	60.9	60.9	60.9	60.9	60.6	60.6	60.9	59.4	60.9	60.9	60.6	61.3	61.3	60.6	60.9	60.9	61.6	61.9	59.9
146	S. algae A292	45.6	46.6	47.8	48.4	61.4	62.3	62.2	64.4	65.5	64	65.5	66.9	65.3	66.6	63.1	62.8	64.8	63.6	63.3	60.3	59.7	60.9	60.9	60.9	60.9	60.9	60.9	60.9	60.9	60.9	60.9	60.9	60.9	60.6	60.6	60.9	59.4	60.9	60.9	60.6	61.3	61.3	60.6	60.9	60.9	61.6	61.9	59.9
147	S. chilikensis JC5	45.6	46.6	47.8	48.4	61.4	62.3	62.2	64.4	65.5	64	65.5	66.9	65.3	66.6	63.1	62.8	64.8	63.6	63.3	60.3	59.7	60.9	60.9	60.9	60.9	60.9	60.9	60.9	60.9	60.9	60.9	60.9	60.9	60.6	60.6	60.9	59.4	60.9	60.9	60.6	61.3	61.3	60.6	60.9	60.9	61.6	61.9	59.9
148	S. algae SF7	45.6	46.6	47.8	48.4	61.4	62.3	62.2	64.4	65.5	64	65.5	66.9	65.3	66.6	63.1	62.8	64.8	63.6	63.3	60.3	59.7	60.9	60.9	60.9	60.9	60.9	60.9	60.9	60.9	60.9	60.9	60.9	60.9	60.6	60.6	60.9	59.4	60.9	60.9	60.6	61.3	61.3	60.6	60.9	60.9	61.6	61.9	59.9
149	S. algae CCUG-15259	45.6	46.6	47.8	48.4	61.4	62.3	62.2	64.4	65.5	64	65.5	66.9	65.3	66.6	63.1	62.8	64.8	63.6	63.3	60.3	59.7	60.9	60.9	60.9	60.9	60.9	60.9	60.9	60.9	60.9	60.9	60.9	60.9	60.6	60.6	60.9	59.4	60.9	60.9	60.6	61.3	61.3	60.6	60.9	60.9	61.6	61.9	59.9
150	S. algae CLS3	45.9	46.6	47.8	48.1	61.4	62.3	63.4	65.3	66.5	64	65.5	66.9	65.3	66.6	63.1	63.1	64.8	63.3	63	60.3	59.7	60.9	60.9	60.9	60.9	60.9	60.9	60.9	60.9	60.9	60.9	60.9	60.9	60.6	60.6	60.9	59.4	60.9	60.9	60.6	61.3	61.3	60.6	60.9	60.9	61.6	61.9	59.6
151	S. algae CSB04KR	45.6	46.6	47.8	48.4	61.4	62.3	62.2	64.4	65.5	64	65.5	66.9	65.3	66.6	63.1	62.8	64.8	63.6	63.3	60.3	59.7	60.9	60.9	60.9	60.9	60.9	60.9	60.9	60.9	60.9	60.9	60.9	60.9	60.6	60.6	60.9	59.4	60.9	60.9	60.6	61.3	61.3	60.6	60.9	60.9	61.6	61.9	59.9
152	S. algae HUD-I2	45.6	46.6	47.8	48.4	61.4	62.3	62.2	64.1	65.2	64	65.5	66.9	65.3	66.6	62.8	62.5	64.8	63.3	63	60	59.4	60.6	60.6	60.6	60.6	60.6	60.6	60.6	60.6	60.6	60.6	60.6	60.6	60.3	60.3	60.6	59.1	60.6	60.6	60.3	60.9	60.9	60.3	60.6	60.6	61.3	61.6	59.6
153	S. algae HUD-H4	45.6	46.6	47.8	48.4	61.4	62.3	62.2	64.1	65.2	64	65.5	66.9	65.3	66.6	62.8	62.5	64.8	63.3	63	60	59.4	60.6	60.6	60.6	60.6	60.6	60.6	60.6	60.6	60.6	60.6	60.6	60.6	60.3	60.3	60.6	59.1	60.6	60.6	60.3	60.9	60.9	60.3	60.6	60.6	61.3	61.6	59.6
154	S. algae CCUG-789	45.6	46.6	47.8	48.4	61.4	62.3	62.2	64.4	65.5	64	65.5	66.9	65.3	66.3	63.1	62.8	64.5	63.3	63	60.3	59.7	60.9	60.9	60.9	60.9	60.9	60.9	60.9	60.9	60.9	60.9	60.9	60.9	60.6	60.6	60.9	59.4	60.9	60.9	60.6	61.3	61.3	60.6	60.9	60.9	61.6	61.9	59.9
155	S. algae G1	45.9	45	47.8	49.1	61.1	62	61.9	64.1	65.2	63.7	65.2	66.6	65	66.6	62.8	62.5	64.5	63	62.7	60	59.4	60.6	60.6	60.6	60.6	60.6	60.6	60.6	60.6	60.6	60.6	60.6	60.6	60.3	60.3	60.6	59.1	60.6	60.6	60.3	60.9	60.9	60.3	60.6	60.6	61.3	61.6	59.6
156	S. algae A56	45.9	45	47.8	49.1	61.1	62	61.9	64.1	65.2	63.7	65.2	66.6	65	66.6	62.8	62.5	64.5	63	62.7	60	59.4	60.6	60.6	60.6	60.6	60.6	60.6	60.6	60.6	60.6	60.6	60.6	60.6	60.3	60.3	60.6	59.1	60.6	60.6	60.3	60.9	60.9	60.3	60.6	60.6	61.3	61.6	59.6
157	S. algae CCUG-20533	45	45.6	47.5	48.4	62.3	62	61.9	64.1	65.2	63.7	65.2	66.3	64.7	65.6	63.4	62.5	64.5	63.3	63	60	59.4	60.3	60.3	60.3	60.3	60.3	60.3	60.3	60.3	60.3	60.3	60.3	60.3	60	60	60.3	58.8	60.3	60.3	60	60.6	60.6	60	60.3	60.3	60.9	61.3	59.4
158	S. algae MARS 14	45.3	46.3	47.5	48.1	61.1	62	61.9	64.1	65.2	63.7	65.2	66.6	65	66.3	62.8	62.5	64.5	63.3	63	60.3	59.4	60.6	60.6	60.6	60.6	60.6	60.6	60.6	60.6	60.6	60.6	60.6	60.6	60.3	60.3	60.6	59.1	60.6	60.6	60.3	60.9	60.9	60.3	60.6	60.6	61.3	61.6	59.6
159	S. algae JCM 14758	45.6	46.6	47.8	48.8	61.4	62.3	62.2	64.4	65.8	64.3	65.8	66.9	65.3	66.6	63.1	62.8	64.8	63.3	63	60.3	59.7	60.9	60.9	60.9	60.9	60.9	60.9	60.9	60.9	60.9	60.9	60.9	60.9	60.6	60.6	60.9	59.4	60.9	60.9	60.6	61.3	61.3	60.6	60.9	60.9	61.6	61.9	59.9
160	S. algae CCUG-12945	45.6	46.6	47.8	48.8	61.4	62.3	62.2	64.4	65.8	64.3	65.8	66.9	65.3	66.6	63.1	62.8	64.8	63.3	63	60.3	59.7	60.9	60.9	60.9	60.9	60.9	60.9	60.9	60.9	60.9	60.9	60.9	60.9	60.6	60.6	60.9	59.4	60.9	60.9	60.6	61.3	61.3	60.6	60.9	60.9	61.6	61.9	59.9
161	S. algae 404	45.6	46.6	47.8	48.8	61.4	62.3	62.2	64.4	65.8	64.3	65.8	66.9	65.3	66.6	63.1	62.8	64.8	63.3	63	60.3	59.7	60.9	60.9	60.9	60.9	60.9	60.9	60.9	60.9	60.9	60.9	60.9	60.9	60.6	60.6	60.9	59.4	60.9	60.9	60.6	61.3	61.3	60.6	60.9	60.9	61.6	61.9	59.9
162	S. algae A59	45.6	46.6	47.8	48.8	61.4	62.3	62.2	64.4	65.8	64.3	65.8	66.9	65.3	66.6	63.1	62.8	64.8	63.3	63	60.3	59.7	60.9	60.9	60.9	60.9	60.9	60.9	60.9	60.9	60.9	60.9	60.9	60.9	60.6	60.6	60.9	59.4	60.9	60.9	60.6	61.3	61.3	60.6	60.9	60.9	61.6	61.9	59.9
163	S. algae MN-01	45.3	46.3	47.5	48.4	61.4	62.3	62.5	64.1	65.5	64	65.5	66.9	65.3	66.6	63.1	62.8	64.8	63	62.7	60	59.4	60.6	60.6	60.6	60.6	60.6	60.6	60.6	60.6	60.6	60.6	60.6	60.6	60.3	60.3	60.6	59.1	60.6	60.6	60.3	60.9	60.9	60.3	60.6	60.6	61.3	61.6	59.6
164	S. algae AC	46.1	46.7	48.3	48.9	62.7	62.3	62.2	64.4	65.5	64.3	65.5	66.9	65.3	66.6	63.1	63.1	64.8	63.3	63	60.5	59.7	61.1	61.1	61.1	61.1	61.1	61.1	61.1	61.1	61.1	61.1	61.1	61.1	60.8	60.8	61.1	59.6	61.1	61.1	60.8	61.4	61.4	60.8	61.1	61.1	61.8	62.1	59.6
165	S. algae SYT3	46.1	46.7	48.3	48.9	62.7	62.3	62.2	64.4	65.5	64.3	65.5	66.9	65.3	66.6	63.1	63.1	64.8	63.3	63	60.5	59.7	61.1	61.1	61.1	61.1	61.1	61.1	61.1	61.1	61.1	61.1	61.1	61.1	60.8	60.8	61.1	59.6	61.1	61.1	60.8	61.4	61.4	60.8	61.1	61.1	61.8	62.1	59.6
166	S. algae melkephyllucas	46.1	46.7	48.3	48.9	62.7	62.3	62.2	64.4	65.5	64.3	65.5	66.9	65.3	66.6	63.1	63.1	64.8	63.3	63	60.5	59.7	61.1	61.1	61.1	61.1	61.1	61.1	61.1	61.1	61.1	61.1	61.1	61.1	60.8	60.8	61.1	59.6	61.1	61.1	60.8	61.4	61.4	60.8	61.1	61.1	61.8	62.1	59.6
167	S. algae CCUG-56496	46.4	47.4	49.7	51	59.6	60.5	59.7	61.9	64.3	62.8	64.3	64.1	62.5	64.1	61.3	60.9	62.3	60.6	60.2	59.5	56.6	58.3	58.3	58.3	58.3	58.3	58.3	58.3	58.3	58.3	58.3	58.3	58.3	58	58	58.3	58.9	58.3	58.3	58	58.6	58.6	58	58.3	58.3	58.9	59.2	57.6
168	S. algae CECT5071	46.6	46.6	47.8	48.4	61.1	62	61.9	64.1	65.2	63.7	65.2	66.6	65	66.6	63.1	62.8	64.8	63.3	63	60	59.4	60.6	60.6	60.6	60.6	60.6	60.6	60.6	60.6	60.6	60.6	60.6	60.6	60.3	60.3	60.6	59.1	60.6	60.6	60.3	60.9	60.9	60.3	60.6	60.6	61.3	61.6	59.6
169	S. algae ATCC 51192	46.6	46.6	47.8	48.4	61.1	62	61.9	64.1	65.2	63.7	65.2	66.6	65	66.6	63.1	62.8	64.8	63.3	63	60	59.4	60.6	60.6	60.6	60.6	60.6	60.6	60.6	60.6	60.6	60.6	60.6	60.6	60.3	60.3	60.6	59.1	60.6	60.6	60.3	60.9	60.9	60.3	60.6	60.6	61.3	61.6	59.6
170	S. algae JCM 21037	48.3	41.2	45.6	46	53.4	54.3	52.5	54.5	55.6	54.9	55.3	56.9	55.6	56.6	54.7	54.1	54.3	56.6	56.3	62.3	49.4	53	53	53	53	53	53	53	53	53	53	53	53	52.7	53	53	52.2	53	53	52.4	53.3	53.3	52.4	52.7	52.7	52.7	53	51.5
171	S. algae 5043	46.6	46.6	47.8	48.4	61.1	62	61.9	64.1	65.2	63.7	65.2	66.6	65	66.6	63.1	62.8	64.8	63.3	63	60	59.4	60.6	60.6	60.6	60.6	60.6	60.6	60.6	60.6	60.6	60.6	60.6	60.6	60.3	60.3	60.6	59.1	60.6	60.6	60.3	60.9	60.9	60.3	60.6	60.6	61.3	61.6	59.6
172	S. algae A97	46.6	46.6	47.8	48.4	61.1	62	61.9	64.1	65.2	63.7	65.2	66.6	65	66.6	63.1	62.8	64.8	63.3	63	60	59.4	60.6	60.6	60.6	60.6	60.6	60.6	60.6	60.6	60.6	60.6	60.6	60.6	60.3	60.3	60.6	59.1	60.6	60.6	60.3	60.9	60.9	60.3	60.6	60.6	61.3	61.6	59.6
173	S. algae SYT2	45.3	46.3	47.5	48.1	61.1	62	61.9	64.1	65.2	63.7	65.2	66.6	65	66.3	62.8	62.5	64.5	63.3	63	60	59.4	60.6	60.6	60.6	60.6	60.6	60.6	60.6	60.6	60.6	60.6	60.6	60.6	60.3	60.3	60.6	59.1	60.6	60.6	60.3	60.9	60.9	60.3	60.6	60.6	61.3	61.6	59.6
174	S. algae A93	46.3	46.6	47.8	48.4	61.4	62.3	62.2	64.4	65.5	64	65.5	66.9	65.3	66.6	63.1	62.8	64.8	63.6	63.3	60.3	59.7	60.9	60.9	60.9	60.9	60.9	60.9	60.9	60.9	60.9	60.9	60.9	60.9	60.6	60.6	60.9	59.4	60.9	60.9	60.6	61.3	61.3	60.6	60.9	60.9	61.6	61.9	59.9
175	S. chilikensis KCTC 22540	47	49	48.7	50.7	59	59.9	59.7	61.6	62.7	61	62.4	64.1	62.8	63.4	60.6	60.3	62	61.5	61.2	63.5	56.6	58.3	58.3	58.3	58.3	58.3	58.3	58.3	58.3	58.3	58.3	58.3	58.3	58	58	58.3	57.6	58.3	58.3	58	58.6	58.6	58	58.3	58.3	58.9	59.2	57
176	S. algae CLS1 (a)	45.6	46.9	47.8	48.8	61.4	62.3	62.2	64.1	65.2	64	65.5	66.9	65.3	66.6	63.1	62.8	64.5	63.6	64.2	60.3	59.7	61.3	61.3	61.3	61.3	61.3	61.3	61.3	61.3	61.3	61.3	61.3	61.3	60.9	60.9	61.3	59.7	61.3	61.3	60.9	61.6	61.6	60.9	61.3	61.3	61.9	62.2	60.2
177	S. algae CCU101	45.6	46.9	47.8	48.8	61.4	62.3	62.2	64.1	65.2	64	65.5	66.9	65.3	66.6	63.1	62.8	64.5	63.6	64.2	60.3	59.7	61.3	61.3	61.3	61.3	61.3	61.3	61.3	61.3	61.3	61.3	61.3	61.3	60.9	60.9	61.3	59.7	61.3	61.3	60.9	61.6	61.6	60.9	61.3	61.3	61.9	62.2	60.2
178	S. algae A94	45.3	46.9	48.1	48.1	61.4	62.3	62.2	64.4	65.8	64	65.5	66.9	65.3	66.6	63.1	62.8	65.1	63.9	63.6	60.3	59.7	61.3	61.3	61.3	61.3	61.3	61.3	61.3	61.3	61.3	61.3	61.3	61.3	60.9	60.9	61.3	59.7	61.3	61.3	60.9	61.6	61.6	60.9	61.3	61.3	61.6	61.9	59.9
179	S. algae JFC2	45.3	46.6	47.5	48.8	61.4	62.3	61.9	64.1	65.5	64	65.5	67.2	65.6	66.9	63.1	62.8	64.5	63.6	63.3	60.3	59.7	60.9	60.9	60.9	60.9	60.9	60.9	60.9	60.9	60.9	60.9	60.9	60.9	60.6	60.6	60.9	59.4	60.9	60.9	60.6	61.3	61.3	60.6	60.9	60.9	61.6	61.9	59.9
180	S. algae VGH117	46	39.5	44	45	51.9	52.8	51.3	53.6	54.7	53.7	54	55.3	54.4	54.4	52.5	51.9	53.7	55.4	55	60.9	48.3	51.7	51.7	51.7	51.7	51.7	51.7	51.7	51.7	51.7	51.7	51.7	51.7	51.7	51.1	51.4	51	51.7	51.7	51.4	52.4	51.4	51.4	51.7	51.4	51.4	51.7	49.7
181	S. algae YHL	45.6	45.9	47.8	48.4	61.4	62.3	62.2	64.4	65.5	64	65.5	66.6	65.3	66.6	63.1	62.8	64.8	63.6	63.3	60.3	59.7	60.9	60.9	60.9	60.9	60.9	60.9	60.9	60.9	60.9	60.9	60.9	60.9	60.6	60.6	60.9	59.4	60.9	60.9	60.6	61.3	61.3	60.6	60.9	60.6	61.3	61.6	59.9
182	S. algae 38A_GOM-205m	45.6	45.9	47.8	48.4	61.4	62.3	62.2	64.4	65.5	64	65.5	66.6	65.3	66.6	63.1	62.8	64.8	63.6	63.3	60.3	59.7	60.9	60.9	60.9	60.9	60.9	60.9	60.9	60.9	60.9	60.9	60.9	60.9	60.6	60.6	60.9	59.4	60.9	60.9	60.6	61.3	61.3	60.6	60.9	60.6	61.3	61.6	59.9
183	S. algae 2NE11	45.6	45.9	47.8	48.4	61.4	62.3	62.2	64.4	65.5	64	65.5	66.6	65.3	66.6	63.1	62.8	64.8	63.6	63.3	60.3	59.7	60.9	60.9	60.9	60.9	60.9	60.9	60.9	60.9	60.9	60.9	60.9	60.9	60.6	60.6	60.9	59.4	60.9	60.9	60.6	61.3	61.3	60.6	60.9	60.6	61.3	61.6	59.9
184	S. algae CLS2	45.6	45.9	47.8	48.4	61.4	62.3	62.2	64.4	65.5	64	65.5	66.6	65.3	66.6	63.1	62.8	64.8	63.6	63.3	60.3	59.7	60.9	60.9	60.9	60.9	60.9	60.9	60.9	60.9	60.9	60.9	60.9	60.9	60.6	60.6	60.9	59.4	60.9	60.9	60.6	61.3	61.3	60.6	60.9	60.6	61.3	61.6	59.9
185	S. algae CCUG-48086	46.3	46.3	47.2	48.4	61.4	62.3	61.9	64.4	65.2	63.7	65.2	66.6	65.6	66.6	62.8	62.5	64.5	63.6	63.3	59.7	59.1	60.3	60.3	60.3	60.3	60.3	60.3	60.3	60.3	60.3	60.3	60.3	60.3	60	60	60.3	59.1	60.3	60.3	60	60.6	60.6	60	60.3	60.3	61.6	61.9	59.4
186	GsulIntIA	35	35.9	35.7	36.3	43.1	43.1	41.1	44	44.2	43.8	43.5	45.1	44.4	45.5	44.2	44.4	42.2	43.5	44	39.2	46.2	42.5	42.5	42.5	42.5	42.5	42.5	42.5	42.5	42.5	42.5	42.5	42.5	42.2	42.2	42.5	41.6	42.5	42.2	41.8	42	42	41.8	41.6	41.6	42.5	42.5	47
187	TdenIntIA	46.9	44.5	47.2	46.3	59.1	60	58.5	59.4	60.3	59.7	62.4	62.1	61.8	61.2	59.4	60	61.2	58.2	57.6	56.1	58	59.1	59.1	59.1	59.1	59.1	59.1	59.1	59.1	59.1	59.1	59.1	59.1	58.8	59.4	59.1	57.9	59.1	59.1	58.8	58.8	60	59.7	58.8	57.9	59.7	59.7	57.6
188	IntI8	47.5	44	46.8	48.4	59	58.6	60.9	60.7	64.3	63.1	63.7	66.9	67.2	65.3	62.8	63.1	59.9	57.8	57.2	59.8	58.8	63	63	63	63	63	63	63	63	63	63	63	63	63	62.7	63	63.3	63	63	62.7	63.3	63.3	63.3	63	62.1	60.5	60.8	61.1
189	IntI7	45.9	46.1	49.8	51.8	58.3	59	60.6	60.1	63.7	61.9	61.8	64.4	64.1	62.5	61.6	60.9	62.3	60.2	60.2	63.7	58.6	59.9	59.9	59.9	59.9	59.9	59.9	59.9	59.9	59.9	59.9	59.9	59.9	59.6	59.9	59.9	60.5	59.9	59.9	59.6	60.2	60.2	59.9	59.9	58.6	58.6	58.6	57.3
190	IntI6	44.9	47.1	48.2	47.9	58.3	58.3	61.9	61.6	62.1	60.7	62.4	63.1	63.4	63.1	61.3	60.9	61.7	63	63.3	62.6	58.8	59.6	59.6	59.6	59.6	59.6	59.6	59.6	59.6	59.6	59.6	59.6	59.6	59.6	59.2	59.6	60.8	59.6	59.6	59.2	60.2	60.2	60.2	59.9	58.3	58.9	59.2	57.6
191	XcaIntIA	45.9	45	49.2	47.7	62.1	62.4	62.1	62.4	64.2	62.8	65.4	64.8	64.2	63.6	61.8	61.5	63.3	59	58.4	55.7	56.6	59.9	59.9	59.9	59.9	59.9	59.9	59.9	59.9	59.9	59.9	59.9	59.9	59.9	59.6	59.9	58.4	59.9	59.9	59.9	59.9	59.6	59.6	59.3	58.4	58.1	58.7	56.7
192	NeuIntIA	47.7	44.6	48	47.7	61.7	61.7	62.8	65.3	64.4	64.3	65.3	68.1	67.8	68.1	65.6	64.4	63.3	61.2	61.2	59.8	58.6	61.6	61.6	61.6	61.6	61.6	61.6	61.6	61.6	61.6	61.6	61.6	61.6	61.6	61.3	61.6	60.1	61.6	61.6	61.6	62.2	61.6	61.3	61.3	61	59.4	59.4	57.6
193	PalcIntIA	47.4	45.8	49.2	47.4	62.7	62.7	65.4	66.6	65.5	61.9	64.9	66.4	66.7	66	63.9	62.6	64.5	64.8	64.2	66	64.1	66.4	66.4	66.4	66.4	66.4	66.4	66.4	66.4	66.4	66.4	66.4	66.4	66.4	66.4	66.4	65.1	66.4	66.4	66	66	66	65.1	65.1	65.4	65.1	65.4	62.3
194	PstuBAMIntIA	43.1	46.1	48.2	46	57.4	58.3	61.3	59.4	60.9	60.7	59.3	61.6	61.6	62.2	60	59.1	56.8	59	59	60.2	55.5	58.6	58.6	58.6	58.6	58.6	58.6	58.6	58.6	58.6	58.6	58.6	58.6	58.6	58.6	58.6	59.2	58.6	58.6	58.6	59.6	58.6	58.6	58.9	58.3	57.4	57.7	55.3
195	IntI3	45.1	43.6	46.8	45.7	57.8	57.2	57.2	61.3	61	62.1	60.1	58.7	58.1	60.4	59.2	59.2	59.2	58.7	58.7	54.9	59.9	58.7	58.7	58.7	58.7	58.7	58.7	58.7	58.7	58.7	58.7	58.7	58.7	58.7	58.4	58.7	58.1	58.7	58.7	59	58.7	59	59	58.4	58.7	57.5	57.8	58.1
196	S. baltica CW2	44.5	41.8	45.7	46.3	57.9	57.3	58.8	61.1	61.1	60.5	62	64.4	62.6	64.7	60.2	60.8	62	58.8	58.8	52.8	56.1	56.7	56.7	56.7	56.7	56.7	56.7	56.7	56.7	56.7	56.7	56.7	56.7	56.7	56.7	56.7	54.9	56.7	56.7	57	57	57.3	56.4	56.4	57	55.8	56.4	57.9
197	P. oryzihabitans KCB005	44.5	41.8	45.7	46.3	57.9	57.3	58.8	61.1	61.1	60.5	62	64.4	62.6	64.7	60.2	60.8	62	58.8	58.8	52.8	56.1	56.7	56.7	56.7	56.7	56.7	56.7	56.7	56.7	56.7	56.7	56.7	56.7	56.7	56.7	56.7	54.9	56.7	56.7	57	57	57.3	56.4	56.4	57	55.8	56.4	57.9
198	S. algae KC-Na-R1 (b)	44.5	41.8	45.7	46.3	57.9	57.3	58.8	61.1	61.1	60.5	62	64.4	62.6	64.7	60.2	60.8	62	58.8	58.8	52.8	56.1	56.7	56.7	56.7	56.7	56.7	56.7	56.7	56.7	56.7	56.7	56.7	56.7	56.7	56.7	56.7	54.9	56.7	56.7	57	57	57.3	56.4	56.4	57	55.8	56.4	57.9
199	S. algae KC-Na-R1 (a)	44.5	41.8	45.7	46.3	57.9	57.3	58.8	61.1	61.1	60.5	62	64.4	62.6	64.7	60.2	60.8	62	58.8	58.8	52.8	56.1	56.7	56.7	56.7	56.7	56.7	56.7	56.7	56.7	56.7	56.7	56.7	56.7	56.7	56.7	56.7	54.9	56.7	56.7	57	57	57.3	56.4	56.4	57	55.8	56.4	57.9
200	S. algae 18064-CSB-B-B	44.5	41.8	45.7	46.3	57.9	57.3	58.8	61.1	61.1	60.5	62	64.4	62.6	64.7	60.2	60.8	62	58.8	58.8	52.8	56.1	56.7	56.7	56.7	56.7	56.7	56.7	56.7	56.7	56.7	56.7	56.7	56.7	56.7	56.7	56.7	54.9	56.7	56.7	57	57	57.3	56.4	56.4	57	55.8	56.4	57.9
201	S. sp. 12P2G11	44.5	41.8	45.7	46.3	57.9	57.3	58.8	61.1	61.1	60.5	62	64.4	62.6	64.7	60.2	60.8	62	59.1	59.1	52.8	56.1	56.7	56.7	56.7	56.7	56.7	56.7	56.7	56.7	56.7	56.7	56.7	56.7	56.7	56.7	56.7	54.9	56.7	56.7	57	57	57.3	56.4	56.4	57	55.8	56.4	57.9
202	S. sp. ALD9	43.9	41.8	45.7	46.3	57.6	57	58.8	60.8	60.8	60.2	61.7	64.1	62.3	64.4	59.9	60.5	61.7	58.8	58.8	52.8	55.8	56.4	56.4	56.4	56.4	56.4	56.4	56.4	56.4	56.4	56.4	56.4	56.4	56.4	56.4	56.4	54.6	56.4	56.4	56.7	56.7	57	56.1	56.1	56.7	55.5	56.1	57.6
203	IntI1	43.9	41.8	45.7	46.3	57.6	57	58.8	60.8	60.8	60.2	61.7	64.1	62.3	64.4	59.9	60.5	61.7	58.8	58.8	52.8	55.8	56.4	56.4	56.4	56.4	56.4	56.4	56.4	56.4	56.4	56.4	56.4	56.4	56.4	56.4	56.4	54.6	56.4	56.4	56.7	56.7	57	56.1	56.1	56.7	55.5	56.1	57.6
204	S. sp. LC6 (b)	44.5	42.7	45.7	46.3	57.6	57	58.8	61.1	61.1	60.2	61.7	64.4	62.6	64.7	60.2	60.8	61.7	58.5	58.5	52.8	56.1	56.4	56.4	56.4	56.4	56.4	56.4	56.4	56.4	56.4	56.4	56.4	56.4	56.4	56.4	56.4	54.6	56.4	56.4	56.7	56.7	57	56.1	56.1	56.7	55.5	56.1	57.6
205	S. sp. LC2 (b)	44.5	42.7	45.7	46.3	57.6	57	58.8	61.1	61.1	60.2	61.7	64.4	62.6	64.7	60.2	60.8	61.7	58.5	58.5	52.8	56.1	56.4	56.4	56.4	56.4	56.4	56.4	56.4	56.4	56.4	56.4	56.4	56.4	56.4	56.4	56.4	54.6	56.4	56.4	56.7	56.7	57	56.1	56.1	56.7	55.5	56.1	57.6
206	S. xiamenensis T17 (d)	44.5	42.7	45.7	46.3	57.6	57	58.8	61.1	61.1	60.2	61.7	64.4	62.6	64.7	60.2	60.8	61.7	58.5	58.5	52.8	56.1	56.4	56.4	56.4	56.4	56.4	56.4	56.4	56.4	56.4	56.4	56.4	56.4	56.4	56.4	56.4	54.6	56.4	56.4	56.7	56.7	57	56.1	56.1	56.7	55.5	56.1	57.6
207	S. xiamenensis T17 (e)	44.5	42.7	45.7	46.3	57.6	57	58.8	61.1	61.1	60.2	61.7	64.4	62.6	64.7	60.2	60.8	61.7	58.5	58.5	52.8	56.1	56.4	56.4	56.4	56.4	56.4	56.4	56.4	56.4	56.4	56.4	56.4	56.4	56.4	56.4	56.4	54.6	56.4	56.4	56.7	56.7	57	56.1	56.1	56.7	55.5	56.1	57.6
208	S. algae CLS1 (b)	44.5	42.7	45.7	46.3	57.6	57	58.8	61.1	61.1	60.2	61.7	64.4	62.6	64.7	60.2	60.8	61.7	58.5	58.5	52.8	56.1	56.4	56.4	56.4	56.4	56.4	56.4	56.4	56.4	56.4	56.4	56.4	56.4	56.4	56.4	56.4	54.6	56.4	56.4	56.7	56.7	57	56.1	56.1	56.7	55.5	56.1	57.6
209	S. baltica 30PF3	44.8	42.1	46	46.6	57.9	57.3	58.8	61.4	61.4	60.8	62.3	64.4	62.6	64.7	60.2	60.8	62	59.1	59.1	53.1	56.4	57	57	57	57	57	57	57	57	57	57	57	57	57	57	57	55.2	57	57	57.3	57.3	57.6	56.7	56.7	57.3	56.1	56.7	58.2
210	S. sp. 15P3A4	44.5	42.1	45.7	46	58.2	57.6	59.1	61.4	61.1	60.5	61.7	64.1	62.3	64.7	60.2	60.5	61.7	59.1	59.1	53.1	56.4	57	57	57	57	57	57	57	57	57	57	57	57	57	57	57	55.2	57	57	57.3	57.3	57.6	56.7	56.7	57.3	56.1	56.7	58.2
[truncated: 161 more columns]
