# Supplementary material for: Novel Mobile Integrons and Strain-Specific Integrase Genes within <em>Shewanella</em> spp. Unveil Multiple Lateral Genetic Transfer Events within the Genus
Source: Preprints.org preprint supplement (doi:10.20944/preprints202204.0173.v1), 2022-04-19
Supplement: Supplementary file 5 [file Table S3. Additional information of integron integrases found in Shewanella spp...xlsx]

## Sheet: IntIs Shewanella Information
Table S3. Additional information of integron integrases found in Shewanella spp..
a,b,c,d,eWhen the strain harbored more than one integron integrases, a letter was designated to differentiate them.
Group	Name (chromosome – plasmid)			Genome Accession Number	IntI type	Protein Accession Number	Keys residues based on amino acid sequences
							E121	R146	K171	A	L	E	R	K219	W229	F233	H277	R280	G302	Y312
A	Shewanella	fodinae	74A	SLWF01000002.1	SfoIntIA	TCN90131.1	E	R	K	R	L	R	D	K	W	F	H	R	G	Y
	Shewanella	fodinae	KCTC 22506	BMXW01000001.1	SfoIntIA	GGY88300.1	E	R	K	R	L	R	D	K	W	F	H	R	G	Y
B	Shewanella	algicola	JCM 31091 (a)	BMQI01000029.1	SalIntIA	GGP58595.1	E	R	K	A	L	T	K	K	W	F	H	R	G	Y
C	Shewanella	sp.	OPT22 (a)	PGVH01000043.1	SoptIntIA	RYV01218.1	E	R	K	A	L	A	Q	K	W	F	H	R	G	Y
	Shewanella	sp.	HS_Bin2	JAAOIN010000225.1	SoptIntIA-like	MBE8168179.1	E	R	K	A	L	A	R	K	W	F	H	R	G	Y
D	Shewanella	gelidii	JCM 30804	BMPZ01000007.1	SgeIntIA	GGI87225.1	E	R	K	A	L	I	R	K	W	F	H	R	G	Y
E	Shewanella	sp.	Glo_26	PIWH01000266.1	SgloIntIA	PIWH01000266.1	E	R	K	A	L	A	R	K	W	F	H	R	G	Y
F	Shewanella	xiamenensis	Sh95 (a)	LGYY01000240.1	IntI9-like	KPN75525.1	E	R	K	G	L	A	R	K	W	F	H	R	G	Y
G	Shewanella	sp.	CG18 big fil WC 8 21 14 2 50 42 11	PCTY01000012.1	SveIntIA	PIQ02082.1	E	R	K	S	L	I	R	K	W	F	H	R	G	Y
	Shewanella	sp.	CG_4_10_14_0_8_um_filter_42_13	PFLD01000049.1	SveIntIA	PIY66847.1	E	R	K	S	L	I	R	K	W	F	H	R	G	Y
	Shewanella	baltica	128	CP028730.1	SveIntIA	WP_107947007.1	E	R	K	S	L	I	R	K	W	F	H	R	G	Y
	Shewanella	vesiculosa	CG-2015-05-42-77	JAACRJ010000028.1	SveIntIA	NCQ40206.1	E	R	K	S	L	I	R	K	W	F	H	R	G	Y
	Shewanella	sp.	SG44-6	JACJER010000286.1	SveIntIA	MBB1392076.1	E	R	K	S	L	I	R	K	W	F	H	R	G	Y
	Shewanella	baltica	NCTC10737	LR134321.1	SveIntIA	VEF25665.1	E	R	K	S	L	I	R	K	W	F	H	R	G	Y
	Shewanella	vesiculosa	CG-2015-07-42-57	JAACRW010000036.1	SveIntIA	NCP38818.1	E	R	K	S	L	I	R	K	W	F	H	R	G	Y
	Shewanella	sp.	SG44-2	JACJEU010000060.1	SveIntIA	MBB1428751.1	E	R	K	S	L	I	R	K	W	F	H	R	G	Y
	Shewanella	vesiculosa	LMG 24424 (a)	RKKD01000022.1	SveIntIA	RPA34131.1	E	R	K	S	L	I	R	K	W	F	H	R	G	Y
	Shewanella	frigidimarina	CG-2015-04-42-94	JAACRB010000035.1	SveIntIA	NCQ47192.1	E	R	K	S	L	I	R	K	W	F	H	R	G	Y
	Shewanella	vesiculosa	CG-2015-09-42-97	JAACSM010000039.1	SveIntIA	NCP71742.1	E	R	K	S	L	I	R	K	W	F	H	R	G	Y
	Shewanella	sp.	CG_4_10_14_3_um_filter_42_91	PFJF01000014.1	SveIntIA	PIX72506.1	E	R	K	S	L	I	R	K	W	F	H	R	G	Y
	Shewanella	sp.	SR43-4	JACJEB010000044.1	SveIntIA	MBB1319958.1	E	R	K	S	L	I	R	K	W	F	H	R	G	Y
	Shewanella	sp.	SR43-8	JACJDX010000021.1	SveIntIA	MBB1323788.1	E	R	K	S	L	I	R	K	W	F	H	R	G	Y
	Shewanella	sp.	CG_4_9_14_0_8_um_filter_42_14	PFTI01000018.1	SveIntIA	PJB91830.1	E	R	K	S	L	I	R	K	W	F	H	R	G	Y
	Shewanella	baltica	OS195 (a)	CP000893.1	SveIntIA	ABX51799.1	E	R	K	S	L	I	R	K	W	F	H	R	G	Y
	Shewanella	sp.	SG41-3 (a)	JACJFJ010000010.1	SveIntIA	MBB1477375.1	E	R	K	S	L	I	R	K	W	F	H	R	G	Y
	Shewanella	denitrificans	OS217	CP000302.1	SveIntIA	ABE54418.1	E	R	K	S	L	I	R	K	W	F	H	R	G	Y
	Shewanella	sp.	SR44-3 (a)	JACJDV010000067.1	SveIntIA	MBB1271137.1	E	R	K	S	L	I	R	K	W	F	H	R	G	Y
	Shewanella	algidipiscicola	H1	NZ_OXJV01000016.1	SveIntIA	WP_110457785.1	E	R	K	S	L	I	R	K	W	F	H	R	G	Y
	Shewanella	sp.	UCD-KL21	NZ_MPHK01000036.1	SveIntIA	WP_076543270.1	E	-	K	S	L	I	R	K	W	F	H	R	G	Y
	Shewanella	sp.	10N.286.48.A6	MCVI01000013.1	SveIntIA	PMI02145.1	E	R	K	S	L	I	R	K	W	F	H	R	G	Y
	Shewanella	sp.	10N.286.48.B5	MCVG01000025.1	SveIntIA	PMH88748.1	E	R	K	S	L	I	R	K	W	F	H	R	G	Y
	Shewanella	sp.	DT_112	JABSSM010000059.1	SveIntIA-like	NRB25015.1	E	R	K	S	L	I	R	K	W	F	H	R	G	Y
	Shewanella	woodyi	ATCC 51908 (b)	CP000961.1	SveIntIA-like	ACA86922.1	E	R	K	S	L	I	K	K	W	F	H	R	G	Y
	Shewanella	hanedai	JCM 20706	VKGK01000014.1	SveIntIA-like	TRY14023.1	E	R	K	S	L	I	K	K	W	F	H	R	G	Y
	Shewanella	piezotolerans	WP3	CP000472.1	SpieIntIA	ACJ28675.1	E	R	K	S	L	I	K	K	W	F	H	R	G	Y
	Shewanella	sp.	Choline-02u-19	PJBE01000013.1	SchoIntIA	PJBE01000013.1	E	R	K	S	L	I	R	K	W	F	H	R	G	Y
	Shewanella	sp.	Bg11-22	PJAZ01000066.1	SchoIntIA	PJAZ01000066.1	E	R	K	S	L	I	R	K	W	F	H	R	G	Y
	Shewanella	japonica	P1-14-1	LKTL01000056.1	SjaIntIA	KPZ67040.1	Q	R	K	S	L	F	R	K	W	F	H	R	G	Y
	Shewanella	sp.	WPAGA9	CP062058.1	SjaIntIA	WP_055026570.1	Q	R	K	S	L	F	R	K	W	F	H	R	G	Y
	Shewanella	japonica	KCTC 22435	CP020472.1	SjaIntIA	ARD22992.1	Q	R	K	S	L	F	R	K	W	F	H	R	G	Y
	Shewanella	japonica	KCTC 12235 (a)	NZ_QPQU01000022.1_4	SjaIntIA	WP_119969713.1	Q	R	K	S	L	F	R	K	W	F	H	R	G	Y
	Shewanella	japonica	UCD-FRSSP16_17	LZFV01000050.1	SjaIntIA	OBT03709.1	Q	R	K	S	L	F	R	K	W	F	H	R	G	Y
	Shewanella	livingstonensis	LMG 19866	CP034015.1	SfriIntIA	AZG72136.1	E	R	K	S	L	L	K	K	W	F	H	R	G	Y
	Shewanella	psychromarinicola	R106	RKKB01000037.1	SfriIntIA	RPA22506.1	E	R	K	S	L	L	K	K	W	F	H	R	G	Y
	Shewanella	psychromarinicola	M2	CP034073.1	SfriIntIA	AZG33662.1	E	R	K	S	L	L	K	K	W	F	H	R	G	Y
	Shewanella	frigidimarina	Ag06-30	LRDC01000022.1	SfriIntIA	KVX01478.1	E	R	K	S	L	L	K	K	W	F	H	R	G	Y
	Shewanella	algicola	JCM 31091 (b)	BMQI01000087.1_9	SfriIntIA	GGP72448.1	E	R	K	S	L	L	K	K	W	F	H	R	G	Y
	Shewanella	sp.	MEBiC00475	CP039928.1	SfriIntIA	WP_137223015.1	E	R	K	S	L	L	K	K	W	F	H	R	G	Y
	Shewanella	polaris	SM1901	CP041036.1	SfriIntIA	QDE33144.1	E	R	K	S	L	L	K	K	W	F	H	R	G	Y
	Shewanella	ulleungensis	JCM 32305	BMQW01000007.1_2	SfriIntIA-like	GGP91461.1	E	R	K	S	L	L	K	K	W	F	H	R	G	Y
	Shewanella	inventionis	CGMCC 1.15339	BMII01000009.1_3	SfriIntIA-like	GGB53753.1	E	R	K	S	L	L	K	K	W	F	H	R	G	Y
	Shewanella	donghaensis	LT17 (a)	CP041783.1	SfriIntIA-like	WP_144208184.1	E	R	K	S	L	I	K	K	W	F	H	R	G	Y
	Shewanella	aestuarii	JCM 17801	BMOT01000015.1	SfriIntIA-like	GGN83658.1	E	R	K	S	L	I	K	K	W	F	H	R	G	Y
	Shewanella	sp.	XMDDZSB0408	WJHV01000018.1	SfriIntIA-like	MRG37638.1	E	R	K	S	L	I	K	K	W	F	H	R	G	Y
	Shewanella	sp.	Actino-trap-3	PJCD01000011.1	SactIntIA	PKG78719.1	E	R	K	A	L	L	R	K	W	F	H	R	G	Y
	Shewanella	sp.	SR44-4	JACJDU010000081.1	SactIntIA	MBB1364627.1	E	R	K	A	L	L	R	K	W	F	H	R	G	Y
	Shewanella	vesiculosa	LMG 24424 (b)	RKKD01000010.1	SactIntIA	RPA46415.1	E	R	K	A	L	L	R	K	W	F	H	R	-	Y
	Shewanella	sp.	SG41-3 (b)	JACJFJ010000004.1	SactIntIA	JACJFJ010000004.1	E	R	K	A	L	L	R	K	W	F	H	R	G	Y
	Shewanella	saliphila	JCM 32304	BMQV01000055.1	SactIntIA-like	GGP67607.1	E	R	K	A	L	L	R	K	W	F	H	R	G	Y
	Shewanella	sp.	WXL01	JAAIKQ010000006.1	SactIntIA-like	NKF51657.1	E	R	K	S	L	L	K	K	W	F	H	R	G	Y
	Shewanella	benthica	KT99	ABIC01000029.1	SactIntIA-like	EDP99888.1	E	R	K	A	L	L	R	K	W	F	H	R	G	Y
	Shewanella	benthica	DB21MT-2	LS483452.1	SactIntIA-like	SQH75991.1	E	R	K	A	L	L	R	K	W	F	H	R	G	Y
	Shewanella	japonica	KCTC 12235 (b)	NZ_QPQU01000017.1_3	SactIntIA-like	WP_119969611.1	E	R	K	A	L	L	R	K	W	F	H	R	G	Y
	Shewanella	sp.	SR44-3 (b)	JACJDV010000037.1	SactIntIA-like	MBB1270584.1	E	R	K	A	L	I	R	K	W	F	H	R	G	Y
	Shewanella	fidelis	ATCC BAA-318	NZ_KI912458	SmarIntIA-like	WP_037410996.1	E	R	K	A	L	H	R	K	W	F	H	R	G	Y
	Shewanella	marina	JCM 15074	BALM01000024.1	SmarIntIA	WP_025822232.1	E	R	K	A	L	H	R	K	W	F	H	R	G	Y
	Shewanella	psychrophila	WP2	CP014782	SmarIntIA-like	AQS38529.1	E	R	K	A	L	H	R	K	W	F	H	R	G	Y
H	Shewanella	sp.	SHSM-M6	JAAXYH010000021	SshIntIA	NMH67033.1	E	R	K	A	L	N	K	K	W	F	H	R	G	Y
	Shewanella	sp.	OPT22 (b)	PGVH01000040.1	SoptBIntIA	RYV02274.1	E	R	K	A	L	S	R	K	W	F	H	R	G	Y
	Shewanella	amazonensis	SB2B (a)	CP000507	SamIntIA	ABL99562.1	E	R	K	A	L	S	V	K	W	F	H	R	G	Y
	Shewanella	sedimentimangrovi	FJAT-52962 (a)	CP071502	SamIntIA-like	QSX38667.1	E	R	K	A	L	S	L	K	W	F	H	R	G	Y
	Shewanella	corallii	A687	QRCS01000022	SamIntIA-like	WP_115137975.1	E	R	K	A	L	S	V	K	W	F	H	R	G	C
	Shewanella	sedimentimangrovi	FJAT-52962 (b)	CP071502	SfjIntIA	QSX39015.1	Q	R	K	A	L	G	R	K	W	F	H	R	G	Y
	Shewanella	khirikhana	TH2012	CP020373.1	SkhiIntIA	AZQ10419.1	Q	R	K	A	L	G	R	K	W	F	H	R	-	Y
	Shewanella	sp.	GutCb	CM009122.1	SguIntIA	PKG74153.1	E	R	K	S	L	G	K	K	W	F	H	R	G	Y
	Shewanella	sp.	KX20019	CP068437.1	SguIntIA	QQX78707.1	E	R	K	S	L	G	K	K	W	F	H	R	G	Y
	Shewanella	sp.	YLB-08	CP045503.1	SguIntIA-like	QPG57981.1	E	R	K	S	L	G	K	K	W	F	H	R	G	Y
	Shewanella	sp.	YLB-06	CP041614.1	SguIntIA-like	QDO84639.1	E	R	K	S	L	G	K	K	W	F	H	R	G	Y
	Shewanella	atlantica	HAW-EB5	RXNV01000002.1	SguIntIA-like	RTR33771.1	E	R	K	S	L	G	K	K	W	F	H	R	G	Y
	Shewanella	woodyi	ATCC 51908 (a)	CP000961.1	SguIntIA-like	ACA88561.1	E	R	K	S	L	G	K	K	W	F	H	R	G	Y
	Shewanella	waksmanii	ATCC BAA-643	NZ_JAEH01000007.1	SguIntIA-like	WP_028772148.1	E	R	K	A	I	A	K	K	W	F	H	R	G	Y
	Shewanella	sp.	Scap07	CP041329.1	SguIntIA-like	QLE85483.1	E	R	K	A	L	A	K	K	W	F	H	R	G	Y
	Shewanella	amazonensis	SB2B (b)	CP000507	SamIntIB	ABL99840.1	E	R	K	A	L	G	R	K	W	F	H	R	G	Y
	Shewanella	sp.	LC6 (a)	CP043902.1	SonIntIA	QQK60795.1	E	R	K	A	L	E	R	K	W	F	H	R	G	Y
	Shewanella	sp.	FDAARGOS_354 ( b)	CP022089.2	SonIntIA	ASF15017.1	E	R	K	A	L	E	R	K	W	F	H	R	G	Y
	Shewanella	xiamenensis	Sh95 (b)	LGYY01000037.1	SonIntIA	KPN78395.1	E	R	K	A	L	E	R	K	W	F	H	R	G	Y
	Shewanella	decolorationis	Ni1-3	CP076856.1	SonIntIA	QWY79362.1	E	R	K	A	L	E	R	K	W	F	H	R	G	Y
	Shewanella	putrefaciens	NCTC12093	LR134303	SonIntIA	VEE60791.1	E	R	K	A	L	E	R	K	W	F	H	R	G	Y
	Shewanella	sp.	FDAARGOS_354 (a)	CP022089.2	SonIntIA	ASF14192.1	E	R	K	A	L	E	R	K	W	F	H	R	G	Y
	Shewanella	xiamenensis	T17 (b)	LDOA01000001.1	SonIntIA	ODR84795.1	E	R	K	A	L	E	R	K	W	F	H	R	G	Y
	Shewanella	sp.	LC2 (a)	VFSJ01000069.1	SonIntIA	TPE57951.1	E	R	K	A	L	E	R	K	W	F	H	R	G	Y
	Shewanella	xiamenensis	AS58	PEGD01000002.1	SonIntIA	PHY63682.1	E	R	K	A	L	E	R	K	W	F	H	R	G	Y
	Shewanella	xiamenensis	T17 (c)	LDOA01000001.1	SonIntIA	ODR87305.1	E	R	K	A	L	E	R	K	W	F	H	R	G	Y
	Shewanella	putrefaciens	200 (a)	CP002457.1	SonIntIA	ADV55458.1	E	R	K	A	L	A	R	K	W	F	H	R	G	Y
	Shewanella	putrefaciens	NCTC10695	UGYP01000001.1	SonIntIA	SUI86741.1	E	R	K	A	L	E	R	K	W	F	H	R	G	Y
	Shewanella	oneidensis	MR-1	AE014299.2	SonIntIA	QKG96659.1	E	R	K	A	L	E	R	K	W	F	H	R	G	Y
	Shewanella	sp.	MR-7	CP000444.1	SonIntIA	ABI43120.1	E	R	K	A	L	E	R	K	W	F	H	R	G	Y
	Shewanella	sp.	BC20	NHRI01000003.1	SonIntIA	PWF64491.1	E	R	K	A	L	E	R	K	W	F	H	R	G	Y
	Shewanella	xiamenensis	T17 (a)	LDOA01000001.1	SonIntIA	ODR84394.1	E	R	K	A	L	E	R	K	W	F	H	R	G	Y
	Shewanella	putrefaciens	200 (b)	CP002457.1	SonIntIA	ADV53230.1	E	R	K	A	L	E	R	K	W	F	H	R	G	Y
	Shewanella	mangrovi	YQH10	JGVI01000006.1	SonIntIA-like	KFZ38610.1	E	R	K	A	L	E	R	K	W	F	H	R	G	Y
	Shewanella	colwelliana	ATCC 39565	NZ_JAEC01000041.1	SonIntIA-like	WP_028764596.1	E	R	K	A	L	E	R	K	W	F	H	R	G	Y
	Shewanella	insulae	JBTF-M18	WRPA00000000	SonIntIA-like	MXR67650.1	E	R	K	A	L	E	R	K	W	F	H	R	G	Y
	Shewanella	sp.	HN-41	AFOZ01000016.1	SonIntIA-like	EGM70790.1	E	R	K	A	L	E	R	K	W	F	H	R	G	Y
	Shewanella	baltica	OS185 (b)	CP000753.1	SonIntIA-like	ABS07826.1	E	R	K	A	L	E	R	K	W	F	H	R	G	Y
	Shewanella	baltica	M1	LWED01000058.1	SonIntIA-like	KZK66259.1	E	R	K	A	L	E	R	K	W	F	H	R	G	Y
	Shewanella	baltica	NCTC10735	UGYM01000002.1	SonIntIA-like	SUI52577.1	E	R	K	A	L	E	R	K	W	F	H	R	G	Y
	Shewanella	sp.	ISTPL2	JAAPAV010000000	SonIntIA-like	WP_173497762.1	E	R	K	A	L	E	R	K	W	F	H	R	G	Y
	Shewanella	baltica	OS195 (b)	CP000891.1	SonIntIA-like	ABX48892.1	E	R	K	A	L	E	R	K	W	F	H	R	G	Y
	Shewanella	baltica	OS678	CP002383.1	SonIntIA-like	ADT93927.1	E	R	K	A	L	E	R	K	W	F	H	R	G	Y
	Shewanella	baltica	OS625	AGEX01000015.1	SonIntIA-like	EHC04140.1	E	R	K	A	L	E	R	K	W	F	H	R	G	Y
	Shewanella	putrefaciens	CIP69.34	AF324211.1	SonIntIA-like	AAK01408.1	E	R	K	A	L	E	R	K	W	F	H	R	G	Y
	Shewanella	baltica	OS185 (a)	CP000753.1	SonIntIA-like	ABS09487.1	E	R	K	A	L	E	R	K	W	F	H	R	G	Y
	Shewanella	putrefaciens	HRCR-6	NZ_KI912533.1	SonIntIA-like	WP_028760238.1	E	R	K	A	L	E	R	K	W	F	H	R	G	Y
	Shewanella	sp.	WE21	CP023019.1	SonIntIA-like	AVI67576.1	E	R	K	A	L	E	R	K	W	F	H	R	G	Y
	Shewanella	canadensis	HAW-EB2	RXNU01000008.1	SonIntIA-like	RTR37978.1	E	R	K	A	L	E	R	K	W	F	H	R	G	Y
	Shewanella	benthica	DSM 8812	JADDKM010000008.1	SonIntIA-like	MBE7214925.1	E	R	K	A	L	E	R	K	W	F	H	R	G	Y
	Shewanella	halifaxensis	HAW-EB4	CP000931.1	SonIntIA-like	ABZ76200.1	E	R	K	A	L	E	R	K	W	F	H	R	G	Y
	Shewanella	schlegeliana	JCM 11561	JAESVD010000006.1	SonIntIA-like	MBL4913697.1	E	R	K	A	L	E	R	K	W	F	H	R	G	Y
	Shewanella	sp.	SR44-3 (c)	JACJDV010000073.1	SonIntIA-like	MBB1271158.1	E	R	K	A	L	G	R	K	W	F	H	R	G	Y
	Shewanella	donghaensis	LT17 (b)	CP041783.1	SonIntIA-like	CP041783.1	E	R	K	A	L	E	R	K	W	F	H	R	G	Y
	Shewanella	cyperi	FJAT-53726	CP071504.1	SonIntIA-like	QSX31444.1	E	R	K	A	L	E	R	K	W	F	H	R	G	Y
	Shewanella	algae	CCUG-50501	JADZHO010000018.1	SonIntIA-like	MBO2654192.1	E	R	K	A	L	E	R	K	W	F	H	R	G	Y
	Shewanella	algae	SA2	LSHE01000001.1	SonIntIA-like	AAK01408.1	E	R	K	A	L	E	R	K	W	F	H	R	G	Y
	Shewanella	algae	A292	JADZHD010000022.1	SonIntIA-like	MBO2552861.1	E	R	K	A	L	E	R	K	W	F	H	R	G	Y
	Shewanella	chilikensis	JC5	NZ_NIJM01000077.1	SonIntIA-like	WP_101057580.1	E	R	K	A	L	E	R	K	W	F	H	R	G	Y
	Shewanella	algae	590722	JADZHH010000027.1	SonIntIA-like	MBO2637477.1	E	R	K	A	L	E	R	K	W	F	H	R	G	Y
	Shewanella	algae	CCUG-526	JADZHY010000017.1	SonIntIA-like	MBO2692464.1	E	R	K	A	L	E	R	K	W	F	H	R	G	Y
	Shewanella	algae	CCUG-38646	JADZHQ010000012.1	SonIntIA-like	MBO2650025.1	E	R	K	A	L	E	R	K	W	F	H	R	G	Y
	Shewanella	algae	A58	JADZGZ010000046.1	SonIntIA-like	MBO2603835.1	E	R	K	A	L	E	R	K	W	F	H	R	G	Y
	Shewanella	algae	150735	CP068229.1	SonIntIA-like	QTE84051.1	E	R	K	A	L	E	R	K	W	F	H	R	G	Y
	Shewanella	algae	10N.286.48.A6	CP068230.1	SonIntIA-like	QTE76414.1	E	R	K	A	L	E	R	K	W	F	H	R	G	Y
	Shewanella	algae	ATCC 51192	JAAXPX010000001.1	SonIntIA-like	NKZ40334.1	E	R	K	A	L	E	R	K	W	F	H	R	G	Y
	Shewanella	algae	JCM 21037	NZ_BALO01000058.1	SonIntIA-like	WP_062793981.1	E	R	K	A	L	E	R	K	W	F	H	R	G	Y
	Shewanella	algae	5043	JADZHW010000023.1	SonIntIA-like	MBO2683861.1	E	R	K	A	L	E	R	K	W	F	H	R	G	Y
	Shewanella	algae	A97	JADZGU010000034.1	SonIntIA-like	MBO2579177.1	E	R	K	A	L	E	R	K	W	F	H	R	G	Y
	Shewanella	algae	CLS3	LVDX01000030.1	SonIntIA-like	TVL60807.1	E	R	K	A	L	E	R	K	W	F	H	R	G	Y
	Shewanella	algae	JCM 14758	NZ_BALL01000080.1	SonIntIA-like	WP_025890107.1	E	R	K	A	L	E	R	K	W	F	H	R	G	Y
	Shewanella	algae	404	JADZHZ010000032.1	SonIntIA-like	MBO2671173.1	E	R	K	A	L	E	R	K	W	F	H	R	G	Y
	Shewanella	algae	CCUG-12945	JADZHV010000016.1	SonIntIA-like	MBO2679632.1	E	R	K	A	L	E	R	K	W	F	H	R	G	Y
	Shewanella	algae	A59	CP068227.1	SonIntIA-like	QTE89145.1	E	R	K	A	L	E	R	K	W	F	H	R	G	Y
	Shewanella	algae	MN-01	LIRM01000048.1	SonIntIA-like	OXS00171.1	E	R	K	A	L	E	R	K	W	F	H	R	G	Y
	Shewanella	algae	CCUG-15259	JADZHU010000020.1	SonIntIA-like	MBO2688300.1	E	R	K	A	L	E	R	K	W	F	H	R	G	Y
	Shewanella	algae	CCUG-789	JADZHX010000026.1	SonIntIA-like	MBO2701057.1	E	R	K	A	L	E	R	K	W	F	H	R	G	Y
	Shewanella	algae	AC	LVDH01000001.1	SonIntIA-like	WP_101057580.1	E	R	K	A	L	E	R	K	W	F	H	R	G	Y
	Shewanella	algae	SYT3	LVDW01000052.1	SonIntIA-like	WP_101057580.1	E	R	K	A	L	E	R	K	W	F	H	R	G	Y
	Shewanella	algae	melkephyllucas	LVDG01000001.1	SonIntIA-like	WP_101057580.1	E	R	K	A	L	E	R	K	W	F	H	R	G	Y
	Shewanella	algae	G1	CP068228.1	SonIntIA-like	QTE88279.1	E	R	K	A	L	E	S	K	W	F	H	R	G	Y
	Shewanella	algae	A56	JADZHB010000024.1	SonIntIA-like	MBO2548181.1	E	R	K	A	L	E	S	K	W	F	H	R	G	Y
	Shewanella	algae	CCUG-20533	JADZHT010000030.1	SonIntIA-like	MBO2666948.1	E	R	K	A	L	E	R	K	W	F	H	R	G	Y
	Shewanella	algae	CCUG-48086	JADZHP010000015.1	SonIntIA-like	MBO2658652.1	E	R	K	A	L	E	R	K	W	F	H	R	G	Y
	Shewanella	chilikensis	KCTC 22540	BMXX01000027.1	SonIntIA-like	GGZ38089.1	E	R	K	A	L	E	R	K	W	F	H	R	G	Y
	Shewanella	algae	CLS1 (a)	LTBI01000004.1_4	SonIntIA-like	TVL09192.1	E	R	K	A	L	E	R	K	W	F	H	R	G	Y
	Shewanella	algae	CCU101	CP018456.1	SonIntIA-like	AXQ16111.1	E	R	K	A	L	E	R	K	W	F	H	R	G	Y
	Shewanella	algae	CSB04KR	MBFW01000036.1	SonIntIA-like	OHY54567.1	E	R	K	A	L	E	R	K	W	F	H	R	G	Y
	Shewanella	algae	A94	JADZGV010000020.1	SonIntIA-like	MBO2591313.1	E	R	K	A	L	E	R	K	W	F	H	R	G	Y
	Shewanella	algae	MARS 14	NZ_LN810019.1	SonIntIA-like	WP_044734644.1	E	R	K	A	L	E	R	K	W	F	H	R	G	Y
	Shewanella	algae	JFC2	LUKM01000031.1	SonIntIA-like	TWO82391.1	E	R	K	A	L	E	R	K	W	F	H	R	G	Y
	Shewanella	algae	VGH117	CP034246.1	SonIntIA-like	QNV05804.1	E	R	K	A	L	E	R	K	W	F	H	R	G	Y
	Shewanella	algae	A93	JADZGW010000019.1	SonIntIA-like	MBO2582759.1	E	R	K	A	L	E	R	K	W	F	H	R	G	Y
	Shewanella	algae	CCUG-56496	JADZHN010000017.1	SonIntIA-like	MBO2633252.1	E	R	K	A	L	E	R	K	W	F	H	R	G	Y
	Shewanella	algae	HUD-I2_24	JADZGQ010000024.1	SonIntIA-like	MBO2557099.1	E	R	K	A	L	E	R	K	W	F	H	R	G	Y
	Shewanella	algae	HUD-H4_26	JADZGR010000026.1	SonIntIA-like	MBO2574033.1	E	R	K	A	L	E	R	K	W	F	H	R	G	Y
	Shewanella	algae	SF7	JADZGP010000016.1	SonIntIA-like	MBO2587020.1	E	R	K	A	L	E	R	K	W	F	H	R	G	Y
	Shewanella	algae	SYT2	LVDW01000052.1	SonIntIA-like	TVL33017.1	E	R	K	A	L	E	R	K	W	F	H	R	G	Y
	Shewanella	algae	YHL	LVDU01000004.1	SonIntIA-like	PBQ27353.1	E	R	K	A	L	E	R	K	W	F	H	R	G	Y
	Shewanella	algae	38A_GOM-205m	NZ_KI912441.1	SonIntIA-like	JADP01000027.1	E	R	K	A	L	E	R	K	W	F	H	R	G	Y
	Shewanella	algae	2NE11	CP055159.1	SonIntIA-like	QNH99315.1	E	R	K	A	L	E	R	K	W	F	H	R	G	Y
	Shewanella	algae	CLS2	LVDV01000056.1	SonIntIA-like	TVL43160.1	E	R	K	A	L	E	R	K	W	F	H	R	G	Y
I	Shewanella	baltica	CW2	CP028355.1	inti1	AVT49498.1	E	R	K	A	L	E	R	K	W	F	H	R	G	Y
	Shewanella	algae	KC-Na-R1 (b)	CP033574.1	inti1	AYV11497.1	E	R	K	A	L	E	R	K	W	F	H	R	G	Y
	Shewanella	algae	KC-Na-R1 (a)	CP033574.1	inti1	AYV11454.1	E	R	K	A	L	E	R	K	W	F	H	R	G	Y
	Shewanella	algae	18064-CSB-B-B	CP047421.1	inti1	QHD51725.1	E	R	K	A	L	E	R	K	W	F	H	R	G	Y
	Shewanella	sp.	12P2G11	MG717479.1	inti1	AVV61730.1	E	R	K	A	L	E	R	K	W	F	H	R	G	Y
	Shewanella	sp.	LC6 (b)	CP043902.1	inti1	QQK62381.1	E	R	K	A	L	E	R	K	W	F	H	R	G	Y
	Shewanella	xiamenensis	T17 (e)	LDOA01000002.1	inti1	ODR83682.1	E	R	K	A	L	E	R	K	W	F	H	R	G	Y
	Shewanella	sp.	LC2 (b)	VFSJ01000026.1	inti1	TPE62986.1	E	R	K	A	L	E	R	K	W	F	H	R	G	Y
	Shewanella	xiamenensis	T17 (d)	LDOA01000002.1	inti1	ODR83648.1	E	R	K	A	L	E	R	K	W	F	H	R	G	Y
	Shewanella	algae	CLS1 (b)	LTBI01000080.1_12	inti1	TVK96596.1	E	R	K	A	L	E	R	K	W	F	H	R	G	Y
	Shewanella	sp.	ALD9	PJCD01000011.1	inti1	PKH30948.1	E	R	K	A	L	E	R	K	W	F	H	R	G	Y
	Shewanella	baltica	30PF3	MG717483.1	inti1	AVV61734.1	E	R	K	A	L	E	R	K	W	F	H	R	G	Y
	Shewanella	sp.	15P3A4	KY963426.1	inti1	AVV61731.1	E	R	K	A	L	E	R	K	W	F	H	R	G	Y
	Integron integrases excluded
	Name			Protein Accession Number
	Shewanella	sp.	UCD-KL21	MPHK01000046.1
	Shewanella	sp.	10N.286.52.B9	MCTY01000219.1
	Shewanella	khirikhana	TH2012	AZQ10062.1
	Shewanella	sp.	NORP246	MBL4817141.1
	Shewanella	putrefaciens	WS13	CP028435.1
	Shewanella	putrefaciens	JCM20190..	BALN01000002.1
	Shewanella	sp.	ISTPL2	JAAPAV010000000
	Shewanella	sp.	UBA8824	HAY93479.1
	Shewanella	psychrophila	WP2	AQS36420.1
	Shewanella	xiamenensis	T17	ODR83671.1
	Shewanella	xiamenensis	CC4-7	ALD16294.1
	Shewanella	putrefaciens	SA70	NGZL01000175.1
	Shewanella	sp.	Shew256	NAJR01000050.1
	Shewanella	maritima	D4-2	QBF84273.1
