# Supplementary material for: Novel Mobile Integrons and Strain-Specific Integrase Genes within <em>Shewanella</em> spp. Unveil Multiple Lateral Genetic Transfer Events within the Genus
Source: Preprints.org preprint supplement (doi:10.20944/preprints202204.0173.v1), 2022-04-19
Supplement: Supplementary file 7 [file Table S4. Shewanella integrases found in other genera..xlsx]

## Sheet: intis Shew vs BLAST_2
	Table S4. Shewanella integrases found in other genera.
	NA*: No found in other genera
Group	IntI type	IntI reference		Host	chromosome	plasmid	Identity %	Coverage %
		Protein Accession Number	Name
A	SfoIntIA	TCN90131.1	Shewanella fodinae 74A	NA*	-----	-----	-----	-----
B	SalIntIA	GGP58595.1	Shewanella algicola JCM31091	Pseudoalteromonas donghaensis HJ51	-	+	78.02	100
				Pseudoalteromonas sp. Bsw20308	-	+	93.48	99
				Pseudoalteromonas arabiensis LST-1	+	-	94.43	100
				Catenovulum sediminis WS1-A	+	-	84.52	100
				Salinimonas marina G2-b	+	-	81.06	99
				Paraglaciecola mesophila GPM4	+	-	79.88	100
				Colwellia sp. PAMC 21821	+	-	78.64	100
				Pseudoalteromonas sp. S1727	draft genome		98.45	100
				Thalassotalea marina KCTC 42731	draft genome		79.57	100
				Bowmanella sp. JS7-9	draft genome		77.64	99
C	SoptIntIA	RYV01218.1	Shewanella sp. OPT22	Parashewanella tropica MEBiC05444	+	-	70.19	100
				Parashewanella curva C51	draft genome		70.81	100
D	SgeIntIA	GGI87225.1	Shewanella gelidii JCM30804	Parashewanella spongiae HJ039	+	-	70.5	100
				Parashewanella spongiae KCTC 22492	draft genome		70.5	100
E	SgloIntIA	PIWH01000266.1	Shewanella sp. Glo_26	Vibrio chagasii ECSMB14107	+	-	98.15	100
				Vibrio kanaloae KH-4	+	-	91.36	100
				Vibrio kanaloae R17	+	-	91.36	100
				Vibrio alginolyticus K08M4	+	-	89.51	100
				Vibrio crassostreae 7Z_4	draft genome		98.77	100
				Vibrio crassostreae 37_O_172	draft genome		98.77	100
				Vibrio splendidus 12E03	draft genome		98.77	100
				Vibrio crassostreae 7F1_18	draft genome		98.77	100
				Vibrio crassostreae 7D8_10	draft genome		98.77	100
				Vibrio crassostreae 46_P_336	draft genome		98.77	100
				Vibrio crassostreae 46_O_330	draft genome		98.77	100
				Vibrio crassostreae 46_O_324	draft genome		98.77	100
				Vibrio crassostreae 45_O_294	draft genome		98.77	100
				Vibrio crassostreae 42_O_252	draft genome		98.77	100
				Vibrio crassostreae 42_O_251	draft genome		98.77	100
				Vibrio crassostreae 40_O_234	draft genome		98.77	100
				Vibrio crassostreae 38_P_218	draft genome		98.77	100
				Vibrio crassostreae 31_O_70	draft genome		98.77	100
				Vibrio crassostreae 38_P_219	draft genome		98.77	100
				Vibrio crassostreae GV1693	draft genome		98.77	100
				Vibrio atlanticus SM1925	draft genome		98.77	100
				Vibrio splendidus 10N.261.49.C11	draft genome		98.77	100
				Vibrio splendidus 10N.261.46.E9	draft genome		98.77	100
				Vibrio coralliirubri J2-31	draft genome		98.46	100
				Vibrio cyclitrophicus 10N.286.52.C10	draft genome		98.46	100
				Vibrio cyclitrophicus 5F59	draft genome		98.46	100
				Vibrio cyclitrophicus FF274	draft genome		98.46	100
				Vibrio cyclitrophicus ZF30	draft genome		98.46	100
				Vibrio cyclitrophicus ZF207	draft genome		98.46	100
				Vibrio cyclitrophicus 10N.286.55.C3	draft genome		98.46	100
				Vibrio cyclitrophicus 10N.286.54.F2	draft genome		98.46	100
				Vibrio cyclitrophicus 10N.286.49.A5	draft genome		98.46	100
				Vibrio cyclitrophicus 10N.286.45.B12	draft genome		98.46	100
				Vibrio cyclitrophicus 10N.261.52.C4	draft genome		98.46	100
				Vibrio cyclitrophicus 10N.222.45.E8	draft genome		98.46	100
				Vibrio cyclitrophicus 10N.286.49.B9	draft genome		98.46	100
				Vibrio lentus 10N.286.49.A12	draft genome		98.46	100
				Vibrio lentus 10N.222.55.B12	draft genome		98.46	100
				Vibrio sp. 10N.286.46.E10	draft genome		98.46	100
				Vibrio sp. 10N.286.45.E10	draft genome		98.46	100
				Vibrio splendidus 10N.222.51.B4	draft genome		98.46	100
				Vibrio splendidus 10N.261.46.B3	draft genome		98.46	100
				Vibrio splendidus 10N.286.48.F2	draft genome		98.46	100
				Vibrio splendidus 10N.286.52.E3	draft genome		98.46	100
				Vibrio splendidus MARa	draft genome		98.46	100
				Vibrio splendidus 5S_122	draft genome		98.46	100
				Vibrio sp. 10N.286.45.A3	draft genome		98.46	100
				Vibrio chagasii 18LP	draft genome		98.46	100
				Vibrio crassostreae SOB1_8	draft genome		98.46	100
				Vibrio coralliirubri Corallo1	draft genome		98.15	100
				Vibrio lentus 10N.286.51.C2	draft genome		98.15	100
				Vibrio lentus 5F79	draft genome		98.15	100
				Vibrio lentus 10N.286.46.A11	draft genome		98.15	100
				Vibrio lentus 10N.286.48.B8	draft genome		98.15	100
				Vibrio lentus 10N.286.46.E4	draft genome		98.15	100
				Vibrio splendidus 0407ZC148	draft genome		98.15	100
				Vibrio splendidus ZS_58	draft genome		98.15	100
				Vibrio splendidus ZS_198	draft genome		98.15	100
				Vibrio splendidus MOR2	draft genome		98.15	100
				Vibrio crassostreae GV1698	draft genome		98.15	100
				Vibrio crassostreae SOB1_6	draft genome		98.15	100
				Vibrio sp. ZF_223	draft genome		98.15	100
				Vibrio cyclitrophicus NCT10V	draft genome		97.84	100
				Vibrio cyclitrophicus ZF205	draft genome		97.84	100
				Vibrio cyclitrophicus UCD-FRSP16_1	draft genome		97.84	100
				Vibrio cyclitrophicus 1F289	draft genome		97.84	100
				Vibrio cyclitrophicus ZF28	draft genome		97.84	100
				Vibrio cyclitrophicus 10N.286.54.F4	draft genome		97.84	100
				Vibrio cyclitrophicus 10N.286.54.E4	draft genome		97.84	100
				Vibrio cyclitrophicus 10N.286.51.B1	draft genome		97.84	100
				Vibrio lentus 10N.261.51.C9	draft genome		97.84	100
				Vibrio lentus 10N.261.45.E3	draft genome		97.84	100
				Vibrio splendidus S7	draft genome		97.84	100
				Vibrio chagasii LC2-408	draft genome		97.84	100
				Vibrio sp. 10N.222.47.A9	draft genome		97.84	100
				Vibrio sp. 10N.261.54.E10	draft genome		97.53	100
				Vibrio splendidus 1S_146	draft genome		97.53	100
				Vibrio cyclitrophicus 10N.286.45.A5	draft genome		97.53	100
				Vibrio cyclitrophicus ZF99	draft genome		97.53	100
				Vibrio cyclitrophicus 10N.286.55.F10	draft genome		97.53	100
				Vibrio cyclitrophicus I3M07	draft genome		97.53	100
				Vibrio cyclitrophicus 10N.286.55.B8	draft genome		97.53	100
				Vibrio cyclitrophicus 10N.286.55.C7	draft genome		97.53	100
				Vibrio cyclitrophicus 10N.286.55.A5	draft genome		97.53	100
				Vibrio cyclitrophicus 10N.286.55.B10	draft genome		97.53	100
				Vibrio cyclitrophicus 1F53	draft genome		97.53	100
				Vibrio cyclitrophicus 1F175	draft genome		97.53	100
				Vibrio cyclitrophicus 10N.286.49.E10	draft genome		97.53	100
				Vibrio cyclitrophicus 10N.286.48.E9	draft genome		97.53	100
				Vibrio cyclitrophicus ZF65	draft genome		97.53	100
				Vibrio cyclitrophicus 10N.286.46.F8	draft genome		97.53	100
				Vibrio crassostreae 47_P_368	draft genome		97.22	100
				Vibrio crassostreae J5-15	draft genome		97.22	100
				Vibrio crassostreae 45_O_313	draft genome		97.22	100
				Vibrio crassostreae 45_O_310	draft genome		97.22	100
				Vibrio crassostreae 45_O_301	draft genome		97.22	100
				Vibrio crassostreae 45_O_292	draft genome		97.22	100
				Vibrio crassostreae 16BF1_56	draft genome		97.22	100
				Vibrio splendidus 13B01	draft genome		97.22	100
				Vibrio cyclitrophicus 10N.261.55.F9	draft genome		97.22	100
				Vibrio cyclitrophicus 10N.261.45.F7	draft genome		97.22	100
				Vibrio cyclitrophicus 10N.222.54.F11	draft genome		97.22	100
				Vibrio cyclitrophicus T5	draft genome		97.22	100
				Vibrio cyclitrophicus T4	draft genome		97.22	100
				Vibrio cyclitrophicus FF75	draft genome		97.22	100
				Vibrio cyclitrophicus 10N.286.54.E8	draft genome		97.22	100
				Vibrio crassostreae 16BF1_28	draft genome		96.91	100
				Vibrio cyclitrophicus 10N.286.49.E3	draft genome		96.91	100
				Vibrio sp. J2-12	draft genome		95.99	100
				Vibrio splendidus OU02	draft genome		95.06	100
				Vibrio parahaemolyticus JW16-32	draft genome		92.59	100
				Vibrio tasmaniensis 1F-187	draft genome		89.81	100
				Vibrio tasmaniensis 10N.261.52.A6	draft genome		89.81	100
				Vibrio sp. VPAP30	draft genome		74.22	100
				Vibrio bivalvicida 605	draft genome		74.22	100
F	IntI9-like	KPN75525.1	Shewanella sp. Sh95	Proteus mirabilis H110 p	-	+	99.65	100
				Proteus mirabilis MPE5139	+	-	99.65	100
				Proteus terrae subsp. cibarius S24-2-1	+	-	99.65	100
				Escherichia coli PK5074	+	-	99.65	100
				Proteus mirabilis AR_0159	+	-	98.96	100
				Pectobacterium parmentieri HC	+	-	98.96	100
				Rheinheimera salexigens KH87	draft genome		99.31	100
				Pseudidiomarina maritima 125B1	draft genome		98.96	100
				Pseudidiomarina tainanensis 86_o	draft genome		98.96	100
				Pseudidiomarina tainanensis 125Bg	draft genome		98.96	100
				Morganella morganii 176	draft genome		98.62	100
				Rheinheimera sp. UJ51	draft genome		91	100
				Alishewanella sp. 16-MA	draft genome		90.31	100
				Colwellia sp. MB02u-6	draft genome		76.12	100
				Psychrosphaera ytuae MTZ26	draft genome		71.97	100
G	SveIntIA	VEF25665.1	Shewanella baltica NCTC10737	Vibrio metschnikovii 07-2421	+	-	100	100
				Vibrio alginolyticus VA181	draft genome		100	100
				Vibrio sp. E4404	draft genome		100	100
				Vibrio fluvialis VF11-74	draft genome		100	100
				Vibrio fluvialis VF062	draft genome		100	100
				Vibrio fluvialis VF046	draft genome		100	100
	SpieIntIA	ACJ28675.1	Shewanella piezotolerans WP3	NA*	-----	-----	-----	-----
	SchoIntIA	PJBE01000013.1	Shewanella sp. Choline-02u	Vibrio metschnikovii 07-2421	+	-	70.83	100
				Vibrio alginolyticus VA181	draft genome		70.83	100
				Vibrio sp. E4404	draft genome		70.83	100
				Vibrio fluvialis VF11-74	draft genome		70.83	100
				Vibrio fluvialis VF062	draft genome		70.83	100
				Vibrio fluvialis VF046	draft genome		70.83	100
	SjaIntIA	ARD22992.1	Shewanella japonica KCTC22435	Paraferrimonas sp. SM1919	draft genome		70.13	100
	SfriIntIA	KVX01478.1	Shewanella frigidimarina Ag06-30	NA*	-----	-----	-----	-----
	SactIntIA	PKG78719.1	Shewanella sp. Actino-trap-3	Pseudoalteromonas piscicida 2515	-	+	71.7	100
				Pseudoalteromonas xiamenensis STKMTI.2	+	-	73.4	100
				Pseudoalteromonas sp. M8	+	-	71.7	100
				Pseudoalteromonas sp. THAF3	+	-	74.13	99
				Pseudoalteromonas aurantia 208	draft genome		77.99	100
				Pseudoalteromonas sp. MMG013	draft genome		77.99	100
				Pseudoalteromonas sp. T1lg48	draft genome		74.21	100
				Pseudoalteromonas sp. A601	draft genome		78.8	99
				Pseudoalteromonas sp. H105	draft genome		78.16	99
	SmarIntIA	WP_025822232.1	Shewanella marina JCM15074	NA*	-----	-----	-----	-----
H	SshIntIA	NMH67033.1	Shewanella sp. SHSM-M6	Oleispira antarctica RB-8	+	-	71.03	99
	SamIntIA	ABL99562.1	Shewanella amazonensis SB2B	NA*	-----	-----	-----	-----
	SfjIntIA	QSX39015.1	Shewanella sp. FJAT-52962	NA*	-----	-----	-----	-----
	SkhiIntIA	AZQ10419.1	Shewanella khirikhana TH2012	NA*	-----	-----	-----	-----
	SoptBIntIA	RYV02274.1	Shewanella sp. OPT22	Parashewanella spongiae HJ039	+	-	87.07	99
				Parashewanella spongiae KCTC 22492	draft genome		86.97	100
				Thalassomonas viridans XOM25	draft genome		70.76	99
	SguIntIA	PKG74153.1	Shewanella sp. GutCb	NA*	-----	-----	-----	-----
	SonIntIA	QKG96659.1	Shewanella oneidensis MR-1	Pseudoalteromonas piscicida DE1-A	+	-	94.04	100
				Pseudoalteromonas piscicida JCM 20779	+	-	93.73	100
				Vibrio fluvialis 2013V-1197	+	-	93.1	100
				Vibrio fluvialis A8	+	-	89.97	100
				Vibrio fluvialis ATCC 33809	+	-	89.66	100
				Vibrio fluvialis 2013V-1044	+	-	88.48	100
				Vibrio fluvialis 2012V-1235	+	-	87.68	100
				Vibrio fluvialis F8658	+	-	86.83	100
				Thaumasiovibrio occultus C4II189	+	-	86.52	100
				Vibrio fluvialis 2012V-1235	+	-	85.27	100
				Vibrio cholerae PNUSAV001730	draft genome		96.24	100
				Vibrio cholerae PNUSAV001846	draft genome		96.24	100
				Pseudoalteromonas sp. PS5	draft genome		94.67	100
				Pseudoalteromonas sp. JC28	draft genome		94.04	100
				Vibrio fluvialis GCEnv6	draft genome		94.04	100
				Pseudoalteromonas piscicida ATCC 15057	draft genome		93.73	100
				Vibrio plantisponsor LMG 24470	draft genome		93.73	100
				Vibrio parahaemolyticus S001	draft genome		89.66	100
				Agarivorans sp. Alg241-V36	draft genome		73.9	99
I	IntI1	AVT49498.1	Shewanella baltica CW2	Enterobacter cloacae STN0717-73	-	+	100	100
				Aeromonas salmonicida subsp. salmonicida A449	-	+	100	100
				Salmonella enterica subsp. enterica serovar Heidelberg str. CFSAN002069	-	+	100	100
				Enterobacter kobei STW0522-51	-	+	100	100
				Enterobacter hormaechei STN0717-64	-	+	100	100
				Pantoea sp. PSNIH1	-	+	100	100
				Citrobacter freundii L75	-	+	100	100
				Yersinia enterocolitica CFS1932	-	+	100	100
				Pseudomonas aeruginosa DHS01	+	-	100	100
				Alcaligenes faecalis MUB14	+	-	100	100
				Pseudomonas putida DLL-E4	+	-	100	100
				Atlantibacter hermannii 3608	draft genome		100	100
				Vibrio cholerae E306	draft genome		100	100
				Morganella morganii SCsl21	draft genome		100	100
				Leclercia adecarboxylata WX284	draft genome		100	100
				Hydrogenophaga intermedia S1	draft genome		100	100
				Serratia marcescens SER_520	draft genome		100	100
				Shigella flexneri DMB SH108	draft genome		100	100
				Idiomarina tyrosinivorans CC-PW-9	draft genome		100	100
				Escherichia coli 46A_L1	draft genome		100	100
				Klebsiella pneumoniae MGH81	draft genome		100	100
