# Supplementary material for: Novel Mobile Integrons and Strain-Specific Integrase Genes within <em>Shewanella</em> spp. Unveil Multiple Lateral Genetic Transfer Events within the Genus
Source: Preprints.org preprint supplement (doi:10.20944/preprints202204.0173.v1), 2022-04-19
Supplement: Supplementary file 9 [file Table S5. Source of Shewanella genomes harboring integron integrases.xlsx]

## Sheet: Hoja1
Table S5. Source of Shewanella genomes harboring integron integrases
IntI type in red correspond to integrase found in plasmid
aquatic niches, sediments
animal-host
clinical samples
hospital environment
other impacted niches
ND
Name			IntI type					Source
			1	2	3	4	5
Shewanella	fodinae	74A	SfoIntIA
Shewanella	fodinae	KCTC 22506	SfoIntIA
Shewanella	algicola	JCM 31091	SalIntIA	SfriIntIA
Shewanella	sp.	OPT22	SoptIntIA	SoptBIntIA
Shewanella	sp.	HS_Bin2	SoptIntIA-like
Shewanella	gelidii	JCM 30804	SgeIntIA
Shewanella	sp.	Glo_26	SgloIntIA
Shewanella	xiamenensis	Sh95	IntI9-like	SonIntIA
Shewanella	sp.	CG18 big fil WC 8 21 14 2 50 42 11	SveIntIA
Shewanella	sp.	CG_4_10_14_0_8_um_filter_42_13	SveIntIA
Shewanella	baltica	128	SveIntIA
Shewanella	vesiculosa	CG-2015-05-42-77	SveIntIA
Shewanella	sp.	SG44-6	SveIntIA
Shewanella	baltica	NCTC10737	SveIntIA
Shewanella	vesiculosa	CG-2015-07-42-57	SveIntIA
Shewanella	sp.	SG44-2	SveIntIA
Shewanella	vesiculosa	LMG 24424	SveIntIA	SactIntIA
Shewanella	frigidimarina	CG-2015-04-42-94	SveIntIA
Shewanella	vesiculosa	CG-2015-09-42-97	SveIntIA
Shewanella	sp.	CG_4_10_14_3_um_filter_42_91	SveIntIA
Shewanella	sp.	SR43-4	SveIntIA
Shewanella	sp.	SR43-8	SveIntIA
Shewanella	sp.	CG_4_9_14_0_8_um_filter_42_14	SveIntIA
Shewanella	baltica	OS195	SveIntIA	SonIntIA-like
Shewanella	sp.	SG41-3	SveIntIA	SactIntIA
Shewanella	denitrificans	OS217	SveIntIA
Shewanella	sp.	SR44-3	SveIntIA	SactIntIA-like	SonIntIA-like
Shewanella	algidipiscicola	H1	SveIntIA
Shewanella	sp.	UCD-KL21	SveIntIA
Shewanella	sp.	10N.286.48.A6	SveIntIA
Shewanella	sp.	10N.286.48.B5	SveIntIA
Shewanella	sp.	DT_112	SveIntIA-like
Shewanella	woodyi	ATCC 51908	SveIntIA-like	SguIntIA-like
Shewanella	hanedai	JCM 20706	SveIntIA-like
Shewanella	piezotolerans	WP3	SpieIntIA
Shewanella	sp.	Choline-02u-19	SchoIntIA
Shewanella	sp.	Bg11-22	SchoIntIA
Shewanella	japonica	P1-14-1	SjaIntIA
Shewanella	sp.	WPAGA9	SjaIntIA
Shewanella	japonica	KCTC 22435	SjaIntIA
Shewanella	japonica	KCTC 12235	SjaIntIA	SactIntIA-like
Shewanella	japonica	UCD-FRSSP16_17	SjaIntIA
Shewanella	livingstonensis	LMG 19866	SfriIntIA
Shewanella	psychromarinicola	R106	SfriIntIA
Shewanella	psychromarinicola	M2	SfriIntIA
Shewanella	frigidimarina	Ag06-30	SfriIntIA
Shewanella	sp.	MEBiC00475	SfriIntIA
Shewanella	polaris	SM1901	SfriIntIA
Shewanella	ulleungensis	JCM 32305	SfriIntIA-like
Shewanella	inventionis	CGMCC 1.15339	SfriIntIA-like
Shewanella	donghaensis	LT17	SfriIntIA-like	SonIntIA-like
Shewanella	aestuarii	JCM 17801	SfriIntIA-like
Shewanella	sp.	XMDDZSB0408	SfriIntIA-like
Shewanella	sp.	Actino-trap-3	SactIntIA
Shewanella	sp.	SR44-4	SactIntIA
Shewanella	saliphila	JCM 32304	SactIntIA-like
Shewanella	sp.	WXL01	SactIntIA-like
Shewanella	benthica	KT99	SactIntIA-like
Shewanella	benthica	DB21MT-2	SactIntIA-like
Shewanella	fidelis	ATCC BAA-318	SmarIntIA-like
Shewanella	marina	JCM 15074	SmarIntIA
Shewanella	psychrophila	WP2	SmarIntIA-like
Shewanella	sp.	SHSM-M6	SshIntIA
Shewanella	amazonensis	SB2B	SamIntIA	SamIntIB
Shewanella	sedimentimangrovi	FJAT-52962	SamIntIA-like	SfjIntIA
Shewanella	corallii	A687	SamIntIA-like
Shewanella	khirikhana	TH2012	SkhiIntIA
Shewanella	sp.	GutCb	SguIntIA
Shewanella	sp.	KX20019	SguIntIA
Shewanella	sp.	YLB-08	SguIntIA-like
Shewanella	sp.	YLB-06	SguIntIA-like
Shewanella	atlantica	HAW-EB5	SguIntIA-like
Shewanella	waksmanii	ATCC BAA-643	SguIntIA-like
Shewanella	sp.	Scap07	SguIntIA-like
Shewanella	sp.	LC6	SonIntIA	IntI1
Shewanella	sp.	FDAARGOS_354	SonIntIA	SonIntIA
Shewanella	decolorationis	Ni1-3	SonIntIA
Shewanella	putrefaciens	NCTC12093	SonIntIA
Shewanella	xiamenensis	T17	SonIntIA	SonIntIA	SonIntIA	IntI1	IntI1
Shewanella	sp.	LC2	SonIntIA	IntI1
Shewanella	xiamenensis	AS58	SonIntIA
Shewanella	putrefaciens	200	SonIntIA	SonIntIA
Shewanella	putrefaciens	NCTC10695	SonIntIA
Shewanella	oneidensis	MR-1	SonIntIA
Shewanella	sp.	MR-7	SonIntIA
Shewanella	sp.	BC20	SonIntIA
Shewanella	mangrovi	YQH10	SonIntIA-like
Shewanella	colwelliana	ATCC 39565	SonIntIA-like
Shewanella	insulae	JBTF-M18	SonIntIA-like
Shewanella	sp.	HN-41	SonIntIA-like
Shewanella	baltica	M1	SonIntIA-like
Shewanella	baltica	NCTC10735	SonIntIA-like
Shewanella	sp.	ISTPL2	SonIntIA-like
Shewanella	baltica	OS678	SonIntIA-like
Shewanella	baltica	OS625	SonIntIA-like
Shewanella	putrefaciens	CIP69.34	SonIntIA-like
Shewanella	baltica	OS185	SonIntIA-like	SonIntIA-like
Shewanella	putrefaciens	HRCR-6	SonIntIA-like
Shewanella	sp.	WE21	SonIntIA-like
Shewanella	canadensis	HAW-EB2	SonIntIA-like
Shewanella	benthica	DSM 8812	SonIntIA-like
Shewanella	halifaxensis	HAW-EB4	SonIntIA-like
Shewanella	schlegeliana	JCM 11561	SonIntIA-like
Shewanella	cyperi	FJAT-53726	SonIntIA-like
Shewanella	algae	CCUG-50501	SonIntIA-like
Shewanella	algae	SA2	SonIntIA-like
Shewanella	algae	A292	SonIntIA-like
Shewanella	chilikensis	JC5	SonIntIA-like
Shewanella	algae	590722	SonIntIA-like
Shewanella	algae	CCUG-526	SonIntIA-like
Shewanella	algae	CCUG-38646	SonIntIA-like
Shewanella	algae	A58	SonIntIA-like
Shewanella	algae	150735	SonIntIA-like
Shewanella	algae	CECT 5071	SonIntIA-like
Shewanella	algae	ATCC 51192	SonIntIA-like
Shewanella	algae	JCM 21037	SonIntIA-like
Shewanella	algae	5043	SonIntIA-like
Shewanella	algae	A97	SonIntIA-like
Shewanella	algae	CLS3	SonIntIA-like
Shewanella	algae	JCM 14758	SonIntIA-like
Shewanella	algae	404	SonIntIA-like
Shewanella	algae	CCUG-12945	SonIntIA-like
Shewanella	algae	A59	SonIntIA-like
Shewanella	algae	MN-01	SonIntIA-like
Shewanella	algae	CCUG-15259	SonIntIA-like
Shewanella	algae	CCUG-789	SonIntIA-like
Shewanella	algae	AC	SonIntIA-like
Shewanella	algae	SYT3	SonIntIA-like
Shewanella	algae	melkephyllucas	SonIntIA-like
Shewanella	algae	G1	SonIntIA-like
Shewanella	algae	A56	SonIntIA-like
Shewanella	algae	CCUG-20533	SonIntIA-like
Shewanella	algae	CCUG-48086	SonIntIA-like
Shewanella	chilikensis	KCTC 22540	SonIntIA-like
Shewanella	algae	CLS1	SonIntIA-like	IntI1
Shewanella	algae	CCU101	SonIntIA-like
Shewanella	algae	CSB04KR	SonIntIA-like
Shewanella	algae	A94	SonIntIA-like
Shewanella	algae	MARS 14	SonIntIA-like
Shewanella	algae	JFC2	SonIntIA-like
Shewanella	algae	VGH117	SonIntIA-like
Shewanella	algae	A93	SonIntIA-like
Shewanella	algae	CCUG-56496	SonIntIA-like
Shewanella	algae	HUD-I2_24	SonIntIA-like
Shewanella	algae	HUD-H4_26	SonIntIA-like
Shewanella	algae	SF7	SonIntIA-like
Shewanella	algae	SYT2	SonIntIA-like
Shewanella	algae	YHL	SonIntIA-like
Shewanella	algae	38A_GOM-205m	SonIntIA-like
Shewanella	algae	2NE11	SonIntIA-like
Shewanella	algae	CLS2	SonIntIA-like
Shewanella	baltica	CW2	IntI1
Shewanella	algae	KC-Na-R1 (a)	IntI1	IntI1
Shewanella	algae	18064-CSB-B-B	IntI1
Shewanella	sp.	12P2G11	IntI1
Shewanella	sp.	ALD9	IntI1
Shewanella	baltica	30PF3	IntI1
Shewanella	sp.	15P3A4	IntI1
