# Supplementary material for: Novel Mobile Integrons and Strain-Specific Integrase Genes within <em>Shewanella</em> spp. Unveil Multiple Lateral Genetic Transfer Events within the Genus
Source: Preprints.org preprint supplement (doi:10.20944/preprints202204.0173.v1), 2022-04-19
Supplement: Supplementary file 11 [file Table S6. CALINs in complete genomes of Shewanella spp...xlsx]

## Sheet: Hoja1
Table S6. CALINs in complete genomes of Shewanella spp..
Organism Name	Strain	# CALIN	# attC sites
			1	2	3	4	5	6
Shewanella aestuarii	PN3F2	0	0	0	0	0	0	0
Shewanella algae	A291	0	0	0	0	0	0	0
Shewanella chilikensis	DC57	0	0	0	0	0	0	0
Shewanella litorisediminis	SMK1-12	0	0	0	0	0	0	0
Shewanella sediminis	HAW-EB3	0	0	0	0	0	0	0
Shewanella sp.	Arc9-LZ	0	0	0	0	0	0	0
Shewanella sp.	FJAT-53720	0	0	0	0	0	0	0
Shewanella sp.	LZH-2	0	0	0	0	0	0	0
Shewanella sp.	YLB-09	0	0	0	0	0	0	0
Shewanella sp.	SNU WT4	0	0	0	0	0	0	0
Shewanella bicestrii	JAB-1	1	1	0	0	0	0	0
Shewanella baltica	OS155	2	2	0	0	0	0	0
Shewanella frigidimarina	NCIMB 400	1	1	0	0	0	0	0
Shewanella baltica	BA175	6	6	0	0	0	0	0
Shewanella marisflavi	EP1	1	1	0	0	0	0	0
Shewanella marisflavi	ECSMB14101	2	2	0	0	0	0	0
Shewanella pealeana	ATCC 700345	6	6	0	0	0	0	0
Shewanella putrefaciens	CN-32	3	3	0	0	0	0	0
Shewanella baltica	OS117	1	1	0	0	0	0	0
Shewanella baltica	OS183	5	5	0	0	0	0	0
Shewanella violacea	DSS12	1	1	0	0	0	0	0
Shewanella putrefaciens	CGMCC-1.6515	1	0	1	0	0	0	0
Shewanella putrefaciens	XY07	2	0	2	0	0	0	0
Shewanella loihica	PV-4	3	0	2	1	0	0	0
Shewanella baltica	OS223	4	3	1	0	0	0	0
Shewanella sp.	ANA-3	10	9	1	0	0	0	0
Shewanella algae	RQs-106	1	0	1	0	0	0	0
Shewanella sp.	FJAT-51800	1	0	0	1	0	0	0
Shewanella decolorationis	sesselensis	4	3	0	1	0	0	0
Shewanella sp.	Pdp11	2	1	1	0	0	0	0
Shewanella putrefaciens	FDAARGOS_681	1	0	0	1	0	0	0
Shewanella putrefaciens	ATCC 8071	2	0	2	0	0	0	0
Shewanella sp.	W3-18-1	4	3	1	0	0	0	0
Shewanella sp.	MR-4	5	2	3	0	0	0	0
Shewanella putrefaciens	WS13	5	3	2	0	0	0	0
Shewanella maritima	D4-2	2	1	0	1	0	0	0
Shewanella xiamenensis	T17	2	0	1	1	0	0	0
Shewanella baltica	OS195	5	4	1	0	0	0	0
Shewanella putrefaciens	200	6	5	1	0	0	0	0
Shewanella baltica	OS185	5	3	2	0	0	0	0
Shewanella algae	KC-Na-R1	4	3	1	0	0	0	0
Shewanella amazonensis	SB2B	3	3	0	0	0	0	0
Shewanella sp.	LC6	2	2	0	0	0	0	0
Shewanella woodyi	ATCC 51908	2	0	1	0	1	0	0
Shewanella sp.	FDAARGOS_354	2	2	0	0	0	0	0
Shewanella japonica	KCTC 22435	5	3	2	0	0	0	0
Shewanella baltica	128	2	2	0	0	0	0	0
Shewanella cyperi	FJAT-53726	1	0	1	0	0	0	0
Shewanella sp.	KX20019	2	0	1	1	0	0	0
Shewanella psychromarinicola	M2	1	1	0	0	0	0	0
Shewanella sp.	MEBiC00475	1	0	1	0	0	0	0
Shewanella halifaxensis	HAW-EB4	2	2	0	0	0	0	0
Shewanella algae	VGH117	2	0	2	0	0	0	0
Shewanella algae	18064-CSB-B-B	4	4	0	0	0	0	0
Shewanella algae	CCU101	6	6	0	0	0	0	0
Shewanella algae	150735	2	0	2	0	0	0	0
Shewanella algae	G1	1	0	1	0	0	0	0
Shewanella algae	A59	2	0	2	0	0	0	0
Shewanella baltica	CW2	2	1	1	0	0	0	0
Shewanella baltica	OS678	5	5	0	0	0	0	0
Shewanella decolorationis	Ni1-3	1	0	1	0	0	0	0
Shewanella benthica	DB21MT-2	2	2	0	0	0	0	0
Shewanella piezotolerans	WP3	5	4	1	0	0	0	0
Shewanella oneidensis	MR-1	3	3	0	0	0	0	0
Shewanella putrefaciens	NCTC12093	5	2	2	0	0	1	0
Shewanella sp.	MR-7	3	1	2	0	0	0	0
Shewanella khirikhana	TH2012	1	1	0	0	0	0	0
Shewanella sp.	WE21	4	2	2	0	0	0	0
Shewanella sp.	WPAGA9	4	0	2	0	1	0	1
Shewanella polaris	SM1901	0	0	0	0	0	0	0
Shewanella psychrophila	WP2	0	0	0	0	0	0	0
Shewanella sp.	YLB-08	0	0	0	0	0	0	0
Shewanella algae	CECT 5071	0	0	0	0	0	0	0
Shewanella baltica	NCTC10737	0	0	0	0	0	0	0
Shewanella algae	2NE11	0	0	0	0	0	0	0
Shewanella sedimentimangrovi	FJAT-52962	0	0	0	0	0	0	0
Shewanella sp.	YLB-06	0	0	0	0	0	0	0
Shewanella sp.	Scap07	0	0	0	0	0	0	0
Shewanella denitrificans	OS217	0	0	0	0	0	0	0
Shewanella donghaensis	LT17	0	0	0	0	0	0	0
Shewanella livingstonensis	LMG 19866	0	0	0	0	0	0	0
