# Supplementary material for: Novel Mobile Integrons and Strain-Specific Integrase Genes within <em>Shewanella</em> spp. Unveil Multiple Lateral Genetic Transfer Events within the Genus
Source: Preprints.org preprint supplement (doi:10.20944/preprints202204.0173.v1), 2022-04-19
Supplement: Supplementary file 13 [file Table S7. Description of genes and cassettes genes.xlsx]

## Sheet: Sheet37
Table S7. Description of genes and cassettes genes
Abreviature	Name	Description
aaa	AAA family ATPase	AAA proteins or ATPases Associated with diverse cellular Activities are a protein family sharing a common conserved module of approximately 230 amino acid residues.
aac(6`)-lb7	AAC(6')-Ib7	aminoglycoside acetyltransferase
aacC1	aacc1	aminoglycoside acetyltransferase
aadA16	aadA16	aadA16 is an aminoglycoside nucleotidyltransferase gene
aadA1e	aadA1e	aminoglycoside nucleotidyltransferase
aadA2	aadA2	aminoglycoside nucleotidyltransferase
aadA24	aadA24	aadA24 is an integron-encoded aminoglycoside nucleotidyltransferase gene
aadB	aadB	2''-aminoglycoside nucleotidyltransferase
ABC	ABC transporter permease	ABC transporter is a large family mainly comprising high-affinity branched-chain amino acid transporter proteins such as Escherichia coli LivH P08340 and LivM P22729 both of which are from the LIV-I transport system.
acyl	Acyltransferase	Acyltransferase catalyzes the acylation of various substrates including peptidoglycan and sugars
ar	ankyrin repeat domain-containing protein	The ankyrin repeat is one of the most frequently observed amino acid motifs in protein databases. This protein–protein interaction module is involved in a diverse set of cellular functions, and consequently, defects in ankyrin repeat proteins have been found in a number of human diseases.
arr-2	Arr-2	arr-2 is an integron-encoded ribosyltransferase
arr-3	Arr-3	arr-3 is a plasmid-encoded ribosyltransferase
atpb	ATP-binding protein	ATP-binding protein containing an AAA (ATPases Associated with a wide variety of cellular Activities) domain, may function as an ATPase
benE	Benzoate/H(+) symporter BenE family transporter	The benzoate:H symporter (BenE) family (TC# 2.A.46) is a member of the APC Superfamily. The BenE family contains only two functionally characterized and sequenced members, the benzoate permeases of Acinetobacter calcoaceticus and E. coli.
blaOXA-10	BlaOXA-10	Beta-lactamase
blaVEB-1	BlaVEB-1	VEB-1 is a beta-lactamase
blaVEB-16	BlaVEB-16	Beta-lactamase
C GII intron	C GII intron	Group II intron
C-attC GII intron	C-attC GII intron	Group II intron
cdf	cation transporter of the cation diffusion facilitator	CDF family that facilitates the active efflux of one or more from a variety of metal cations including Zn, Cd, Ni, Co, Mn, and Cu
CI1 GII intron	CI1 GII intron	Group II intron
cks	3-deoxy-manno-octulosonate cytidylyltransferase	This enzyme participates in lipopolysaccharide biosynthesis.
clmA5	clmA5	encoding the efflux MFS transporter
coA	CoA transferase subunit B	CoA-transferases catalyse reversible transfer reactions of coenzyme A groups from CoA-thioesters to free acids.
cobO	cob(I)yrinic acid a,c-diamide adenosyltransferase	cob(I)yrinic acid a,c-diamide adenosyltransferase catalyzes the formation of the cobalt-carbon bond in the biosynthetic pathway for adenosylcobalamin
CocE/NonD	CocE/NonD family hydrolase	dipeptidyl-peptidase activity
ctp	3-deoxy-manno-octulosonate cytidylyltransferase	Cytidylyltransferase. This family consists of two main Cytidylyltransferase activities: 1) 3-deoxy-manno-octulosonate cytidylyltransferase, 2) acylneuraminate cytidylyltransferase.
cysZ	sulfate transporter CysZ	High affinity, high specificity proton-dependent sulfate transporter, which mediates sulfate uptake. Provides the sulfur source for the cysteine synthesis pathway. Does not transport thiosulfate.
cyt C	cytochrome C	decaheme c-type cytochrome, OmcA/MtrC family; The protein SO_1778 (MtrC) of Shewanella oneidensis MR-1, and its paralog SO_1779 (OmcA), with which it intteracts, are large decaheme proteins, about 900 amino acids in length, involved in the use of manganese [Mn(III/IV)] and iron [Fe(III)] as terminal electron acceptors.
cyt c3	cytochrome c3 family protein	cytochrome c3 (class III cytochrome c) family protein similar to Paracoccus pantotrophus cytochrome c-type protein NapC that mediates electron flow from quinones to the NapAB complex
dcu	anaerobic C4-dicarboxylate transporter	These proteins are members of the C4-Dicarboxylate Uptake (Dcu) family. - anaerobic C4-dicarboxylate transporter is responsible for the transport of C4-dicarboxylates from the periplasm across the inner membrane
ddx	DEAD/DEAH box helicase family protein	The DEAD/DEAH box helicases are a family of proteins whose purpose is to unwind nucleic acids. The DEAD box helicases are involved in various aspects of RNA metabolism, including nuclear transcription, pre mRNA splicing, ribosome biogenesis, nucleocytoplasmic transport, translation, RNA decay and organellar gene expression.
DegT_DnrJ_EryC1	DegT/DnrJ/EryC1/StrS family aminotransferase	The members of this family are probably all pyridoxal-phosphate-dependent aminotransferase enzymes with a variety of molecular functions.
dfrA12	trimethoprim resistant dihydrofolate reductase dfr	dfrA12 is an integron-encoded dihydrofolate reductase
dfrA15	trimethoprim resistant dihydrofolate reductase dfr	dfrA15 is an integron-encoded dihydrofolate reductase.
dfrA27	trimethoprim resistant dihydrofolate reductase dfr	A dihydrofolate reductase and trimethoprim resistance gene
dgc	diguanylate cyclase	Diguanylate cyclases (DGCs) synthesize c-di-GMP; phosphodiesterases (PDEs) catalyze its breakdown
dnaJ-like	heat shock protein DnaJ-like protein	The dnaJ gene encodes the DnaJ protein, which is also known as Hsp40, and it is a member of the heat shock protein (Hsp) family
dsbA	DsbA family protein	DsbA is a bacterial thiol disulfide oxidoreductase (TDOR). DsbA is a key component of the Dsb (disulfide bond) family of enzymes. DsbA catalyzes intrachain disulfide bond formation as peptides emerge into the cell's periplasm
duf1097	duf1097	Domain of unknown function
duf188	duf188	DUF188 is a family of well conserved, uncharacterized bacterial proteins from a wide range of taxonomic phyla.
duf2059	duf2059	Domain of unknown function
duf262	duf262	Domain of unknown function
duf2695	duf2695	Domain of unknown function
duf2806	duf2806	Domain of unknown function
duf2846	duf2846	Domain of unknown function
duf2897	duf2897	Domain of unknown function
duf2913	duf2913	Domain of unknown function
duf2971	duf2971	Domain of unknown function
duf3147	duf3147	Domain of unknown function
duf3265	duf3265	Domain of unknown function
duf3488	duf3488	Domain of unknown function
duf3709	duf3709	Domain of unknown function
duf3800	duf3800	Domain of unknown function
duf4062	duf4062	Domain of unknown function
duf4065	duf4065	Domain of unknown function
duf411	duf411	Domain of unknown function
duf4145	duf4145	Domain of unknown function
duf4234	duf4234	Domain of unknown function
duf4238	duf4238	Domain of unknown function
duf4262	duf4262	Domain of unknown function
duf4272	duf4272	Domain of unknown function
duf4279	duf4279	Domain of unknown function
duf4365	duf4365	Domain of unknown function
duf4823	duf4823	Domain of unknown function
duf58	duf58	Domain of unknown function
E GII intron	E GII intron	Group II intron
eal	EAL domain-containing protein	EAL domain-containing protein may act as a cyclic diguanylate phosphodiesterase - In molecular biology, the EAL domain is a conserved protein domain. It is found in diverse bacterial signalling proteins.
fad	FAD-binding oxidoreductase	FAD-binding oxidoreductase catalyzes the oxidation or reduction of a specific substrate using flavin adenine dinucleotide (FAD) as a cofactor - The oxidoreductase FAD-binding domain is an evolutionary conserved protein domain.
Fe-ADH	iron-containing alcohol dehydrogenase family protein	Alcohol dehydrogenases (ADH) are a group of dehydrogenase enzymes that occur in many organisms and facilitate the interconversion between alcohols and aldehydes or ketones with the reduction of nicotinamide adenine dinucleotide (NAD+) to NADH.
gaf	GAF domain-containing protein	The GAF domain is a type of protein domain that is found in a wide range of proteins from all species.
gcuF	gcuF	unknown function
gfa	glutathione-dependent formaldehyde-activating GFA	The GFA enzyme catalyzes the first step in the detoxification of formaldehyde. This domain has a beta-tent fold
ggdef	GGDEF domain-containing protein	In molecular biology, the GGDEF domain is a protein domain which appears to be ubiquitous in bacteria and is often linked to a regulatory domain, such as a phosphorylation receiver or oxygen sensing domain.
glx1	glyoxalase/bleomycin resistance/dioxygenase family protein	Glyoxalase is one of two enzymes of the glyoxalase detoxification system against methylglyoxal and other aldehydes, the metabolites derived from glycolysis.
groEL	GroEL	molecular chaperone GroEL acts as an essential chaperone that assists in protein folding in the cell
gsnor	S-(hydroxymethyl)glutathione dehydrogenase/class III alcohol dehydrogenase	the enzyme GSNOR can regulate the cellular level of SNOs and consequently GSNO content.
gyrI-like	GyrI-like domain-containing protein	GyrI-like proteins are widely distributed in prokaryotes and eukaryotes, and recognized as small-molecule binding proteins.
had	HAD family hydrolase	The haloacid dehydrogenase superfamily (HAD superfamily) is a superfamily of enzymes that include phosphatases, phosphonatases, P-type ATPases, beta-phosphoglucomutases, phosphomannomutases, and dehalogenases, and are involved in a variety of cellular processes ranging from amino acid biosynthesis to detoxification.
hhh	helix-hairpin-helix domain-containing protein	Helix–hairpin–helix (HhH) is a widespread motif involved in non-sequence-specific DNA binding.
hnh	HNH endonuclease	These HNH motifs, as defined by the large (∼7,400-member) HNH Pfam protein sequence family (PF01844), are often found in proteins that possess endonuclease activity, such as site-specific homing endonucleases, colicins, S pyocins and restriction enzymes.
HP	Hipotetic protein	unknown function
hsdR	type I restriction enzyme HsdR N-terminal domain-containing protein	This family consists of a number of N terminal regions found in type I restriction enzyme R (HSDR) proteins.
hth	helix-turn-helix domain-containing protein	the helix-turn-helix (HTH) is a major structural motif capable of binding DNA. The HTH motif occurs in many proteins that regulate gene expression. It should not be confused with the helix–loop–helix motif.
hutU	urocanate hydratase	Urocanase (also known as imidazolonepropionate hydrolase or urocanate hydratase) is the enzyme that catalyzes the second step in the degradation of histidine, the hydration of urocanate into imidazolonepropionate.
hyd	alpha/beta hydrolases	alpha/beta hydrolases; A functionally diverse superfamily containing proteases, lipases, peroxidases, esterases, epoxide hydrolases and dehalogenases.
idh	isocitrate dehydrogenase	isocitrate dehydrogenase catalyzes the oxidative decarboxylation of isocitrate, producing alpha-ketoglutarate and CO2 in an NAD-dependent manner or NADP-dependent manner
int	integrase	The integrases are a diverse family of tyrosine recombinases which rearrange DNA duplexes by means of conservative site-specific recombination reactions.
IS110	IS110	IS110 family
IS110-like	IS110-like	IS110 family
IS1326	IS1326	IS21 family
IS1595-like	IS1595-like	IS1595 family
IS1634-like	IS1634-like	IS1634 family
IS21	IS21	IS21 family
IS21-like	IS21-like	IS21 family
IS26	IS26	IS26 family
IS3-like	IS3-like	IS3 family
IS4-like	IS4-like	IS4 family
IS91-like	IS91-like	IS91 family
ISCps9	ISCps9	IS3 family
ISCR1	ISCR1	transposase
ISEc28	ISEc28	IS26 family
ISNCY-like	ISNCY-like	ISNCY family
ISPa33	ISPa33	IS1380 family
ISPsy42-like	ISPsy42-like	Tn3 family
ISSbe3	ISSbe3	IS66 family
ISSde10	ISSde10	IS3 family
ISSde12	ISSde12	IS91 family
ISSde13	ISSde13	IS110 family
ISShes5	ISShes5	Insertion sequence belong to the IS256 family
ISShfr7	ISShfr7	IS110 family
ISShvi3	ISShvi3	IS91 family
ISShwo4	ISShwo4	ISL3 family
ISSod1	ISSod1	IS3 family
ISSod10	ISSod10	IS630 family
ISSod11	ISSod11	Insertion sequence belong to the IS1595 family
ISSod16	ISSod16	IS630 family
ISSod25	ISSod25	IS91 family
ISSpi2	ISSpi2	IS110 family
ISSpi3	ISSpi3	IS110 family
ISSpi5	ISSpi5	IS110 family
ISSpu3-like	ISSpu3-like	ISAs1 family
ISVa2	ISVa2	IS5 family
kap	P-loop NTPase fold protein	The KAP (after Kidins220/ARMS and PifA) family of predicted NTPases are sporadically distributed across a wide phylogenetic range in bacteria and in animals. Many of the prokaryotic KAP NTPases are encoded in plasmids and tend to undergo disruption to form pseudogenes.
kch	ion transport 2 domain-containing protein	potassium channel activity
lacI	LacI family DNA-binding transcriptional regulator	LacI family DNA-binding transcriptional regulator functions as an activator or repressor by binding a specific effector ligand that either decreases (induction) or increases DNA-binding affinity (co-repression)
lip1	Lipase 1 precursor	The enzyme is found in diverse organisms including animals, plants, fungi, and bacteria. It hydrolyzes triglycerides into diglycerides and subsequently into monoglycerides and free fatty acids.
lodA	LodA/GoxA family CTQ-dependent oxidase	GoxA is a cysteine tryptophylquinone (CTQ)-dependent glycine oxidase that is a member of a family of LodA-like proteins. - Recently, a group of quinoproteins called LodA-like proteins was identified that utilize a CTQ cofactor for oxidase activity.
lysE	LysE family transporter	The LysE superfamily consists of transmembrane transport proteins that catalyze export of amino acids, lipids and heavy metal ions.
lysR	LysR family transcriptional regulator	LysR family transcriptional regulator (LTTR) negatively or positively regulates the transcription of specific genes; LTTRs play critical roles in metabolism and constitute the largest family of bacterial regulators
m14	M14 family metallocarboxypeptidase	Peptidase family M14 contains metallocarboxypeptidases. Most of the peptidases in the family are carboxypeptidases, hydrolysing single, C-terminal amino acids from polypeptide chains.
m28	peptidase M28	M28 family metallopeptidase contains aminopeptidases as well as carboxypeptidases that have co-catalytic zinc ions; contains a protease-associated (PA) domain insert which may participate in substrate binding and/or promote conformational changes
mce	mammalian cell entry protein	The mammalian cell entry (Mce) proteins, encoded by mce genes, are a family of invasion proteins expressed by Mycobacteria
merF	mercury resistance system transport protein MerF	mercury resistance system transport protein MerF
merP	mercury resistance system periplasmic binding protein MerP	mercury resistance system periplasmic binding protein MerP
merR	Hg(II)-responsive transcriptional regulator	mercuric resistance operon transcriptional regulator MerR
merT	mercuric ion transporter MerT	mercuric ion transporter MerT
metA	homoserine O-succinyltransferase	Homoserine O-succinyltransferase (MetA) catalyzes the first unique step in the de novo methionine biosynthesis pathway in Escherichia coli. Transfers a succinyl group from succinyl-CoA to L-homoserine, forming succinyl-L-homoserine
mfs	MFS transporter	The major facilitator superfamily (MFS) is a superfamily of membrane transport proteins that facilitate movement of small solutes across cell membranes in response to chemiosmotic gradients.
mp	membrane protein	membrane protein
mreB	Rod shape-determining protein MreB	MreB is a dynamic cytoskeletal protein that controls bacterial width by the spatiotemporal regulation of peptidoglycan synthesis on side walls.
mtase	class I SAM-dependent methyltransferase	class I SAM-dependent methyltransferase catalyzes the methylation of one or more specific substrates using S-adenosyl-L-methionine (SAM or AdoMet) as the methyl donor
nadh	NADH dehydrogenase with NAD(P)-binding domain	NADH dehydrogenase is an enzyme that converts nicotinamide adenine dinucleotide (NAD) from its reduced form (NADH) to its oxidized form (NAD+).
nadp	NAD(P)/FAD-dependent oxidoreductase NAD(P)/FAD	NAD(P)/FAD-dependent oxidoreductase similar to digeranylgeranylglycerophospholipid reductase, menaquinone reductase, tryptophan 2-halogenase, and protein FixC.
narL	two-component system response regulator NarL	The Escherichia coli response regulator NarL controls transcription of genes involved in nitrate respiration during anaerobiosis. NarL consists of two domains joined by a linker that wraps around the interdomain interface.
nat	GNAT family N-acetyltransferase	GNATs are therefore involved in a number of important processes such as small-molecule biosynthesis, antibiotic resistance and gene regulation.
nb	nucleotide-binding protein	Nucleotide-binding proteins are proteins that bind to nucleotides. For example, kinases bind adenosine triphosphate (ATP) and G proteins bind guanosine triphosphate (GTP).
nerd	NERD nuclease	The nuclease-related domain (NERD) is found in a broad range of bacterial, as well as single archaeal and plant proteins.
nlpC	NlpC/P60	Cell wall-associated hydrolase, NlpC family [Cell wall/membrane/envelope biogenesis] - The function of this domain is unknown. It is found in several lipoproteins. - The N1pC/P60 proteins define a family of cell-wall peptidases that are widely represented in various bacterial lineages.
nmo	NMO	Nitronate monooxygenase (NMO), formerly referred to as 2-nitropropane dioxygenase (NPD), is an FMN-dependent enzyme that uses molecular oxygen to oxidize (anionic) alkyl nitronates and, in the case of the enzyme from Neurospora crassa, (neutral) nitroalkanes to the corresponding carbonyl compounds and nitrite.
nudix	NUDIX domain-containing protein	Nudix hydrolases are typically small proteins, larger ones having additional domains with interactive or other catalytic functions
nutf2	nuclear transport factor 2 family protein	Nuclear transport factor 2 (NTF2) is a homodimer which stimulates efficient nuclear import of a cargo protein.
oep	efflux transporter outer membrane subunit	Outer membrane efflux proteins
orf5	orf5	unknown function
orfF	orfF	unknown function
orfP	orfP	unknown function
orfQ	orfQ	unknown function
parA	ParA family protein	This protein is essential for plasmid partition. It ensures the proper distribution of newly replicated plasmids to daughter cells during cell division. ParA is trans-acting.
pgm	phosphoglycerate mutase	Phosphoglycerate mutase (PGM) is any enzyme that catalyzes step 8 of glycolysis. They catalyze the internal transfer of a phosphate group from C-3 to C-2 which results in the conversion of 3-phosphoglycerate (3PG) to 2-phosphoglycerate (2PG) through a 2,3-bisphosphoglycerate intermediate.
pho	conserved hypothetical Ap4A phosphorylase II	phosphorylase. In biochemistry, phosphorylases are enzymes that catalyze the addition of a phosphate group from an inorganic phosphate (phosphate+hydrogen) to an acceptor.
phoA	alkaline phosphatase	alkaline phosphatase is a zinc and magnesium dependent non-specific phosphomonoesterase that catalyzes the hydrolysis of phosphate monoesters at basic pH values.
pirin	pirin family protein	pirin family protein such as quercetin 2,3-dioxygenase, a copper-containing enzyme that catalyzes the insertion of molecular oxygen into polyphenolic flavonols
pnpox	Pyridoxamine 5'-phosphate oxidase	Family of domains with putative PNPOx function. Family members were predicted to encode pyridoxamine 5'-phosphate oxidase, based on sequence similarity.
pop	prolyl oligopeptidase family serine peptidase	A group of serine peptidases, the prolyl oligopeptidase family, cannot hydrolyze peptides containing more than about 30 residues.
pqiA	paraquat-inducible protein A	Paraquat is a superoxide radical-generating agent. The promoter for the pqiA gene is also inducible by other known superoxide generators.
prnA	tryptophan 7-halogenase	Tryptophan 7-halogenase is a member of a class of enzymes known as flavin-dependent halogenases. Numerous medicinally relevant compounds depend upon tryptophan 7-halogenase in their biosynthesis.
ptp	phosphotyrosine protein phosphatase	Protein tyrosine phosphatases are a group of enzymes that remove phosphate groups from phosphorylated tyrosine residues on proteins.
ɸ int	Phage integrase	Phage integrases are enzymes that mediate unidirectional site-specific recombination between two DNA recognition sequences, the phage attachment site, attP, and the bacterial attachment site, attB.
qacE	Quaternary ammonium compound-resistance protein qacE	resistant to quaternary ammonium compound
qacEΔ1	Quaternary ammonium compound-resistance protein qacE	resistant to quaternary ammonium compound
qacH	Quaternary ammonium compound-resistance protein qacH	qacH is a subunit of the qac multidrug efflux pump in Staphylococcus saprophyticus
qnrA	qnrA	quinolone resistance
re	restriction endonuclease	Restriction endonucleases (REs) are bacterial enzymes that cleave double-stranded DNA. Type I REs are important in bacterial function but do not cleave DNA at specific sequences.
rid	reactive intermediate/imine deaminase	This protein was described initially as an inhibitor of protein synthesis intiation, then as an endoribonuclease active on single-stranded mRNA, endoribonuclease L-PSP.
rimJ	RimJ/RimL family protein N-acetyltransferase	N-terminal acetyltransferase of ribosomal protein S5
rnase	Barstar, RNAse (barnase) inhibitor	Barstar is an intracellular inhibitor of barnase, an extracellular ribonuclease of Bacillus amyloliquefaciens.
S41	S41 family peptidase	S41 family peptidase such as tricorn protease (TRI) that contains a PDZ domain; active site consists of a tetrad (serine, histidine, serine, glutamate).
S41*	peptidase S41	Serine-type peptidase activity - Peptidase family S41 contains serine endopeptidases - The bacterial C-terminal processing peptidase-1 (S41.001) is believed to be important for the degradation of incorrectly synthesized proteins.
S9	S9 family peptidase	peptidase S9 family protein, an oligopeptidase which may cleave the prolyl bond of short peptides, similar to oligopeptidase B, which cleaves on the C-terminal side of lysyl and argininyl residues.
sdr	short-chain dehydrogenase	SDR is a very large family of enzymes, most of which are known to be NAD- or NADP-dependent oxidoreductases.
secC	SEC-C	SEC-C domain-containing protein - The SEC-C motif found in the C terminus of the SecA protein, in the middle of some SWI2 ATPases and also solo in several proteins. The motif is predicted to chelate zinc with the CXC and C[HC] pairs that constitute the most conserved feature of the motif.
sel1	sel1 repeat family protein	These solenoid repeat proteins are involved in a diverse spectrum of cellular functions such as cell cycle control, transcription, splicing, protein import, regulatory phosphate turnover and protein folding, by virtue of their tendency to bind target proteins.
sh	serine hidrolase	Serine hydrolases are members of the highly conserved α/β-hydrolase enzyme superfamily and are involved in a variety of key biological processes in both eukaryotes (neural signaling, signal transduction, and metabolism) and prokaryotes (quorum sensing and virulence).
sir2	SIR2 family protein	Silent information regulator 2 (Sir2) proteins, or sirtuins, are protein deacetylases dependent on nicotine adenine dinucleotide (NAD) and are found in organisms ranging from bacteria to humans.
spkB	Serine/threonine-protein kinase B	Protein kinase required for cell motility, but not for phototaxis.
sul1	sulfonamide resistant sul	Sul1 is a sulfonamide resistant dihydropteroate synthase of Gram-negative bacteria.
sulP	SulP family inorganic anion transporter	sulfate transmembrane transporter activity
terC	TerC/Alx family metal homeostasis membrane protein	A family containing a number of integral membrane proteins is named after TerC protein. TerC has been implicated in resistance to tellurium, and may be involved in efflux of tellurium ions.
TetR/acrR	TetR/AcrR family transcriptional regulator	TetR-family transcriptional regulators (TFTRs) are DNA binding factors that regulate gene expression in bacteria.
tir2	TIR domain-containing protein	This is a family of bacterial Toll-like receptors. - The Toll/interleukin-1 receptor/resistance protein (TIR) domain is a protein-protein interaction domain consisting of 125-200 residues, widely distributed in animals, plants and bacteria but absent from fungi, archea and viruses.
tm2	TM2 domain-containing protein	TM2 domain; This family is composed of a pair of transmembrane alpha helices connected by a short linker. The function of this domain is unknown, however it occurs in a wide range or protein contexts.
tniA	tniA	transposase
tniBΔ1	tniB	TniB is a probable ATP-binding protein which is involved in Tn5053 mercury resistance transposition
tniC	tniC (transposase)	transposase
tniQ	tniQ (transposase)	transposase
tnpR	tnpR	transposase
tonB	energy transducer TonB	energy transducer TonB interacts with outer membrane receptor proteins that carry out high-affinity binding and energy dependent uptake into the periplasmic space of specific substrates such as cobalamin, and various iron compounds (such as iron dicitrate, enterochelin, aerobactin, etc.)
tRNAser	tRNAser	tRNAser is the tRNA molecule that binds L-serine. A transfer RNA (tRNA) is an adaptor molecule made out of RNA that serves as the physical link between the nucleotide sequence of nucleic acids (DNA and RNA) and the amino acid sequence of proteins.
trpA	tryptophan synthase subunit alpha	The alpha subunit is responsible for the aldol cleavage of indoleglycerol phosphate to indole and glyceraldehyde 3-phosphate. Required for tryptophan biosynthesis. Contributes to the tryptophan-independent indole biosynthesis, and possibly to auxin production.
UPF0167	UPF0167	Uncharacterized protein family (UPF0167); The proteins in this family are about 200 amino acids long and each contain 3 CXXC motifs.
voc	VOC	vicinal oxygen chelate (VOC) family protein uses a metal center to coordinate a substrate, intermediate, or transition state through vicinal oxygen atoms; similar to type I extradiol dioxygenase, glyoxalase I and a group of antibiotic resistance proteins such as Staphylococcus aureus bleomycin resistance protein
Y-Family DNA pol	Y-family DNA polymerase	Y-family DNA polymerase facilitates translesion synthesis (TLS), a process that allows the bypass of a variety of DNA lesions, and is similar to translesion error-prone DNA polymerase V subunit UmuC
yciB	septation protein A	Inner membrane-spanning protein YciB (also known as intracellular septation protein A) is a family of proteins which are essential for both normal cell division and bacterial virulence and are believed to play a role in the septation process.
ycxB-like	YcxB family protein	The YcxB-like protein family includes the B. subtilis YcxB protein, which is a functionally uncharacterized transmembrane protein. This family of proteins is found in bacteria, and is approximately 60 amino acids in length.
yebG	YebG family protein	This family consists of several bacterial YebG proteins of around 75 residues in length. The exact function of this protein is unknown but it is thought to be involved in the SOS response.
yejK	nucleoid-associated protein YejK	nucleoid-associated protein NdpA/YejK involved in chromosomal DNA condensation and regulation of gene expression
yfbU	YfbU family protein	cellular response to DNA damage stimulus
ypeA	GNAT family N-acetyltransferase	N-acetyltransferase activity
