# Supplementary figures and images for: Novel Mobile Integrons and Strain-Specific Integrase Genes within <em>Shewanella</em> spp. Unveil Multiple Lateral Genetic Transfer Events within the Genus
Source: Preprints.org preprint supplement (doi:10.20944/preprints202204.0173.v1), 2022-04-19

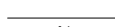

Supplement: Supplementary file 2 [file supplementary]
